# Supplementary material
Source: publisher figshare collection journal article supplement (https://gsajournals.figshare.com/articles/dataset/_/12542930)
Supplement: Supplementary file 1 [file 1]

## Sheet: 10_7e_1MapANDnotMappedwithGeneI
Table S5. SNP markers’ genetic map positions. In the "Marker assignment to the genetic map" column, “correctChromosome” indicates a marker mapped to the expected pseudochromosome given its linkage group; “newlyAssign” indicates a marker mapped to an unknown pseudochromosome and is mapped to a linkage group; “noBecauseOf15perHetCalls” indicates an unmapped marker because more than 15% of all reads…
Marker	Chr	Marker position on physical map	Gene ID and intergenic region	Distortion direction	Marker assignment to the genetic map	Marker on genetic map	Linkage group	Marker position (CM) on genetic map
chr1A_10072118	chr1A	10072118	TraesCS1A01G020600	NA	correctChromosome	chr1A_10069789	1A	0
chr1A_10070434	chr1A	10070434	TraesCS1A01G020600	NA	correctChromosome	chr1A_10069789	1A	0
chr1A_10070075	chr1A	10070075	TraesCS1A01G020600	NA	correctChromosome	chr1A_10069789	1A	0
chr1A_10069789	chr1A	10069789	TraesCS1A01G020500	NA	correctChromosome	chr1A_10069789	1A	0
chr1A_10132973	chr1A	10132973	TraesCS1A01G020900	NA	correctChromosome	chr1A_10069789	1A	0
chr1A_10132661	chr1A	10132661	TraesCS1A01G020900	NA	correctChromosome	chr1A_10069789	1A	0
chr1A_10069891	chr1A	10069891	TraesCS1A01G020600	NA	correctChromosome	chr1A_10069789	1A	0
chr1A_10069658	chr1A	10069658	TraesCS1A01G020500	NA	correctChromosome	chr1A_10069789	1A	0
chr1A_10071112	chr1A	10071112	TraesCS1A01G020600	NA	correctChromosome	chr1A_10069789	1A	0
chr1A_10132664	chr1A	10132664	TraesCS1A01G020900	NA	correctChromosome	chr1A_10132856	1A	0.65377
chr1A_10132856	chr1A	10132856	TraesCS1A01G020900	NA	correctChromosome	chr1A_10132856	1A	0.65377
chr1A_10132967	chr1A	10132967	TraesCS1A01G020900	NA	correctChromosome	chr1A_10132856	1A	0.65377
chr1A_10132642	chr1A	10132642	TraesCS1A01G020900	NA	correctChromosome	chr1A_10132856	1A	0.65377
chr1A_12103106	chr1A	12103106	TraesCS1A01G024700	NA	correctChromosome	chr1A_12093436	1A	0.99333
chr1A_12093436	chr1A	12093436	TraesCS1A01G024600	NA	correctChromosome	chr1A_12093436	1A	0.99333
chr1A_12098742	chr1A	12098742	TraesCS1A01G024600	NA	correctChromosome	chr1A_12093436	1A	0.99333
chr1A_12160451	chr1A	12160451	TraesCS1A01G025200	NA	correctChromosome	chr1A_12093436	1A	0.99333
chr1A_12103279	chr1A	12103279	TraesCS1A01G024700	NA	correctChromosome	chr1A_12093436	1A	0.99333
chr1A_12102346	chr1A	12102346	TraesCS1A01G024700	NA	correctChromosome	chr1A_12093436	1A	0.99333
chr1A_12102950	chr1A	12102950	TraesCS1A01G024700	NA	correctChromosome	chr1A_12093436	1A	0.99333
chr1A_12093366	chr1A	12093366	TraesCS1A01G024500	NA	correctChromosome	chr1A_12093436	1A	0.99333
chr1A_12098032	chr1A	12098032	TraesCS1A01G024600	NA	correctChromosome	chr1A_12093436	1A	0.99333
chr1A_12103257	chr1A	12103257	TraesCS1A01G024700	NA	correctChromosome	chr1A_12093436	1A	0.99333
chr1A_12096440	chr1A	12096440	TraesCS1A01G024600	NA	correctChromosome	chr1A_12093436	1A	0.99333
chr1A_12368815	chr1A	12368815	TraesCS1A01G025900	NA	correctChromosome	chr1A_12368815	1A	2.92748
chr1A_12502870	chr1A	12502870	TraesCS1A01G026200	NA	correctChromosome	chr1A_12506554	1A	4.77258
chr1A_12590590	chr1A	12590590	TraesCS1A01G026400	NA	correctChromosome	chr1A_12506554	1A	4.77258
chr1A_12506132	chr1A	12506132	TraesCS1A01G026200	NA	correctChromosome	chr1A_12506554	1A	4.77258
chr1A_12592135	chr1A	12592135	TraesCS1A01G026400	NA	correctChromosome	chr1A_12506554	1A	4.77258
chr1A_12585370	chr1A	12585370	TraesCS1A01G026400	NA	correctChromosome	chr1A_12506554	1A	4.77258
chr1A_12506554	chr1A	12506554	TraesCS1A01G026200	NA	correctChromosome	chr1A_12506554	1A	4.77258
chr1A_12506713	chr1A	12506713	TraesCS1A01G026200	NA	correctChromosome	chr1A_12506554	1A	4.77258
chr1A_12586732	chr1A	12586732	TraesCS1A01G026400	NA	correctChromosome	chr1A_12506554	1A	4.77258
chr1A_13761394	chr1A	13761394	TraesCS1A01G029300	NA	correctChromosome	chr1A_13761394	1A	5.30456
chr1A_14046273	chr1A	14046273	TraesCS1A01G030100	NA	correctChromosome	chr1A_14046273	1A	11.3394
chr1A_14163119	chr1A	14163119	TraesCS1A01G030700	NA	correctChromosome	chr1A_14163119	1A	7.32535
chr1A_14162726	chr1A	14162726	TraesCS1A01G030700	NA	correctChromosome	chr1A_14163119	1A	7.32535
chr1A_15438327	chr1A	15438327	TraesCS1A01G033000	NA	correctChromosome	chr1A_15438394	1A	11.8064
chr1A_15438394	chr1A	15438394	TraesCS1A01G033000	NA	correctChromosome	chr1A_15438394	1A	11.8064
chr1A_243162252	chr1A	243162252	TraesCS1A01G142400	NA	correctChromosome	chr1A_189711028	1A	28.8166
chr1A_242012504	chr1A	242012504	TraesCS1A01G142200	NA	correctChromosome	chr1A_189711028	1A	28.8166
chr1A_189711028	chr1A	189711028	TraesCS1A01G133700	NA	correctChromosome	chr1A_189711028	1A	28.8166
chr1A_181753837	chr1A	181753837	TraesCS1A01G132600	NA	correctChromosome	chr1A_189711028	1A	28.8166
chr1A_113860349	chr1A	113860349	TraesCS1A01G112100	NA	correctChromosome	chr1A_189711028	1A	28.8166
chr1A_208882495	chr1A	208882495	TraesCS1A01G135600	NA	correctChromosome	chr1A_208882495	1A	29.6402
chr1A_20898169	chr1A	20898169	TraesCS1A01G037400	NA	correctChromosome	chr1A_20975751	1A	13.0987
chr1A_21624934	chr1A	21624934	TraesCS1A01G039400	NA	correctChromosome	chr1A_20975751	1A	13.0987
chr1A_20978063	chr1A	20978063	TraesCS1A01G037900	NA	correctChromosome	chr1A_20975751	1A	13.0987
chr1A_20978933	chr1A	20978933	TraesCS1A01G037900	NA	correctChromosome	chr1A_20975751	1A	13.0987
chr1A_20894769	chr1A	20894769	TraesCS1A01G037400	NA	correctChromosome	chr1A_20975751	1A	13.0987
chr1A_20978783	chr1A	20978783	TraesCS1A01G037900	NA	correctChromosome	chr1A_20975751	1A	13.0987
chr1A_20897386	chr1A	20897386	TraesCS1A01G037400	NA	correctChromosome	chr1A_20975751	1A	13.0987
chr1A_20978738	chr1A	20978738	TraesCS1A01G037900	NA	correctChromosome	chr1A_20975751	1A	13.0987
chr1A_20977987	chr1A	20977987	TraesCS1A01G037900	NA	correctChromosome	chr1A_20975751	1A	13.0987
chr1A_20895378	chr1A	20895378	TraesCS1A01G037400	NA	correctChromosome	chr1A_20975751	1A	13.0987
chr1A_21626727	chr1A	21626727	TraesCS1A01G039400	NA	correctChromosome	chr1A_20975751	1A	13.0987
chr1A_20978739	chr1A	20978739	TraesCS1A01G037900	NA	correctChromosome	chr1A_20975751	1A	13.0987
chr1A_20980112	chr1A	20980112	TraesCS1A01G037900	NA	correctChromosome	chr1A_20975751	1A	13.0987
chr1A_20894313	chr1A	20894313	TraesCS1A01G037400	NA	correctChromosome	chr1A_20975751	1A	13.0987
chr1A_20978004	chr1A	20978004	TraesCS1A01G037900	NA	correctChromosome	chr1A_20975751	1A	13.0987
chr1A_20895392	chr1A	20895392	TraesCS1A01G037400	NA	correctChromosome	chr1A_20975751	1A	13.0987
chr1A_20893971	chr1A	20893971	TraesCS1A01G037400	NA	correctChromosome	chr1A_20975751	1A	13.0987
chr1A_20975751	chr1A	20975751	TraesCS1A01G037900	NA	correctChromosome	chr1A_20975751	1A	13.0987
chr1A_20978782	chr1A	20978782	TraesCS1A01G037900	NA	correctChromosome	chr1A_20975751	1A	13.0987
chr1A_22294979	chr1A	22294979	TraesCS1A01G040400	NA	correctChromosome	chr1A_20975751	1A	13.0987
chr1A_21619958	chr1A	21619958	TraesCS1A01G039400	NA	correctChromosome	chr1A_21619958	1A	13.5212
chr1A_23339505	chr1A	23339505	TraesCS1A01G042700	NA	correctChromosome	chr1A_23339505	1A	13.9407
chr1A_23339529	chr1A	23339529	TraesCS1A01G042700	NA	correctChromosome	chr1A_23339505	1A	13.9407
chr1A_23967143	chr1A	23967143	TraesCS1A01G043200	NA	correctChromosome	chr1A_23967143	1A	15.2316
chr1A_28626991	chr1A	28626991	TraesCS1A01G046700	NA	correctChromosome	chr1A_28360847	1A	17.1686
chr1A_28611790	chr1A	28611790	TraesCS1A01G046500	NA	correctChromosome	chr1A_28360847	1A	17.1686
chr1A_28361810	chr1A	28361810	TraesCS1A01G046400	NA	correctChromosome	chr1A_28360847	1A	17.1686
chr1A_28360847	chr1A	28360847	TraesCS1A01G046400	NA	correctChromosome	chr1A_28360847	1A	17.1686
chr1A_28363063	chr1A	28363063	TraesCS1A01G046400	NA	correctChromosome	chr1A_28360847	1A	17.1686
chr1A_28622835	chr1A	28622835	TraesCS1A01G046600	NA	correctChromosome	chr1A_28360847	1A	17.1686
chr1A_28364675	chr1A	28364675	TraesCS1A01G046400	NA	correctChromosome	chr1A_28360847	1A	17.1686
chr1A_28614097	chr1A	28614097	TraesCS1A01G046500	NA	correctChromosome	chr1A_28360847	1A	17.1686
chr1A_28614301	chr1A	28614301	TraesCS1A01G046500	NA	correctChromosome	chr1A_28360847	1A	17.1686
chr1A_28626883	chr1A	28626883	TraesCS1A01G046700	NA	correctChromosome	chr1A_28360847	1A	17.1686
chr1A_28613922	chr1A	28613922	TraesCS1A01G046500	NA	correctChromosome	chr1A_28360847	1A	17.1686
chr1A_28622947	chr1A	28622947	TraesCS1A01G046600	NA	correctChromosome	chr1A_28360847	1A	17.1686
chr1A_28362042	chr1A	28362042	TraesCS1A01G046400	NA	correctChromosome	chr1A_28360847	1A	17.1686
chr1A_28362880	chr1A	28362880	TraesCS1A01G046400	NA	correctChromosome	chr1A_28360847	1A	17.1686
chr1A_28709793	chr1A	28709793	TraesCS1A01G046800	NA	correctChromosome	chr1A_28360847	1A	17.1686
chr1A_28626828	chr1A	28626828	TraesCS1A01G046600	NA	correctChromosome	chr1A_28360847	1A	17.1686
chr1A_28619587	chr1A	28619587	TraesCS1A01G046500	NA	correctChromosome	chr1A_28619587	1A	15.877
chr1A_31779285	chr1A	31779285	TraesCS1A01G049700	NA	correctChromosome	chr1A_31779285	1A	19.1059
chr1A_28760221	chr1A	28760221	TraesCS1A01G047000	NA	correctChromosome	chr1A_31781725	1A	18.4602
chr1A_31781725	chr1A	31781725	TraesCS1A01G049700	NA	correctChromosome	chr1A_31781725	1A	18.4602
chr1A_32087536	chr1A	32087536	TraesCS1A01G050100	NA	correctChromosome	chr1A_31781725	1A	18.4602
chr1A_32088842	chr1A	32088842	TraesCS1A01G050100	NA	correctChromosome	chr1A_31781725	1A	18.4602
chr1A_31777751	chr1A	31777751	TraesCS1A01G049700	NA	correctChromosome	chr1A_31781725	1A	18.4602
chr1A_31779240	chr1A	31779240	TraesCS1A01G049700	NA	correctChromosome	chr1A_31781725	1A	18.4602
chr1A_28762587	chr1A	28762587	TraesCS1A01G047000	NA	correctChromosome	chr1A_31781725	1A	18.4602
chr1A_31781750	chr1A	31781750	TraesCS1A01G049700	NA	correctChromosome	chr1A_31781725	1A	18.4602
chr1A_36566200	chr1A	36566200	TraesCS1A01G055400	NA	correctChromosome	chr1A_31781725	1A	18.4602
chr1A_31781591	chr1A	31781591	TraesCS1A01G049700	NA	correctChromosome	chr1A_31781725	1A	18.4602
chr1A_33373164	chr1A	33373164	TraesCS1A01G051700	NA	correctChromosome	chr1A_33364945	1A	19.7979
chr1A_33372474	chr1A	33372474	TraesCS1A01G051800	NA	correctChromosome	chr1A_33364945	1A	19.7979
chr1A_33375691	chr1A	33375691	TraesCS1A01G051900	NA	correctChromosome	chr1A_33364945	1A	19.7979
chr1A_33364945	chr1A	33364945	TraesCS1A01G051600-TraesCS1A01G051700	NA	correctChromosome	chr1A_33364945	1A	19.7979
chr1A_36565739	chr1A	36565739	TraesCS1A01G055400	NA	correctChromosome	chr1A_33364945	1A	19.7979
chr1A_34162954	chr1A	34162954	TraesCS1A01G052200	NA	correctChromosome	chr1A_33364945	1A	19.7979
chr1A_34173061	chr1A	34173061	TraesCS1A01G052200	NA	correctChromosome	chr1A_33364945	1A	19.7979
chr1A_34173064	chr1A	34173064	TraesCS1A01G052200	NA	correctChromosome	chr1A_33364945	1A	19.7979
chr1A_33375488	chr1A	33375488	TraesCS1A01G051800	NA	correctChromosome	chr1A_33364945	1A	19.7979
chr1A_34921413	chr1A	34921413	TraesCS1A01G053000-TraesCS1A01G053100	NA	correctChromosome	chr1A_34921413	1A	20.4901
chr1A_352014902	chr1A	352014902	TraesCS1A01G195000	NA	correctChromosome	chr1A_352015564	1A	33.0248
chr1A_352014172	chr1A	352014172	TraesCS1A01G195000	NA	correctChromosome	chr1A_352015564	1A	33.0248
chr1A_355722334	chr1A	355722334	TraesCS1A01G198000	NA	correctChromosome	chr1A_352015564	1A	33.0248
chr1A_351607887	chr1A	351607887	TraesCS1A01G194400	NA	correctChromosome	chr1A_352015564	1A	33.0248
chr1A_356390189	chr1A	356390189	TraesCS1A01G198200	NA	correctChromosome	chr1A_352015564	1A	33.0248
chr1A_330770782	chr1A	330770782	TraesCS1A01G182700	NA	correctChromosome	chr1A_352015564	1A	33.0248
chr1A_352014666	chr1A	352014666	TraesCS1A01G195000	NA	correctChromosome	chr1A_352015564	1A	33.0248
chr1A_324498052	chr1A	324498052	TraesCS1A01G179500	NA	correctChromosome	chr1A_352015564	1A	33.0248
chr6B_159423696	chr6B	159423696	TraesCS6B01G157200-TraesCS6B01G157300	NA	wrongChromosome	chr1A_352015564	1A	33.0248
chr1A_344486158	chr1A	344486158	TraesCS1A01G190700	NA	correctChromosome	chr1A_352015564	1A	33.0248
chr1A_352014319	chr1A	352014319	TraesCS1A01G195000	NA	correctChromosome	chr1A_352015564	1A	33.0248
chr1A_352015427	chr1A	352015427	TraesCS1A01G195000	NA	correctChromosome	chr1A_352015564	1A	33.0248
chr1A_351607599	chr1A	351607599	TraesCS1A01G194400	NA	correctChromosome	chr1A_352015564	1A	33.0248
chr1A_368825479	chr1A	368825479	TraesCS1A01G206700	NA	correctChromosome	chr1A_352015564	1A	33.0248
chr1A_344482920	chr1A	344482920	TraesCS1A01G190700	NA	correctChromosome	chr1A_352015564	1A	33.0248
chr1A_352013338	chr1A	352013338	TraesCS1A01G195000	NA	correctChromosome	chr1A_352015564	1A	33.0248
chr1A_352016376	chr1A	352016376	TraesCS1A01G195000	NA	correctChromosome	chr1A_352015564	1A	33.0248
chr1A_352137657	chr1A	352137657	TraesCS1A01G195100	NA	correctChromosome	chr1A_352015564	1A	33.0248
chr1A_350408825	chr1A	350408825	TraesCS1A01G193400-TraesCS1A01G193500	NA	correctChromosome	chr1A_352015564	1A	33.0248
chr1A_344294441	chr1A	344294441	TraesCS1A01G190500	NA	correctChromosome	chr1A_352015564	1A	33.0248
chr1A_351347747	chr1A	351347747	TraesCS1A01G193900	NA	correctChromosome	chr1A_352015564	1A	33.0248
chr1A_345114315	chr1A	345114315	TraesCS1A01G190800	NA	correctChromosome	chr1A_352015564	1A	33.0248
chr1A_392526504	chr1A	392526504	TraesCS1A01G222700	NA	correctChromosome	chr1A_352015564	1A	33.0248
chr1A_333622621	chr1A	333622621	TraesCS1A01G183800	NA	correctChromosome	chr1A_352015564	1A	33.0248
chr1A_345789970	chr1A	345789970	TraesCS1A01G191400	NA	correctChromosome	chr1A_352015564	1A	33.0248
chr1A_351879794	chr1A	351879794	TraesCS1A01G194800	NA	correctChromosome	chr1A_352015564	1A	33.0248
chr1A_350410258	chr1A	350410258	TraesCS1A01G193400-TraesCS1A01G193500	NA	correctChromosome	chr1A_352015564	1A	33.0248
chr1A_345308692	chr1A	345308692	TraesCS1A01G191200	NA	correctChromosome	chr1A_352015564	1A	33.0248
chr1A_352015649	chr1A	352015649	TraesCS1A01G195000	NA	correctChromosome	chr1A_352015564	1A	33.0248
chr1A_353256926	chr1A	353256926	TraesCS1A01G195400	NA	correctChromosome	chr1A_352015564	1A	33.0248
chr1A_362629133	chr1A	362629133	TraesCS1A01G201500-TraesCS1A01G201600	NA	correctChromosome	chr1A_352015564	1A	33.0248
chr1A_355627775	chr1A	355627775	TraesCS1A01G197600	NA	correctChromosome	chr1A_352015564	1A	33.0248
chr1A_354938473	chr1A	354938473	TraesCS1A01G196600	NA	correctChromosome	chr1A_352015564	1A	33.0248
chr1A_352015605	chr1A	352015605	TraesCS1A01G195000	NA	correctChromosome	chr1A_352015564	1A	33.0248
chr1A_352015436	chr1A	352015436	TraesCS1A01G195000	NA	correctChromosome	chr1A_352015564	1A	33.0248
chr1A_353254904	chr1A	353254904	TraesCS1A01G195500	NA	correctChromosome	chr1A_352015564	1A	33.0248
chr1A_345108406	chr1A	345108406	TraesCS1A01G190800	NA	correctChromosome	chr1A_352015564	1A	33.0248
chr1A_355722229	chr1A	355722229	TraesCS1A01G198000	NA	correctChromosome	chr1A_352015564	1A	33.0248
chr1A_352013251	chr1A	352013251	TraesCS1A01G195000	NA	correctChromosome	chr1A_352015564	1A	33.0248
chr1A_352013055	chr1A	352013055	TraesCS1A01G195000	NA	correctChromosome	chr1A_352015564	1A	33.0248
chr1A_352013087	chr1A	352013087	TraesCS1A01G195000	NA	correctChromosome	chr1A_352015564	1A	33.0248
chr1A_347922491	chr1A	347922491	TraesCS1A01G192600	NA	correctChromosome	chr1A_352015564	1A	33.0248
chr1A_364228024	chr1A	364228024	TraesCS1A01G203000	NA	correctChromosome	chr1A_352015564	1A	33.0248
chr1A_345783748	chr1A	345783748	TraesCS1A01G191300	NA	correctChromosome	chr1A_352015564	1A	33.0248
chr1A_355721423	chr1A	355721423	TraesCS1A01G198000	NA	correctChromosome	chr1A_352015564	1A	33.0248
chr1A_352179643	chr1A	352179643	TraesCS1A01G195200	NA	correctChromosome	chr1A_352015564	1A	33.0248
chr1A_344482500	chr1A	344482500	TraesCS1A01G190700	NA	correctChromosome	chr1A_352015564	1A	33.0248
chr1A_345310497	chr1A	345310497	TraesCS1A01G191100	NA	correctChromosome	chr1A_352015564	1A	33.0248
chr1A_345309182	chr1A	345309182	TraesCS1A01G191200	NA	correctChromosome	chr1A_352015564	1A	33.0248
chr1A_355722223	chr1A	355722223	TraesCS1A01G198000	NA	correctChromosome	chr1A_352015564	1A	33.0248
chr1A_351344913	chr1A	351344913	TraesCS1A01G193900	NA	correctChromosome	chr1A_352015564	1A	33.0248
chr1A_351883116	chr1A	351883116	TraesCS1A01G194800	NA	correctChromosome	chr1A_352015564	1A	33.0248
chr1A_355718637	chr1A	355718637	TraesCS1A01G197900	NA	correctChromosome	chr1A_352015564	1A	33.0248
chr1A_355718804	chr1A	355718804	TraesCS1A01G197900	NA	correctChromosome	chr1A_352015564	1A	33.0248
chr1A_355321741	chr1A	355321741	TraesCS1A01G197000	NA	correctChromosome	chr1A_352015564	1A	33.0248
chr1A_355624342	chr1A	355624342	TraesCS1A01G197600	NA	correctChromosome	chr1A_352015564	1A	33.0248
chr1A_347321689	chr1A	347321689	TraesCS1A01G191900	NA	correctChromosome	chr1A_352015564	1A	33.0248
chr1A_347923064	chr1A	347923064	TraesCS1A01G192600	NA	correctChromosome	chr1A_352015564	1A	33.0248
chr1A_345786602	chr1A	345786602	TraesCS1A01G191400	NA	correctChromosome	chr1A_352015564	1A	33.0248
chr1A_356392452	chr1A	356392452	TraesCS1A01G198200	NA	correctChromosome	chr1A_352015564	1A	33.0248
chr1A_344481064	chr1A	344481064	TraesCS1A01G190700	NA	correctChromosome	chr1A_352015564	1A	33.0248
chr1A_344482647	chr1A	344482647	TraesCS1A01G190700	NA	correctChromosome	chr1A_352015564	1A	33.0248
chr1A_352016020	chr1A	352016020	TraesCS1A01G195000	NA	correctChromosome	chr1A_352015564	1A	33.0248
chr1A_352015564	chr1A	352015564	TraesCS1A01G195000	NA	correctChromosome	chr1A_352015564	1A	33.0248
chr1A_344480903	chr1A	344480903	TraesCS1A01G190700	NA	correctChromosome	chr1A_352015564	1A	33.0248
chr1A_355721800	chr1A	355721800	TraesCS1A01G198000	NA	correctChromosome	chr1A_352015564	1A	33.0248
chr1A_368821044	chr1A	368821044	TraesCS1A01G206700	NA	correctChromosome	chr1A_352015564	1A	33.0248
chr1A_355335999	chr1A	355335999	TraesCS1A01G197200	NA	correctChromosome	chr1A_352015564	1A	33.0248
chr1A_353626193	chr1A	353626193	TraesCS1A01G195700	NA	correctChromosome	chr1A_352015564	1A	33.0248
chr1A_368813377	chr1A	368813377	TraesCS1A01G206600	NA	correctChromosome	chr1A_352015564	1A	33.0248
chr1A_348400500	chr1A	348400500	TraesCS1A01G192800	NA	correctChromosome	chr1A_352015564	1A	33.0248
chr1A_347322461	chr1A	347322461	TraesCS1A01G191900	NA	correctChromosome	chr1A_352015564	1A	33.0248
chr1A_345309052	chr1A	345309052	TraesCS1A01G191200	NA	correctChromosome	chr1A_352015564	1A	33.0248
chr1A_345309209	chr1A	345309209	TraesCS1A01G191200	NA	correctChromosome	chr1A_352015564	1A	33.0248
chr1A_352139318	chr1A	352139318	TraesCS1A01G195100	NA	correctChromosome	chr1A_352015564	1A	33.0248
chr1A_354934775	chr1A	354934775	TraesCS1A01G196500	NA	correctChromosome	chr1A_352015564	1A	33.0248
chr1A_344483109	chr1A	344483109	TraesCS1A01G190700	NA	correctChromosome	chr1A_352015564	1A	33.0248
chr1A_353252127	chr1A	353252127	TraesCS1A01G195400	NA	correctChromosome	chr1A_352015564	1A	33.0248
chr1A_352854476	chr1A	352854476	TraesCS1A01G195300	NA	correctChromosome	chr1A_352015564	1A	33.0248
chr1A_347621726	chr1A	347621726	TraesCS1A01G192200	NA	correctChromosome	chr1A_352015564	1A	33.0248
chr1A_348721534	chr1A	348721534	TraesCS1A01G193000	NA	correctChromosome	chr1A_352015564	1A	33.0248
chr1A_347324145	chr1A	347324145	TraesCS1A01G191900	NA	correctChromosome	chr1A_352015564	1A	33.0248
chr1A_368829970	chr1A	368829970	TraesCS1A01G206700	NA	correctChromosome	chr1A_352015564	1A	33.0248
chr1A_364226253	chr1A	364226253	TraesCS1A01G203000	NA	correctChromosome	chr1A_352015564	1A	33.0248
chr1A_347621733	chr1A	347621733	TraesCS1A01G192200	NA	correctChromosome	chr1A_352015564	1A	33.0248
chr1A_368809069	chr1A	368809069	TraesCS1A01G206600	NA	correctChromosome	chr1A_352015564	1A	33.0248
chr1A_354934786	chr1A	354934786	TraesCS1A01G196500	NA	correctChromosome	chr1A_352015564	1A	33.0248
chr1A_368819885	chr1A	368819885	TraesCS1A01G206700	NA	correctChromosome	chr1A_352015564	1A	33.0248
chr1A_345309794	chr1A	345309794	TraesCS1A01G191200	NA	correctChromosome	chr1A_352015564	1A	33.0248
chr1A_353626434	chr1A	353626434	TraesCS1A01G195700	NA	correctChromosome	chr1A_352015564	1A	33.0248
chr1A_368816004	chr1A	368816004	TraesCS1A01G206700	NA	correctChromosome	chr1A_352015564	1A	33.0248
chr1A_355718508	chr1A	355718508	TraesCS1A01G197900	NA	correctChromosome	chr1A_355718508	1A	31.273
chr1A_365493113	chr1A	365493113	TraesCS1A01G203600	NA	correctChromosome	chr1A_365493113	1A	32.0309
chr1A_36268490	chr1A	36268490	TraesCS1A01G054900	NA	correctChromosome	chr1A_36566299	1A	22.2229
chr1A_36569717	chr1A	36569717	TraesCS1A01G055400	NA	correctChromosome	chr1A_36566299	1A	22.2229
chr1A_36566299	chr1A	36566299	TraesCS1A01G055400	NA	correctChromosome	chr1A_36566299	1A	22.2229
chr1A_36569647	chr1A	36569647	TraesCS1A01G055400	NA	correctChromosome	chr1A_36566299	1A	22.2229
chr1A_36281021	chr1A	36281021	TraesCS1A01G055200	NA	correctChromosome	chr1A_36566299	1A	22.2229
chr1A_34921512	chr1A	34921512	TraesCS1A01G053000-TraesCS1A01G053100	NA	correctChromosome	chr1A_36566299	1A	22.2229
chr1A_36569738	chr1A	36569738	TraesCS1A01G055400	NA	correctChromosome	chr1A_36566299	1A	22.2229
chr1A_391250292	chr1A	391250292	TraesCS1A01G221800	NA	correctChromosome	chr1A_391253406	1A	39.1469
chr1A_390087954	chr1A	390087954	TraesCS1A01G221100	NA	correctChromosome	chr1A_391253406	1A	39.1469
chr1A_390639822	chr1A	390639822	TraesCS1A01G221400	NA	correctChromosome	chr1A_391253406	1A	39.1469
chr1A_390092493	chr1A	390092493	TraesCS1A01G221100	NA	correctChromosome	chr1A_391253406	1A	39.1469
chr1A_390096077	chr1A	390096077	TraesCS1A01G221100	NA	correctChromosome	chr1A_391253406	1A	39.1469
chr1A_391249448	chr1A	391249448	TraesCS1A01G221800	NA	correctChromosome	chr1A_391253406	1A	39.1469
chr1A_391674559	chr1A	391674559	TraesCS1A01G222000	NA	correctChromosome	chr1A_391253406	1A	39.1469
chr1A_390640187	chr1A	390640187	TraesCS1A01G221400	NA	correctChromosome	chr1A_391253406	1A	39.1469
chr1A_389869490	chr1A	389869490	TraesCS1A01G221000	NA	correctChromosome	chr1A_391253406	1A	39.1469
chr1A_397773004	chr1A	397773004	TraesCS1A01G227100	NA	correctChromosome	chr1A_391253406	1A	39.1469
chr1A_390639316	chr1A	390639316	TraesCS1A01G221400	NA	correctChromosome	chr1A_391253406	1A	39.1469
chr1A_397775877	chr1A	397775877	TraesCS1A01G227200	NA	correctChromosome	chr1A_391253406	1A	39.1469
chr1A_390089743	chr1A	390089743	TraesCS1A01G221100	NA	correctChromosome	chr1A_391253406	1A	39.1469
chr1A_391253406	chr1A	391253406	TraesCS1A01G221800	NA	correctChromosome	chr1A_391253406	1A	39.1469
chr1A_394321005	chr1A	394321005	TraesCS1A01G223900	NA	correctChromosome	chr1A_391253406	1A	39.1469
chr1A_391260213	chr1A	391260213	TraesCS1A01G221900	NA	correctChromosome	chr1A_391253406	1A	39.1469
chr1A_396432289	chr1A	396432289	TraesCS1A01G226300	NA	correctChromosome	chr1A_391253406	1A	39.1469
chr1A_394569555	chr1A	394569555	TraesCS1A01G224500	NA	correctChromosome	chr1A_391253406	1A	39.1469
chr1A_392526603	chr1A	392526603	TraesCS1A01G222700	NA	correctChromosome	chr1A_391253406	1A	39.1469
chr1A_397772371	chr1A	397772371	TraesCS1A01G227100	NA	correctChromosome	chr1A_391253406	1A	39.1469
chr1A_392526141	chr1A	392526141	TraesCS1A01G222700	NA	correctChromosome	chr1A_391253406	1A	39.1469
chr1A_391260192	chr1A	391260192	TraesCS1A01G221900	NA	correctChromosome	chr1A_391253406	1A	39.1469
chr1A_394258879	chr1A	394258879	TraesCS1A01G223700	NA	correctChromosome	chr1A_391253406	1A	39.1469
chr1A_389869619	chr1A	389869619	TraesCS1A01G221000	NA	correctChromosome	chr1A_391253406	1A	39.1469
chr1A_389869363	chr1A	389869363	TraesCS1A01G221000	NA	correctChromosome	chr1A_391253406	1A	39.1469
chr1A_394570784	chr1A	394570784	TraesCS1A01G224500	NA	correctChromosome	chr1A_391253406	1A	39.1469
chr1A_394321199	chr1A	394321199	TraesCS1A01G223900	NA	correctChromosome	chr1A_391253406	1A	39.1469
chr1A_396466917	chr1A	396466917	TraesCS1A01G226500	NA	correctChromosome	chr1A_391253406	1A	39.1469
chr1A_392526521	chr1A	392526521	TraesCS1A01G222700	NA	correctChromosome	chr1A_391253406	1A	39.1469
chr1A_391674570	chr1A	391674570	TraesCS1A01G222000	NA	correctChromosome	chr1A_391253406	1A	39.1469
chr1A_397773184	chr1A	397773184	TraesCS1A01G227200	NA	correctChromosome	chr1A_391253406	1A	39.1469
chr1A_394852282	chr1A	394852282	TraesCS1A01G224800	NA	correctChromosome	chr1A_391253406	1A	39.1469
chr1A_397772292	chr1A	397772292	TraesCS1A01G227100	NA	correctChromosome	chr1A_391253406	1A	39.1469
chr1A_397738501	chr1A	397738501	TraesCS1A01G227000	NA	correctChromosome	chr1A_391253406	1A	39.1469
chr1A_395175242	chr1A	395175242	TraesCS1A01G225000	NA	correctChromosome	chr1A_391253406	1A	39.1469
chr1A_390089696	chr1A	390089696	TraesCS1A01G221100	NA	correctChromosome	chr1A_391253406	1A	39.1469
chr1A_398052404	chr1A	398052404	TraesCS1A01G227300	NA	correctChromosome	chr1A_391253406	1A	39.1469
chr1A_394569551	chr1A	394569551	TraesCS1A01G224500	NA	correctChromosome	chr1A_391253406	1A	39.1469
chr1A_391256888	chr1A	391256888	TraesCS1A01G221800	NA	correctChromosome	chr1A_391253406	1A	39.1469
chr1A_396467422	chr1A	396467422	TraesCS1A01G226500	NA	correctChromosome	chr1A_391253406	1A	39.1469
chr1A_391250514	chr1A	391250514	TraesCS1A01G221800	NA	correctChromosome	chr1A_391253406	1A	39.1469
chr1A_397773589	chr1A	397773589	TraesCS1A01G227200	NA	correctChromosome	chr1A_391253406	1A	39.1469
chr1A_396467168	chr1A	396467168	TraesCS1A01G226500	NA	correctChromosome	chr1A_391253406	1A	39.1469
chr1A_397772156	chr1A	397772156	TraesCS1A01G227100	NA	correctChromosome	chr1A_391253406	1A	39.1469
chr1A_42255454	chr1A	42255454	TraesCS1A01G061700	NA	correctChromosome	chr1A_42255454	1A	23.9568
chr1A_49153268	chr1A	49153268	TraesCS1A01G066900	NA	correctChromosome	chr1A_42255454	1A	23.9568
chr1A_432983197	chr1A	432983197	TraesCS1A01G245000	NA	correctChromosome	chr1A_435567120	1A	40.549
chr1A_447642048	chr1A	447642048	TraesCS1A01G255400	NA	correctChromosome	chr1A_435567120	1A	40.549
chr1A_435567120	chr1A	435567120	TraesCS1A01G246100-TraesCS1A01G246200	NA	correctChromosome	chr1A_435567120	1A	40.549
chr1A_462335079	chr1A	462335079	TraesCS1A01G266900	NA	correctChromosome	chr1A_462335079	1A	41.1906
chr1A_459514896	chr1A	459514896	TraesCS1A01G264100	NA	correctChromosome	chr1A_462335079	1A	41.1906
chr1A_462434780	chr1A	462434780	TraesCS1A01G267300	NA	correctChromosome	chr1A_462335079	1A	41.1906
chr1A_462435377	chr1A	462435377	TraesCS1A01G267300	NA	correctChromosome	chr1A_464790878	1A	41.8324
chr1A_464790878	chr1A	464790878	TraesCS1A01G270400	NA	correctChromosome	chr1A_464790878	1A	41.8324
chr1A_462434946	chr1A	462434946	TraesCS1A01G267300	NA	correctChromosome	chr1A_464790878	1A	41.8324
chr1A_462434658	chr1A	462434658	TraesCS1A01G267300	NA	correctChromosome	chr1A_464790878	1A	41.8324
chr1A_462434503	chr1A	462434503	TraesCS1A01G267300	NA	correctChromosome	chr1A_464790878	1A	41.8324
chr1A_474292262	chr1A	474292262	TraesCS1A01G278600	NA	correctChromosome	chr1A_471488518	1A	42.474
chr1A_471478040	chr1A	471478040	TraesCS1A01G276200	NA	correctChromosome	chr1A_471488518	1A	42.474
chr1A_471488518	chr1A	471488518	TraesCS1A01G276300	NA	correctChromosome	chr1A_471488518	1A	42.474
chr1A_471476485	chr1A	471476485	TraesCS1A01G276200	NA	correctChromosome	chr1A_471488518	1A	42.474
chr1A_471476250	chr1A	471476250	TraesCS1A01G276200	NA	correctChromosome	chr1A_471488518	1A	42.474
chr1A_471479200	chr1A	471479200	TraesCS1A01G276200	NA	correctChromosome	chr1A_471488518	1A	42.474
chr1A_471490099	chr1A	471490099	TraesCS1A01G276400	NA	correctChromosome	chr1A_471488518	1A	42.474
chr1A_471476524	chr1A	471476524	TraesCS1A01G276200	NA	correctChromosome	chr1A_471488518	1A	42.474
chr1A_471476594	chr1A	471476594	TraesCS1A01G276200	NA	correctChromosome	chr1A_471488518	1A	42.474
chr1A_471478415	chr1A	471478415	TraesCS1A01G276200	NA	correctChromosome	chr1A_471488518	1A	42.474
chr1A_473009776	chr1A	473009776	TraesCS1A01G277500	NA	correctChromosome	chr1A_473009776	1A	43.3292
chr1A_472167710	chr1A	472167710	TraesCS1A01G277100	NA	correctChromosome	chr1A_473009776	1A	43.3292
chr1A_474189275	chr1A	474189275	TraesCS1A01G278100	NA	correctChromosome	chr1A_473009776	1A	43.3292
chr1A_474293232	chr1A	474293232	TraesCS1A01G278600	NA	correctChromosome	chr1A_473009776	1A	43.3292
chr1A_472169030	chr1A	472169030	TraesCS1A01G277200	NA	correctChromosome	chr1A_473009776	1A	43.3292
chr1A_473011854	chr1A	473011854	TraesCS1A01G277500	NA	correctChromosome	chr1A_473009776	1A	43.3292
chr1A_478258175	chr1A	478258175	TraesCS1A01G280500	NA	correctChromosome	chr1A_474700941	1A	45.6889
chr1A_474449932	chr1A	474449932	TraesCS1A01G278900	NA	correctChromosome	chr1A_474700941	1A	45.6889
chr1A_474700979	chr1A	474700979	TraesCS1A01G279100	NA	correctChromosome	chr1A_474700941	1A	45.6889
chr1A_474450401	chr1A	474450401	TraesCS1A01G278900	NA	correctChromosome	chr1A_474700941	1A	45.6889
chr1A_474700941	chr1A	474700941	TraesCS1A01G279100	NA	correctChromosome	chr1A_474700941	1A	45.6889
chr1A_477736096	chr1A	477736096	TraesCS1A01G280400	NA	correctChromosome	chr1A_474700941	1A	45.6889
chr1A_478258493	chr1A	478258493	TraesCS1A01G280500	NA	correctChromosome	chr1A_474700941	1A	45.6889
chr1A_478258445	chr1A	478258445	TraesCS1A01G280500	NA	correctChromosome	chr1A_474700941	1A	45.6889
chr1A_474703087	chr1A	474703087	TraesCS1A01G279100	NA	correctChromosome	chr1A_474703087	1A	45.0459
chr1A_485005011	chr1A	485005011	TraesCS1A01G287600	NA	correctChromosome	chr1A_483033501	1A	48.7739
chr1A_483196427	chr1A	483196427	TraesCS1A01G286500	NA	correctChromosome	chr1A_483033501	1A	48.7739
chr1A_484335332	chr1A	484335332	TraesCS1A01G287400	NA	correctChromosome	chr1A_483033501	1A	48.7739
chr1A_487012029	chr1A	487012029	TraesCS1A01G290500	NA	correctChromosome	chr1A_483033501	1A	48.7739
chr1A_485353656	chr1A	485353656	TraesCS1A01G288400	NA	correctChromosome	chr1A_483033501	1A	48.7739
chr1A_484335968	chr1A	484335968	TraesCS1A01G287400	NA	correctChromosome	chr1A_483033501	1A	48.7739
chr1A_485356417	chr1A	485356417	TraesCS1A01G288400	NA	correctChromosome	chr1A_483033501	1A	48.7739
chr1A_481655155	chr1A	481655155	TraesCS1A01G283800	NA	correctChromosome	chr1A_483033501	1A	48.7739
chr1A_487732513	chr1A	487732513	TraesCS1A01G292100	NA	correctChromosome	chr1A_483033501	1A	48.7739
chr1A_487731620	chr1A	487731620	TraesCS1A01G292100	NA	correctChromosome	chr1A_483033501	1A	48.7739
chr1A_482337612	chr1A	482337612	TraesCS1A01G285000	NA	correctChromosome	chr1A_483033501	1A	48.7739
chr1A_486052293	chr1A	486052293	TraesCS1A01G288700	NA	correctChromosome	chr1A_483033501	1A	48.7739
chr1A_485561316	chr1A	485561316	TraesCS1A01G288600	NA	correctChromosome	chr1A_483033501	1A	48.7739
chr1A_480830446	chr1A	480830446	TraesCS1A01G283200	NA	correctChromosome	chr1A_483033501	1A	48.7739
chr1A_479840228	chr1A	479840228	TraesCS1A01G281400	NA	correctChromosome	chr1A_483033501	1A	48.7739
chr1A_485343246	chr1A	485343246	TraesCS1A01G288200	NA	correctChromosome	chr1A_483033501	1A	48.7739
chr1A_484335555	chr1A	484335555	TraesCS1A01G287400	NA	correctChromosome	chr1A_483033501	1A	48.7739
chr1A_487464371	chr1A	487464371	TraesCS1A01G291200	NA	correctChromosome	chr1A_483033501	1A	48.7739
chr1A_481649751	chr1A	481649751	TraesCS1A01G283800	NA	correctChromosome	chr1A_483033501	1A	48.7739
chr1A_483195381	chr1A	483195381	TraesCS1A01G286500	NA	correctChromosome	chr1A_483033501	1A	48.7739
chr1A_481651371	chr1A	481651371	TraesCS1A01G283800	NA	correctChromosome	chr1A_483033501	1A	48.7739
chr1A_487015151	chr1A	487015151	TraesCS1A01G290500	NA	correctChromosome	chr1A_483033501	1A	48.7739
chr1A_487728969	chr1A	487728969	TraesCS1A01G292100	NA	correctChromosome	chr1A_483033501	1A	48.7739
chr1A_487728851	chr1A	487728851	TraesCS1A01G292100	NA	correctChromosome	chr1A_483033501	1A	48.7739
chr1A_485000049	chr1A	485000049	TraesCS1A01G287500	NA	correctChromosome	chr1A_483033501	1A	48.7739
chr1A_487733461	chr1A	487733461	TraesCS1A01G292100	NA	correctChromosome	chr1A_483033501	1A	48.7739
chr1A_485356187	chr1A	485356187	TraesCS1A01G288400	NA	correctChromosome	chr1A_483033501	1A	48.7739
chr1A_479835281	chr1A	479835281	TraesCS1A01G281500	NA	correctChromosome	chr1A_483033501	1A	48.7739
chr1A_482336474	chr1A	482336474	TraesCS1A01G285000	NA	correctChromosome	chr1A_483033501	1A	48.7739
chr1A_487492811	chr1A	487492811	TraesCS1A01G291400	NA	correctChromosome	chr1A_483033501	1A	48.7739
chr1A_483195877	chr1A	483195877	TraesCS1A01G286500	NA	correctChromosome	chr1A_483033501	1A	48.7739
chr1A_487731184	chr1A	487731184	TraesCS1A01G292100	NA	correctChromosome	chr1A_483033501	1A	48.7739
chr1A_486341511	chr1A	486341511	TraesCS1A01G289000	NA	correctChromosome	chr1A_483033501	1A	48.7739
chr1A_484334705	chr1A	484334705	TraesCS1A01G287400	NA	correctChromosome	chr1A_483033501	1A	48.7739
chr1A_484335836	chr1A	484335836	TraesCS1A01G287400	NA	correctChromosome	chr1A_483033501	1A	48.7739
chr1A_487492475	chr1A	487492475	TraesCS1A01G291400	NA	correctChromosome	chr1A_483033501	1A	48.7739
chr1A_480546783	chr1A	480546783	TraesCS1A01G281800	NA	correctChromosome	chr1A_483033501	1A	48.7739
chr1A_486663084	chr1A	486663084	TraesCS1A01G289300	NA	correctChromosome	chr1A_483033501	1A	48.7739
chr1A_486052322	chr1A	486052322	TraesCS1A01G288700	NA	correctChromosome	chr1A_483033501	1A	48.7739
chr1A_485343139	chr1A	485343139	TraesCS1A01G288200	NA	correctChromosome	chr1A_483033501	1A	48.7739
chr1A_487017991	chr1A	487017991	TraesCS1A01G290500	NA	correctChromosome	chr1A_483033501	1A	48.7739
chr1A_483033501	chr1A	483033501	TraesCS1A01G286300	NA	correctChromosome	chr1A_483033501	1A	48.7739
chr1A_487728867	chr1A	487728867	TraesCS1A01G292100	NA	correctChromosome	chr1A_483033501	1A	48.7739
chr1A_485558945	chr1A	485558945	TraesCS1A01G288600	NA	correctChromosome	chr1A_483033501	1A	48.7739
chr1A_485357107	chr1A	485357107	TraesCS1A01G288400	NA	correctChromosome	chr1A_483033501	1A	48.7739
chr1A_487728834	chr1A	487728834	TraesCS1A01G292100	NA	correctChromosome	chr1A_483033501	1A	48.7739
chr1A_480831000	chr1A	480831000	TraesCS1A01G283200	NA	correctChromosome	chr1A_483033501	1A	48.7739
chr1A_487728865	chr1A	487728865	TraesCS1A01G292100	NA	correctChromosome	chr1A_483033501	1A	48.7739
chr1A_480833753	chr1A	480833753	TraesCS1A01G283200	NA	correctChromosome	chr1A_483033501	1A	48.7739
chr1A_487492452	chr1A	487492452	TraesCS1A01G291400	NA	correctChromosome	chr1A_483033501	1A	48.7739
chr1A_485341418	chr1A	485341418	TraesCS1A01G288200	NA	correctChromosome	chr1A_485341418	1A	52.6367
chr1A_492123959	chr1A	492123959	TraesCS1A01G297000	NA	correctChromosome	chr1A_485341418	1A	52.6367
chr1A_493819901	chr1A	493819901	TraesCS1A01G298900	NA	correctChromosome	chr1A_493820003	1A	53.4404
chr1A_493820290	chr1A	493820290	TraesCS1A01G298900	NA	correctChromosome	chr1A_493820003	1A	53.4404
chr1A_493819921	chr1A	493819921	TraesCS1A01G298900	NA	correctChromosome	chr1A_493820003	1A	53.4404
chr1A_495284524	chr1A	495284524	TraesCS1A01G300300	NA	correctChromosome	chr1A_493820003	1A	53.4404
chr1A_493216614	chr1A	493216614	TraesCS1A01G298200	NA	correctChromosome	chr1A_493820003	1A	53.4404
chr1A_493820003	chr1A	493820003	TraesCS1A01G298900	NA	correctChromosome	chr1A_493820003	1A	53.4404
chr1A_490411578	chr1A	490411578	TraesCS1A01G295300	NA	correctChromosome	chr1A_493820003	1A	53.4404
chr1A_492125141	chr1A	492125141	TraesCS1A01G297000	NA	correctChromosome	chr1A_493820003	1A	53.4404
chr1A_492124153	chr1A	492124153	TraesCS1A01G297000	NA	correctChromosome	chr1A_493820003	1A	53.4404
chr1A_490411697	chr1A	490411697	TraesCS1A01G295300	NA	correctChromosome	chr1A_493820003	1A	53.4404
chr1A_499196143	chr1A	499196143	TraesCS1A01G307800	NA	correctChromosome	chr1A_499196143	1A	54.2432
chr1A_498048808	chr1A	498048808	TraesCS1A01G305500	NA	correctChromosome	chr1A_499784838	1A	54.9783
chr1A_499195395	chr1A	499195395	TraesCS1A01G307800	NA	correctChromosome	chr1A_499784838	1A	54.9783
chr1A_499189898	chr1A	499189898	TraesCS1A01G307700	NA	correctChromosome	chr1A_499784838	1A	54.9783
chr1A_498167874	chr1A	498167874	TraesCS1A01G305900	NA	correctChromosome	chr1A_499784838	1A	54.9783
chr1A_496476758	chr1A	496476758	TraesCS1A01G302900	NA	correctChromosome	chr1A_499784838	1A	54.9783
chr1A_498450977	chr1A	498450977	TraesCS1A01G306200	NA	correctChromosome	chr1A_499784838	1A	54.9783
chr1A_499195451	chr1A	499195451	TraesCS1A01G307800	NA	correctChromosome	chr1A_499784838	1A	54.9783
chr1A_498596677	chr1A	498596677	TraesCS1A01G306500	NA	correctChromosome	chr1A_499784838	1A	54.9783
chr1A_498807151	chr1A	498807151	TraesCS1A01G307300	NA	correctChromosome	chr1A_499784838	1A	54.9783
chr1A_503307501	chr1A	503307501	TraesCS1A01G311400	NA	correctChromosome	chr1A_499784838	1A	54.9783
chr1A_499194678	chr1A	499194678	TraesCS1A01G307800	NA	correctChromosome	chr1A_499784838	1A	54.9783
chr1A_499194677	chr1A	499194677	TraesCS1A01G307800	NA	correctChromosome	chr1A_499784838	1A	54.9783
chr1A_499447976	chr1A	499447976	TraesCS1A01G308100	NA	correctChromosome	chr1A_499784838	1A	54.9783
chr1A_499450423	chr1A	499450423	TraesCS1A01G308100	NA	correctChromosome	chr1A_499784838	1A	54.9783
chr1A_498811477	chr1A	498811477	TraesCS1A01G307300	NA	correctChromosome	chr1A_499784838	1A	54.9783
chr1A_498807548	chr1A	498807548	TraesCS1A01G307300	NA	correctChromosome	chr1A_499784838	1A	54.9783
chr1A_499784782	chr1A	499784782	TraesCS1A01G308700	NA	correctChromosome	chr1A_499784838	1A	54.9783
chr1A_499795456	chr1A	499795456	TraesCS1A01G308900	NA	correctChromosome	chr1A_499784838	1A	54.9783
chr1A_498811359	chr1A	498811359	TraesCS1A01G307300	NA	correctChromosome	chr1A_499784838	1A	54.9783
chr1A_498141767	chr1A	498141767	TraesCS1A01G305700	NA	correctChromosome	chr1A_499784838	1A	54.9783
chr1A_497865347	chr1A	497865347	TraesCS1A01G305200	NA	correctChromosome	chr1A_499784838	1A	54.9783
chr1A_499784838	chr1A	499784838	TraesCS1A01G308700	NA	correctChromosome	chr1A_499784838	1A	54.9783
chr1A_499783382	chr1A	499783382	TraesCS1A01G308700	NA	correctChromosome	chr1A_499784838	1A	54.9783
chr1A_498808399	chr1A	498808399	TraesCS1A01G307300	NA	correctChromosome	chr1A_499784838	1A	54.9783
chr1A_497902351	chr1A	497902351	TraesCS1A01G305300	NA	correctChromosome	chr1A_499784838	1A	54.9783
chr1A_499634564	chr1A	499634564	TraesCS1A01G308400	NA	correctChromosome	chr1A_499784838	1A	54.9783
chr1A_498166713	chr1A	498166713	TraesCS1A01G305800	NA	correctChromosome	chr1A_499784838	1A	54.9783
chr1A_498141736	chr1A	498141736	TraesCS1A01G305700	NA	correctChromosome	chr1A_499784838	1A	54.9783
chr1A_499446989	chr1A	499446989	TraesCS1A01G308000	NA	correctChromosome	chr1A_499784838	1A	54.9783
chr1A_499983033	chr1A	499983033	TraesCS1A01G309200	NA	correctChromosome	chr1A_499784838	1A	54.9783
chr1A_499735918	chr1A	499735918	TraesCS1A01G308500	NA	correctChromosome	chr1A_499784838	1A	54.9783
chr1A_499189893	chr1A	499189893	TraesCS1A01G307700	NA	correctChromosome	chr1A_499784838	1A	54.9783
chr1A_499795443	chr1A	499795443	TraesCS1A01G308900	NA	correctChromosome	chr1A_499784838	1A	54.9783
chr1A_499983164	chr1A	499983164	TraesCS1A01G309200	NA	correctChromosome	chr1A_499784838	1A	54.9783
chr1A_503312413	chr1A	503312413	TraesCS1A01G311400	NA	correctChromosome	chr1A_503312413	1A	55.7134
chr1A_503308064	chr1A	503308064	TraesCS1A01G311400	NA	correctChromosome	chr1A_503312413	1A	55.7134
chr1A_502679435	chr1A	502679435	TraesCS1A01G311000	NA	correctChromosome	chr1A_503312413	1A	55.7134
chr1A_500378471	chr1A	500378471	TraesCS1A01G309500-TraesCS1A01G309600	NA	correctChromosome	chr1A_503312413	1A	55.7134
chr1A_503313566	chr1A	503313566	TraesCS1A01G311400	NA	correctChromosome	chr1A_503312413	1A	55.7134
chr1A_501706711	chr1A	501706711	TraesCS1A01G310700	NA	correctChromosome	chr1A_503312413	1A	55.7134
chr1A_500560042	chr1A	500560042	TraesCS1A01G309600	NA	correctChromosome	chr1A_503312413	1A	55.7134
chr1A_503310152	chr1A	503310152	TraesCS1A01G311400	NA	correctChromosome	chr1A_503312413	1A	55.7134
chr1A_503314932	chr1A	503314932	TraesCS1A01G311400	NA	correctChromosome	chr1A_503314926	1A	57.4793
chr1A_503314926	chr1A	503314926	TraesCS1A01G311400	NA	correctChromosome	chr1A_503314926	1A	57.4793
chr1A_504406099	chr1A	504406099	TraesCS1A01G312500-TraesCS1A01G312600	NA	correctChromosome	chr1A_504399900	1A	57.5614
chr1A_504398590	chr1A	504398590	TraesCS1A01G312500	NA	correctChromosome	chr1A_504399900	1A	57.5614
chr1A_504405929	chr1A	504405929	TraesCS1A01G312500-TraesCS1A01G312600	NA	correctChromosome	chr1A_504399900	1A	57.5614
chr1A_507874441	chr1A	507874441	TraesCS1A01G315700-TraesCS1A01G315800	NA	correctChromosome	chr1A_504399900	1A	57.5614
chr1A_504405761	chr1A	504405761	TraesCS1A01G312500-TraesCS1A01G312600	NA	correctChromosome	chr1A_504399900	1A	57.5614
chr1A_504399671	chr1A	504399671	TraesCS1A01G312500	NA	correctChromosome	chr1A_504399900	1A	57.5614
chr1A_507875747	chr1A	507875747	TraesCS1A01G315700-TraesCS1A01G315800	NA	correctChromosome	chr1A_504399900	1A	57.5614
chr1A_504399900	chr1A	504399900	TraesCS1A01G312500	NA	correctChromosome	chr1A_504399900	1A	57.5614
chr1A_504400683	chr1A	504400683	TraesCS1A01G312500	NA	correctChromosome	chr1A_504399900	1A	57.5614
chr1A_504405767	chr1A	504405767	TraesCS1A01G312500-TraesCS1A01G312600	NA	correctChromosome	chr1A_504399900	1A	57.5614
chr1A_510378656	chr1A	510378656	TraesCS1A01G319600	NA	correctChromosome	chr1A_506854760	1A	60.9241
chr1A_506855550	chr1A	506855550	TraesCS1A01G315300	NA	correctChromosome	chr1A_506854760	1A	60.9241
chr1A_507076449	chr1A	507076449	TraesCS1A01G315500	NA	correctChromosome	chr1A_506854760	1A	60.9241
chr1A_506854760	chr1A	506854760	TraesCS1A01G315300	NA	correctChromosome	chr1A_506854760	1A	60.9241
chr1A_508036437	chr1A	508036437	TraesCS1A01G315800-TraesCS1A01G315900	NA	correctChromosome	chr1A_506854760	1A	60.9241
chr1A_508035864	chr1A	508035864	TraesCS1A01G315800-TraesCS1A01G315900	NA	correctChromosome	chr1A_506854760	1A	60.9241
chr1A_507001634	chr1A	507001634	TraesCS1A01G315400	NA	correctChromosome	chr1A_506854760	1A	60.9241
chr1A_507874547	chr1A	507874547	TraesCS1A01G315700-TraesCS1A01G315800	NA	correctChromosome	chr1A_506854760	1A	60.9241
chr1A_506854528	chr1A	506854528	TraesCS1A01G315300	NA	correctChromosome	chr1A_506854760	1A	60.9241
chr1A_506854540	chr1A	506854540	TraesCS1A01G315300	NA	correctChromosome	chr1A_506854760	1A	60.9241
chr1A_508036557	chr1A	508036557	TraesCS1A01G315800-TraesCS1A01G315900	NA	correctChromosome	chr1A_506854760	1A	60.9241
chr1A_507078569	chr1A	507078569	TraesCS1A01G315500	NA	correctChromosome	chr1A_506854760	1A	60.9241
chr1A_506854579	chr1A	506854579	TraesCS1A01G315300	NA	correctChromosome	chr1A_506854760	1A	60.9241
chr1A_507875153	chr1A	507875153	TraesCS1A01G315700-TraesCS1A01G315800	NA	correctChromosome	chr1A_506854760	1A	60.9241
chr1A_508036419	chr1A	508036419	TraesCS1A01G315800-TraesCS1A01G315900	NA	correctChromosome	chr1A_506854760	1A	60.9241
chr1A_507082667	chr1A	507082667	TraesCS1A01G315600	NA	correctChromosome	chr1A_506854760	1A	60.9241
chr1A_508961094	chr1A	508961094	TraesCS1A01G317700	NA	correctChromosome	chr1A_510366402	1A	63.6334
chr1A_510379603	chr1A	510379603	TraesCS1A01G319600	NA	correctChromosome	chr1A_510366402	1A	63.6334
chr1A_508153671	chr1A	508153671	TraesCS1A01G315900	NA	correctChromosome	chr1A_510366402	1A	63.6334
chr1A_510366402	chr1A	510366402	TraesCS1A01G319400	NA	correctChromosome	chr1A_510366402	1A	63.6334
chr1A_511100027	chr1A	511100027	TraesCS1A01G320500	NA	correctChromosome	chr1A_510366402	1A	63.6334
chr1A_510366245	chr1A	510366245	TraesCS1A01G319400	NA	correctChromosome	chr1A_510366402	1A	63.6334
chr1A_508961856	chr1A	508961856	TraesCS1A01G317700	NA	correctChromosome	chr1A_510366402	1A	63.6334
chr1A_510366683	chr1A	510366683	TraesCS1A01G319400	NA	correctChromosome	chr1A_510366402	1A	63.6334
chr1A_514138345	chr1A	514138345	TraesCS1A01G323600	NA	correctChromosome	chr1A_514136295	1A	64.7643
chr1A_514137637	chr1A	514137637	TraesCS1A01G323600	NA	correctChromosome	chr1A_514136295	1A	64.7643
chr1A_514135817	chr1A	514135817	TraesCS1A01G323600	NA	correctChromosome	chr1A_514136295	1A	64.7643
chr1A_514136129	chr1A	514136129	TraesCS1A01G323600	NA	correctChromosome	chr1A_514136295	1A	64.7643
chr1A_514136036	chr1A	514136036	TraesCS1A01G323600	NA	correctChromosome	chr1A_514136295	1A	64.7643
chr1A_514553051	chr1A	514553051	TraesCS1A01G323900	NA	correctChromosome	chr1A_514136295	1A	64.7643
chr1A_514136295	chr1A	514136295	TraesCS1A01G323600	NA	correctChromosome	chr1A_514136295	1A	64.7643
chr1A_514138204	chr1A	514138204	TraesCS1A01G323600	NA	correctChromosome	chr1A_514136295	1A	64.7643
chr1A_514136367	chr1A	514136367	TraesCS1A01G323600	NA	correctChromosome	chr1A_514136295	1A	64.7643
chr1A_514138101	chr1A	514138101	TraesCS1A01G323600	NA	correctChromosome	chr1A_514136295	1A	64.7643
chr1A_514139063	chr1A	514139063	TraesCS1A01G323600	NA	correctChromosome	chr1A_514136295	1A	64.7643
chr1A_514137582	chr1A	514137582	TraesCS1A01G323600	NA	correctChromosome	chr1A_514136295	1A	64.7643
chr1A_515551898	chr1A	515551898	TraesCS1A01G324800	NA	correctChromosome	chr1A_516373227	1A	66.0489
chr1A_516378456	chr1A	516378456	TraesCS1A01G325500	NA	correctChromosome	chr1A_516373227	1A	66.0489
chr1A_515549113	chr1A	515549113	TraesCS1A01G324800	NA	correctChromosome	chr1A_516373227	1A	66.0489
chr1A_516375804	chr1A	516375804	TraesCS1A01G325500	NA	correctChromosome	chr1A_516373227	1A	66.0489
chr1A_515554335	chr1A	515554335	TraesCS1A01G324800	NA	correctChromosome	chr1A_516373227	1A	66.0489
chr1A_515551882	chr1A	515551882	TraesCS1A01G324800	NA	correctChromosome	chr1A_516373227	1A	66.0489
chr1A_515554118	chr1A	515554118	TraesCS1A01G324800	NA	correctChromosome	chr1A_516373227	1A	66.0489
chr1A_516377512	chr1A	516377512	TraesCS1A01G325500	NA	correctChromosome	chr1A_516373227	1A	66.0489
chr1A_515552339	chr1A	515552339	TraesCS1A01G324800	NA	correctChromosome	chr1A_516373227	1A	66.0489
chr1A_515553383	chr1A	515553383	TraesCS1A01G324800	NA	correctChromosome	chr1A_516373227	1A	66.0489
chr1A_515549158	chr1A	515549158	TraesCS1A01G324800	NA	correctChromosome	chr1A_516373227	1A	66.0489
chr1A_516378376	chr1A	516378376	TraesCS1A01G325500	NA	correctChromosome	chr1A_516373227	1A	66.0489
chr1A_515553706	chr1A	515553706	TraesCS1A01G324800	NA	correctChromosome	chr1A_516373227	1A	66.0489
chr1A_515553365	chr1A	515553365	TraesCS1A01G324800	NA	correctChromosome	chr1A_516373227	1A	66.0489
chr1A_516377103	chr1A	516377103	TraesCS1A01G325400	NA	correctChromosome	chr1A_516373227	1A	66.0489
chr1A_515546052	chr1A	515546052	TraesCS1A01G324800	NA	correctChromosome	chr1A_516373227	1A	66.0489
chr1A_516373227	chr1A	516373227	TraesCS1A01G325500	NA	correctChromosome	chr1A_516373227	1A	66.0489
chr1A_515554488	chr1A	515554488	TraesCS1A01G324800	NA	correctChromosome	chr1A_516373227	1A	66.0489
chr1A_516568438	chr1A	516568438	TraesCS1A01G325900	NA	correctChromosome	chr1A_516564613	1A	66.6912
chr1A_516570938	chr1A	516570938	TraesCS1A01G325900	NA	correctChromosome	chr1A_516564613	1A	66.6912
chr1A_516565932	chr1A	516565932	TraesCS1A01G325900	NA	correctChromosome	chr1A_516564613	1A	66.6912
chr1A_516564613	chr1A	516564613	TraesCS1A01G325900	NA	correctChromosome	chr1A_516564613	1A	66.6912
chr1A_516563922	chr1A	516563922	TraesCS1A01G325900	NA	correctChromosome	chr1A_516564613	1A	66.6912
chr1A_516573408	chr1A	516573408	TraesCS1A01G325900	NA	correctChromosome	chr1A_516564613	1A	66.6912
chr1A_516564136	chr1A	516564136	TraesCS1A01G325900	NA	correctChromosome	chr1A_516564613	1A	66.6912
chr1A_516627179	chr1A	516627179	TraesCS1A01G326200	NA	correctChromosome	chr1A_516773018	1A	67.3333
chr1A_516772920	chr1A	516772920	TraesCS1A01G327000	NA	correctChromosome	chr1A_516773018	1A	67.3333
chr1A_516773018	chr1A	516773018	TraesCS1A01G327000	NA	correctChromosome	chr1A_516773018	1A	67.3333
chr1A_517488899	chr1A	517488899	TraesCS1A01G328400	NA	correctChromosome	chr1A_517489581	1A	67.9755
chr1A_517489581	chr1A	517489581	TraesCS1A01G328400	NA	correctChromosome	chr1A_517489581	1A	67.9755
chr1A_517487749	chr1A	517487749	TraesCS1A01G328400	NA	correctChromosome	chr1A_517489581	1A	67.9755
chr1A_517488745	chr1A	517488745	TraesCS1A01G328400	NA	correctChromosome	chr1A_517489581	1A	67.9755
chr1A_517488331	chr1A	517488331	TraesCS1A01G328400	NA	correctChromosome	chr1A_517489581	1A	67.9755
chr1A_517487780	chr1A	517487780	TraesCS1A01G328400	NA	correctChromosome	chr1A_517489581	1A	67.9755
chr1A_517488179	chr1A	517488179	TraesCS1A01G328400	NA	correctChromosome	chr1A_517489581	1A	67.9755
chr1A_517487775	chr1A	517487775	TraesCS1A01G328400	NA	correctChromosome	chr1A_517489581	1A	67.9755
chr1A_518018971	chr1A	518018971	TraesCS1A01G329200	NA	correctChromosome	chr1A_518021331	1A	71.1899
chr1A_518021331	chr1A	518021331	TraesCS1A01G329200	NA	correctChromosome	chr1A_518021331	1A	71.1899
chr1A_518015796	chr1A	518015796	TraesCS1A01G329200	NA	correctChromosome	chr1A_518021331	1A	71.1899
chr1A_518019189	chr1A	518019189	TraesCS1A01G329200	NA	correctChromosome	chr1A_518021331	1A	71.1899
chr1A_518701511	chr1A	518701511	TraesCS1A01G329700-TraesCS1A01G329800	NA	correctChromosome	chr1A_518701511	1A	71.832
chr1A_520583985	chr1A	520583985	TraesCS1A01G331900	NA	correctChromosome	chr1A_520580210	1A	76.096
chr1A_520789261	chr1A	520789261	TraesCS1A01G332200	NA	correctChromosome	chr1A_520580210	1A	76.096
chr1A_520580249	chr1A	520580249	TraesCS1A01G331900	NA	correctChromosome	chr1A_520580210	1A	76.096
chr1A_520580262	chr1A	520580262	TraesCS1A01G331900	NA	correctChromosome	chr1A_520580210	1A	76.096
chr1A_520580210	chr1A	520580210	TraesCS1A01G331900	NA	correctChromosome	chr1A_520580210	1A	76.096
chr1A_520584481	chr1A	520584481	TraesCS1A01G331900	NA	correctChromosome	chr1A_520580210	1A	76.096
chr1A_520580300	chr1A	520580300	TraesCS1A01G331900	NA	correctChromosome	chr1A_520580210	1A	76.096
chr1A_520580408	chr1A	520580408	TraesCS1A01G331900	NA	correctChromosome	chr1A_520580210	1A	76.096
chr1A_520940129	chr1A	520940129	TraesCS1A01G332600	NA	correctChromosome	chr1A_520940129	1A	72.4742
chr1A_520814418	chr1A	520814418	TraesCS1A01G332400	NA	correctChromosome	chr1A_520940129	1A	72.4742
chr1A_530173758	chr1A	530173758	TraesCS1A01G339600	NA	correctChromosome	chr1A_521977891	1A	76.7856
chr1A_522234599	chr1A	522234599	TraesCS1A01G334900	NA	correctChromosome	chr1A_521977891	1A	76.7856
chr1A_522881590	chr1A	522881590	TraesCS1A01G335800	NA	correctChromosome	chr1A_521977891	1A	76.7856
chr1A_521978001	chr1A	521978001	TraesCS1A01G334700	NA	correctChromosome	chr1A_521977891	1A	76.7856
chr1A_521978030	chr1A	521978030	TraesCS1A01G334700	NA	correctChromosome	chr1A_521977891	1A	76.7856
chr1A_527974139	chr1A	527974139	TraesCS1A01G338400	NA	correctChromosome	chr1A_521977891	1A	76.7856
chr1A_522881668	chr1A	522881668	TraesCS1A01G335800	NA	correctChromosome	chr1A_521977891	1A	76.7856
chr1A_522881686	chr1A	522881686	TraesCS1A01G335800	NA	correctChromosome	chr1A_521977891	1A	76.7856
chr1A_522535135	chr1A	522535135	TraesCS1A01G335700	NA	correctChromosome	chr1A_521977891	1A	76.7856
chr1A_527959445	chr1A	527959445	TraesCS1A01G338300	NA	correctChromosome	chr1A_521977891	1A	76.7856
chr1A_530178244	chr1A	530178244	TraesCS1A01G339700	NA	correctChromosome	chr1A_521977891	1A	76.7856
chr1A_530513797	chr1A	530513797	TraesCS1A01G340200	NA	correctChromosome	chr1A_521977891	1A	76.7856
chr1A_522955667	chr1A	522955667	TraesCS1A01G336000	NA	correctChromosome	chr1A_521977891	1A	76.7856
chr1A_528669193	chr1A	528669193	TraesCS1A01G338900	NA	correctChromosome	chr1A_521977891	1A	76.7856
chr1A_528666184	chr1A	528666184	TraesCS1A01G338900	NA	correctChromosome	chr1A_521977891	1A	76.7856
chr1A_522882050	chr1A	522882050	TraesCS1A01G335800	NA	correctChromosome	chr1A_521977891	1A	76.7856
chr1A_522234134	chr1A	522234134	TraesCS1A01G334900	NA	correctChromosome	chr1A_521977891	1A	76.7856
chr1A_522882515	chr1A	522882515	TraesCS1A01G335800	NA	correctChromosome	chr1A_521977891	1A	76.7856
chr1A_530173234	chr1A	530173234	TraesCS1A01G339600	NA	correctChromosome	chr1A_521977891	1A	76.7856
chr1A_527959214	chr1A	527959214	TraesCS1A01G338200	NA	correctChromosome	chr1A_521977891	1A	76.7856
chr1A_528064444	chr1A	528064444	TraesCS1A01G338500	NA	correctChromosome	chr1A_521977891	1A	76.7856
chr1A_528669192	chr1A	528669192	TraesCS1A01G338900	NA	correctChromosome	chr1A_521977891	1A	76.7856
chr1A_530171766	chr1A	530171766	TraesCS1A01G339600	NA	correctChromosome	chr1A_521977891	1A	76.7856
chr1A_522882742	chr1A	522882742	TraesCS1A01G335800	NA	correctChromosome	chr1A_521977891	1A	76.7856
chr1A_530173432	chr1A	530173432	TraesCS1A01G339600	NA	correctChromosome	chr1A_521977891	1A	76.7856
chr1A_522954985	chr1A	522954985	TraesCS1A01G336000	NA	correctChromosome	chr1A_521977891	1A	76.7856
chr1A_528668864	chr1A	528668864	TraesCS1A01G338900	NA	correctChromosome	chr1A_521977891	1A	76.7856
chr1A_521977891	chr1A	521977891	TraesCS1A01G334700	NA	correctChromosome	chr1A_521977891	1A	76.7856
chr1A_522954695	chr1A	522954695	TraesCS1A01G336000	NA	correctChromosome	chr1A_521977891	1A	76.7856
chr1A_530211470	chr1A	530211470	TraesCS1A01G339900	NA	correctChromosome	chr1A_530211906	1A	78.6906
chr1A_530211906	chr1A	530211906	TraesCS1A01G339900	NA	correctChromosome	chr1A_530211906	1A	78.6906
chr1A_530214995	chr1A	530214995	TraesCS1A01G339900	NA	correctChromosome	chr1A_530211906	1A	78.6906
chr1A_530213616	chr1A	530213616	TraesCS1A01G339900	NA	correctChromosome	chr1A_530211906	1A	78.6906
chr1A_530598053	chr1A	530598053	TraesCS1A01G340400	NA	correctChromosome	chr1A_530596108	1A	79.1114
chr1A_530596108	chr1A	530596108	TraesCS1A01G340400	NA	correctChromosome	chr1A_530596108	1A	79.1114
chr1A_530594328	chr1A	530594328	TraesCS1A01G340400	NA	correctChromosome	chr1A_530596108	1A	79.1114
chr1A_530884241	chr1A	530884241	TraesCS1A01G341200	NA	correctChromosome	chr1A_531603893	1A	82.3963
chr1A_531603796	chr1A	531603796	TraesCS1A01G342500	NA	correctChromosome	chr1A_531603893	1A	82.3963
chr1A_531228488	chr1A	531228488	TraesCS1A01G341700	NA	correctChromosome	chr1A_531603893	1A	82.3963
chr1A_531603893	chr1A	531603893	TraesCS1A01G342500	NA	correctChromosome	chr1A_531603893	1A	82.3963
chr1A_532089474	chr1A	532089474	TraesCS1A01G343700	NA	correctChromosome	chr1A_531603893	1A	82.3963
chr1A_531686279	chr1A	531686279	TraesCS1A01G342900	NA	correctChromosome	chr1A_531603893	1A	82.3963
chr1A_530884098	chr1A	530884098	TraesCS1A01G341200	NA	correctChromosome	chr1A_531603893	1A	82.3963
chr1A_531237628	chr1A	531237628	TraesCS1A01G341800	NA	correctChromosome	chr1A_531603893	1A	82.3963
chr1A_532246897	chr1A	532246897	TraesCS1A01G344000	NA	correctChromosome	chr1A_532251660	1A	83.3475
chr1A_532247085	chr1A	532247085	TraesCS1A01G344000	NA	correctChromosome	chr1A_532251660	1A	83.3475
chr1A_532253766	chr1A	532253766	TraesCS1A01G344000	NA	correctChromosome	chr1A_532251660	1A	83.3475
chr1A_532252644	chr1A	532252644	TraesCS1A01G344000	NA	correctChromosome	chr1A_532251660	1A	83.3475
chr1A_532252587	chr1A	532252587	TraesCS1A01G344000	NA	correctChromosome	chr1A_532251660	1A	83.3475
chr1A_532248055	chr1A	532248055	TraesCS1A01G344000	NA	correctChromosome	chr1A_532251660	1A	83.3475
chr1A_532251660	chr1A	532251660	TraesCS1A01G344000	NA	correctChromosome	chr1A_532251660	1A	83.3475
chr1A_532251229	chr1A	532251229	TraesCS1A01G344000	NA	correctChromosome	chr1A_532251660	1A	83.3475
chr1A_532253086	chr1A	532253086	TraesCS1A01G344000	NA	correctChromosome	chr1A_532251660	1A	83.3475
chr1A_533147776	chr1A	533147776	TraesCS1A01G346700	NA	correctChromosome	chr1A_533147776	1A	84.2986
chr1A_535064592	chr1A	535064592	TraesCS1A01G350200	NA	correctChromosome	chr1A_535027905	1A	84.9399
chr1A_535027905	chr1A	535027905	TraesCS1A01G350100	NA	correctChromosome	chr1A_535027905	1A	84.9399
chr1A_535316496	chr1A	535316496	TraesCS1A01G350500	NA	correctChromosome	chr1A_535027905	1A	84.9399
chr1A_535315602	chr1A	535315602	TraesCS1A01G350500	NA	correctChromosome	chr1A_535027905	1A	84.9399
chr1A_535315342	chr1A	535315342	TraesCS1A01G350500	NA	correctChromosome	chr1A_535027905	1A	84.9399
chr1A_535027925	chr1A	535027925	TraesCS1A01G350100	NA	correctChromosome	chr1A_535027905	1A	84.9399
chr1A_535445590	chr1A	535445590	TraesCS1A01G350900	NA	correctChromosome	chr1A_535445590	1A	85.2546
chr1A_540048458	chr1A	540048458	TraesCS1A01G357500	NA	correctChromosome	chr1A_536963474	1A	86.613
chr1A_536963474	chr1A	536963474	TraesCS1A01G353300	NA	correctChromosome	chr1A_536963474	1A	86.613
chr1A_536965735	chr1A	536965735	TraesCS1A01G353300	NA	correctChromosome	chr1A_536963474	1A	86.613
chr1A_536964237	chr1A	536964237	TraesCS1A01G353300	NA	correctChromosome	chr1A_536963474	1A	86.613
chr1A_540051072	chr1A	540051072	TraesCS1A01G357500	NA	correctChromosome	chr1A_537965047	1A	87.6704
chr1A_537070425	chr1A	537070425	TraesCS1A01G353800	NA	correctChromosome	chr1A_537965047	1A	87.6704
chr1A_537354700	chr1A	537354700	TraesCS1A01G354400	NA	correctChromosome	chr1A_537965047	1A	87.6704
chr1A_539971315	chr1A	539971315	TraesCS1A01G357300	NA	correctChromosome	chr1A_537965047	1A	87.6704
chr1A_537965047	chr1A	537965047	TraesCS1A01G355200	NA	correctChromosome	chr1A_537965047	1A	87.6704
chr1A_537531238	chr1A	537531238	TraesCS1A01G354500	NA	correctChromosome	chr1A_537965047	1A	87.6704
chr1A_537975982	chr1A	537975982	TraesCS1A01G355500	NA	correctChromosome	chr1A_537965047	1A	87.6704
chr1A_537355984	chr1A	537355984	TraesCS1A01G354400	NA	correctChromosome	chr1A_537965047	1A	87.6704
chr1A_537356566	chr1A	537356566	TraesCS1A01G354400	NA	correctChromosome	chr1A_537965047	1A	87.6704
chr1A_537973868	chr1A	537973868	TraesCS1A01G355400	NA	correctChromosome	chr1A_537965047	1A	87.6704
chr1A_537352822	chr1A	537352822	TraesCS1A01G354300	NA	correctChromosome	chr1A_537965047	1A	87.6704
chr1A_540051810	chr1A	540051810	TraesCS1A01G357500	NA	correctChromosome	chr1A_537965047	1A	87.6704
chr1A_537543108	chr1A	537543108	TraesCS1A01G354700	NA	correctChromosome	chr1A_537965047	1A	87.6704
chr1A_540056726	chr1A	540056726	TraesCS1A01G357500	NA	correctChromosome	chr1A_540056687	1A	89.3696
chr1A_540056617	chr1A	540056617	TraesCS1A01G357500	NA	correctChromosome	chr1A_540056687	1A	89.3696
chr1A_540056355	chr1A	540056355	TraesCS1A01G357500	NA	correctChromosome	chr1A_540056687	1A	89.3696
chr1A_540056687	chr1A	540056687	TraesCS1A01G357500	NA	correctChromosome	chr1A_540056687	1A	89.3696
chr1A_540337212	chr1A	540337212	TraesCS1A01G358600	NA	correctChromosome	chr1A_540146970	1A	90.0112
chr1A_540143911	chr1A	540143911	TraesCS1A01G357900	NA	correctChromosome	chr1A_540146970	1A	90.0112
chr1A_540337257	chr1A	540337257	TraesCS1A01G358600	NA	correctChromosome	chr1A_540146970	1A	90.0112
chr1A_540144194	chr1A	540144194	TraesCS1A01G357900	NA	correctChromosome	chr1A_540146970	1A	90.0112
chr1A_540145112	chr1A	540145112	TraesCS1A01G357900	NA	correctChromosome	chr1A_540146970	1A	90.0112
chr1A_540146970	chr1A	540146970	TraesCS1A01G357900	NA	correctChromosome	chr1A_540146970	1A	90.0112
chr1A_541987229	chr1A	541987229	TraesCS1A01G361000	NA	correctChromosome	chr1A_541997786	1A	90.6526
chr1A_541997786	chr1A	541997786	TraesCS1A01G361300	NA	correctChromosome	chr1A_541997786	1A	90.6526
chr1A_542142555	chr1A	542142555	TraesCS1A01G361500	NA	correctChromosome	chr1A_541997786	1A	90.6526
chr1A_541984128	chr1A	541984128	TraesCS1A01G361000	NA	correctChromosome	chr1A_541997786	1A	90.6526
chr1A_541987259	chr1A	541987259	TraesCS1A01G361000	NA	correctChromosome	chr1A_541997786	1A	90.6526
chr1A_544057999	chr1A	544057999	TraesCS1A01G363800	NA	correctChromosome	chr1A_544057999	1A	91.6004
chr1A_568388811	chr1A	568388811	TraesCS1A01G405200	NA	correctChromosome	chr1A_550422497	1A	94.3152
chr1A_550111433	chr1A	550111433	TraesCS1A01G375200	NA	correctChromosome	chr1A_550422497	1A	94.3152
chr1A_550422485	chr1A	550422485	TraesCS1A01G375900	NA	correctChromosome	chr1A_550422497	1A	94.3152
chr1A_550422497	chr1A	550422497	TraesCS1A01G375900	NA	correctChromosome	chr1A_550422497	1A	94.3152
chr1A_567976548	chr1A	567976548	TraesCS1A01G404300	NA	correctChromosome	chr1A_550422497	1A	94.3152
chr1A_570145493	chr1A	570145493	TraesCS1A01G407700	NA	correctChromosome	chr1A_550422497	1A	94.3152
chr1A_566497518	chr1A	566497518	TraesCS1A01G403100	NA	correctChromosome	chr1A_550422497	1A	94.3152
chr1A_550443550	chr1A	550443550	TraesCS1A01G376100	NA	correctChromosome	chr1A_550443550	1A	92.7043
chr1A_558514317	chr1A	558514317	TraesCS1A01G391600	NA	correctChromosome	chr1A_558591873	1A	96.4968
chr1A_558591873	chr1A	558591873	TraesCS1A01G392000	NA	correctChromosome	chr1A_558591873	1A	96.4968
chr1A_558509976	chr1A	558509976	TraesCS1A01G391600	NA	correctChromosome	chr1A_558591873	1A	96.4968
chr1A_567974041	chr1A	567974041	TraesCS1A01G404300	NA	correctChromosome	chr1A_564278179	1A	92.5481
chr1A_566486023	chr1A	566486023	TraesCS1A01G402900	NA	correctChromosome	chr1A_564278179	1A	92.5481
chr1A_568393709	chr1A	568393709	TraesCS1A01G405300	NA	correctChromosome	chr1A_564278179	1A	92.5481
chr1A_567634523	chr1A	567634523	TraesCS1A01G404200	NA	correctChromosome	chr1A_564278179	1A	92.5481
chr1A_567326606	chr1A	567326606	TraesCS1A01G403900	NA	correctChromosome	chr1A_564278179	1A	92.5481
chr1A_547965988	chr1A	547965988	TraesCS1A01G370800	NA	correctChromosome	chr1A_564278179	1A	92.5481
chr1A_568394836	chr1A	568394836	TraesCS1A01G405400	NA	correctChromosome	chr1A_564278179	1A	92.5481
chr1A_564300728	chr1A	564300728	TraesCS1A01G400300	NA	correctChromosome	chr1A_564278179	1A	92.5481
chr1A_567976320	chr1A	567976320	TraesCS1A01G404300	NA	correctChromosome	chr1A_564278179	1A	92.5481
chr1A_571789641	chr1A	571789641	TraesCS1A01G410800	NA	correctChromosome	chr1A_564278179	1A	92.5481
chr1A_558550198	chr1A	558550198	TraesCS1A01G391900	NA	correctChromosome	chr1A_564278179	1A	92.5481
chr1A_564279191	chr1A	564279191	TraesCS1A01G400200	NA	correctChromosome	chr1A_564278179	1A	92.5481
chr1A_564310004	chr1A	564310004	TraesCS1A01G400300	NA	correctChromosome	chr1A_564278179	1A	92.5481
chr1A_570142254	chr1A	570142254	TraesCS1A01G407700	NA	correctChromosome	chr1A_564278179	1A	92.5481
chr1A_554534821	chr1A	554534821	TraesCS1A01G385400	NA	correctChromosome	chr1A_564278179	1A	92.5481
chr1A_564278179	chr1A	564278179	TraesCS1A01G400200	NA	correctChromosome	chr1A_564278179	1A	92.5481
chr1A_564300673	chr1A	564300673	TraesCS1A01G400300	NA	correctChromosome	chr1A_564278179	1A	92.5481
chr1A_557955238	chr1A	557955238	TraesCS1A01G390300	NA	correctChromosome	chr1A_564278179	1A	92.5481
chr1A_566499838	chr1A	566499838	TraesCS1A01G403200	NA	correctChromosome	chr1A_564278179	1A	92.5481
chr1A_550442076	chr1A	550442076	TraesCS1A01G376100	NA	correctChromosome	chr1A_564278179	1A	92.5481
chr1A_564302528	chr1A	564302528	TraesCS1A01G400300	NA	correctChromosome	chr1A_564278179	1A	92.5481
chr1A_568547454	chr1A	568547454	TraesCS1A01G405800	NA	correctChromosome	chr1A_564278179	1A	92.5481
chr1A_571788143	chr1A	571788143	TraesCS1A01G410700	NA	correctChromosome	chr1A_564278179	1A	92.5481
chr1A_547966044	chr1A	547966044	TraesCS1A01G370800	NA	correctChromosome	chr1A_564278179	1A	92.5481
chr1A_568546535	chr1A	568546535	TraesCS1A01G405800	NA	correctChromosome	chr1A_564278179	1A	92.5481
chr1A_570140933	chr1A	570140933	TraesCS1A01G407700	NA	correctChromosome	chr1A_564278179	1A	92.5481
chr1A_566011016	chr1A	566011016	TraesCS1A01G402400	NA	correctChromosome	chr1A_564278179	1A	92.5481
chr1A_570140855	chr1A	570140855	TraesCS1A01G407700	NA	correctChromosome	chr1A_564278179	1A	92.5481
chr1A_571281553	chr1A	571281553	TraesCS1A01G409700	NA	correctChromosome	chr1A_564278179	1A	92.5481
chr1A_567974042	chr1A	567974042	TraesCS1A01G404300	NA	correctChromosome	chr1A_564278179	1A	92.5481
chr1A_568543979	chr1A	568543979	TraesCS1A01G405800	NA	correctChromosome	chr1A_564278179	1A	92.5481
chr1A_564305079	chr1A	564305079	TraesCS1A01G400300	NA	correctChromosome	chr1A_564278179	1A	92.5481
chr1A_564750633	chr1A	564750633	TraesCS1A01G401300	NA	correctChromosome	chr1A_564278179	1A	92.5481
chr1A_569468753	chr1A	569468753	TraesCS1A01G407100	NA	correctChromosome	chr1A_564278179	1A	92.5481
chr1A_570140752	chr1A	570140752	TraesCS1A01G407700	NA	correctChromosome	chr1A_564278179	1A	92.5481
chr1A_566011542	chr1A	566011542	TraesCS1A01G402400	NA	correctChromosome	chr1A_564278179	1A	92.5481
chr1A_552167734	chr1A	552167734	TraesCS1A01G381500	NA	correctChromosome	chr1A_572350933	1A	97.0365
chr1A_550613149	chr1A	550613149	TraesCS1A01G376400	NA	correctChromosome	chr1A_572350933	1A	97.0365
chr1A_551983300	chr1A	551983300	TraesCS1A01G381200	NA	correctChromosome	chr1A_572350933	1A	97.0365
chr1A_573332774	chr1A	573332774	TraesCS1A01G413700	NA	correctChromosome	chr1A_572350933	1A	97.0365
chr1A_552167815	chr1A	552167815	TraesCS1A01G381500	NA	correctChromosome	chr1A_572350933	1A	97.0365
chr1A_550613564	chr1A	550613564	TraesCS1A01G376400	NA	correctChromosome	chr1A_572350933	1A	97.0365
chr1A_572020396	chr1A	572020396	TraesCS1A01G411500	NA	correctChromosome	chr1A_572350933	1A	97.0365
chr1A_550345127	chr1A	550345127	TraesCS1A01G375800	NA	correctChromosome	chr1A_572350933	1A	97.0365
chr1A_573333368	chr1A	573333368	TraesCS1A01G413700	NA	correctChromosome	chr1A_572350933	1A	97.0365
chr1A_573068169	chr1A	573068169	TraesCS1A01G412900	NA	correctChromosome	chr1A_572350933	1A	97.0365
chr1A_550446386	chr1A	550446386	TraesCS1A01G376100	NA	correctChromosome	chr1A_572350933	1A	97.0365
chr1A_551053313	chr1A	551053313	TraesCS1A01G378200	NA	correctChromosome	chr1A_572350933	1A	97.0365
chr1A_572350933	chr1A	572350933	TraesCS1A01G411900	NA	correctChromosome	chr1A_572350933	1A	97.0365
chr1A_550611764	chr1A	550611764	TraesCS1A01G376400	NA	correctChromosome	chr1A_572350933	1A	97.0365
chr1A_573068232	chr1A	573068232	TraesCS1A01G412900	NA	correctChromosome	chr1A_572350933	1A	97.0365
chr1A_550443998	chr1A	550443998	TraesCS1A01G376100	NA	correctChromosome	chr1A_572350933	1A	97.0365
chr1A_572350913	chr1A	572350913	TraesCS1A01G411900	NA	correctChromosome	chr1A_572350933	1A	97.0365
chr1A_573060570	chr1A	573060570	TraesCS1A01G412900	NA	correctChromosome	chr1A_572350933	1A	97.0365
chr1A_550441969	chr1A	550441969	TraesCS1A01G376100	NA	correctChromosome	chr1A_572350933	1A	97.0365
chr1A_573060569	chr1A	573060569	TraesCS1A01G412900	NA	correctChromosome	chr1A_572350933	1A	97.0365
chr1A_572212903	chr1A	572212903	TraesCS1A01G411600	NA	correctChromosome	chr1A_572350933	1A	97.0365
chr1A_573233513	chr1A	573233513	TraesCS1A01G413300	NA	correctChromosome	chr1A_572350933	1A	97.0365
chr1A_550615735	chr1A	550615735	TraesCS1A01G376400	NA	correctChromosome	chr1A_572350933	1A	97.0365
chr1A_575741002	chr1A	575741002	TraesCS1A01G418300	NA	correctChromosome	chr1A_575741002	1A	97.6779
chr1A_577841655	chr1A	577841655	TraesCS1A01G422100	NA	correctChromosome	chr1A_577474022	1A	99.7393
chr1A_578911682	chr1A	578911682	TraesCS1A01G423700	NA	correctChromosome	chr1A_577474022	1A	99.7393
chr1A_577474214	chr1A	577474214	TraesCS1A01G421000	NA	correctChromosome	chr1A_577474022	1A	99.7393
chr1A_578911456	chr1A	578911456	TraesCS1A01G423700	NA	correctChromosome	chr1A_577474022	1A	99.7393
chr1A_578519010	chr1A	578519010	TraesCS1A01G423100	NA	correctChromosome	chr1A_577474022	1A	99.7393
chr1A_578911394	chr1A	578911394	TraesCS1A01G423700	NA	correctChromosome	chr1A_577474022	1A	99.7393
chr1A_577473541	chr1A	577473541	TraesCS1A01G421000	NA	correctChromosome	chr1A_577474022	1A	99.7393
chr1A_577474022	chr1A	577474022	TraesCS1A01G421000	NA	correctChromosome	chr1A_577474022	1A	99.7393
chr1A_578521585	chr1A	578521585	TraesCS1A01G423100	NA	correctChromosome	chr1A_577474022	1A	99.7393
chr1A_578940752	chr1A	578940752	TraesCS1A01G424000	NA	correctChromosome	chr1A_577474022	1A	99.7393
chr1A_578940285	chr1A	578940285	TraesCS1A01G424000	NA	correctChromosome	chr1A_577474022	1A	99.7393
chr1A_577474112	chr1A	577474112	TraesCS1A01G421000	NA	correctChromosome	chr1A_577474022	1A	99.7393
chr1A_577468491	chr1A	577468491	TraesCS1A01G421000	NA	correctChromosome	chr1A_577474022	1A	99.7393
chr1A_579298298	chr1A	579298298	TraesCS1A01G424200	NA	correctChromosome	chr1A_579297261	1A	102.321
chr1A_579299339	chr1A	579299339	TraesCS1A01G424200	NA	correctChromosome	chr1A_579297261	1A	102.321
chr1A_579299146	chr1A	579299146	TraesCS1A01G424200	NA	correctChromosome	chr1A_579297261	1A	102.321
chr1A_579297261	chr1A	579297261	TraesCS1A01G424200	NA	correctChromosome	chr1A_579297261	1A	102.321
chr1A_580186768	chr1A	580186768	TraesCS1A01G425100	NA	correctChromosome	chr1A_580186783	1A	102.943
chr1A_580186783	chr1A	580186783	TraesCS1A01G425100	NA	correctChromosome	chr1A_580186783	1A	102.943
chr1A_580187096	chr1A	580187096	TraesCS1A01G425100	NA	correctChromosome	chr1A_580186783	1A	102.943
chr1A_581542533	chr1A	581542533	TraesCS1A01G426900	NA	correctChromosome	chr1A_581437987	1A	103.884
chr1A_581437987	chr1A	581437987	TraesCS1A01G426700	NA	correctChromosome	chr1A_581437987	1A	103.884
chr1A_581543310	chr1A	581543310	TraesCS1A01G426900	NA	correctChromosome	chr1A_581437987	1A	103.884
chr1A_581541930	chr1A	581541930	TraesCS1A01G426900	NA	correctChromosome	chr1A_581437987	1A	103.884
chr1A_582219904	chr1A	582219904	TraesCS1A01G428100	NA	correctChromosome	chr1A_581437987	1A	103.884
chr1A_582420140	chr1A	582420140	TraesCS1A01G428700	NA	correctChromosome	chr1A_582417341	1A	107.091
chr1A_582426312	chr1A	582426312	TraesCS1A01G428700	NA	correctChromosome	chr1A_582417341	1A	107.091
chr1A_582419584	chr1A	582419584	TraesCS1A01G428700	NA	correctChromosome	chr1A_582417341	1A	107.091
chr1A_582418459	chr1A	582418459	TraesCS1A01G428700	NA	correctChromosome	chr1A_582417341	1A	107.091
chr1A_580496510	chr1A	580496510	TraesCS1A01G425700	NA	correctChromosome	chr1A_582417341	1A	107.091
chr1A_582417269	chr1A	582417269	TraesCS1A01G428700	NA	correctChromosome	chr1A_582417341	1A	107.091
chr1A_582417341	chr1A	582417341	TraesCS1A01G428700	NA	correctChromosome	chr1A_582417341	1A	107.091
chr1A_582424446	chr1A	582424446	TraesCS1A01G428700	NA	correctChromosome	chr1A_582417341	1A	107.091
chr1A_583895078	chr1A	583895078	TraesCS1A01G431600	NA	correctChromosome	chr1A_582708402	1A	108.755
chr1A_582867275	chr1A	582867275	TraesCS1A01G430400	NA	correctChromosome	chr1A_582708402	1A	108.755
chr1A_583894984	chr1A	583894984	TraesCS1A01G431600	NA	correctChromosome	chr1A_582708402	1A	108.755
chr1A_582866805	chr1A	582866805	TraesCS1A01G430400	NA	correctChromosome	chr1A_582708402	1A	108.755
chr1A_583659925	chr1A	583659925	TraesCS1A01G431500	NA	correctChromosome	chr1A_582708402	1A	108.755
chr1A_582708402	chr1A	582708402	TraesCS1A01G429400	NA	correctChromosome	chr1A_582708402	1A	108.755
chr1A_583892998	chr1A	583892998	TraesCS1A01G431600	NA	correctChromosome	chr1A_582708402	1A	108.755
chr1A_583604419	chr1A	583604419	TraesCS1A01G431400	NA	correctChromosome	chr1A_582708402	1A	108.755
chr1A_583604404	chr1A	583604404	TraesCS1A01G431400	NA	correctChromosome	chr1A_582708402	1A	108.755
chr1A_582708526	chr1A	582708526	TraesCS1A01G429400	NA	correctChromosome	chr1A_582708402	1A	108.755
chr1A_583893000	chr1A	583893000	TraesCS1A01G431600	NA	correctChromosome	chr1A_582708402	1A	108.755
chr1A_584471801	chr1A	584471801	TraesCS1A01G432900	NA	correctChromosome	chr1A_584469444	1A	109.565
chr1A_584469113	chr1A	584469113	TraesCS1A01G432900	NA	correctChromosome	chr1A_584469444	1A	109.565
chr1A_584469444	chr1A	584469444	TraesCS1A01G432900	NA	correctChromosome	chr1A_584469444	1A	109.565
chr1A_584480352	chr1A	584480352	TraesCS1A01G432900	NA	correctChromosome	chr1A_584469444	1A	109.565
chr1A_584374655	chr1A	584374655	TraesCS1A01G432800	NA	correctChromosome	chr1A_584469444	1A	109.565
chr1A_584374675	chr1A	584374675	TraesCS1A01G432800	NA	correctChromosome	chr1A_584469444	1A	109.565
chr1A_584374207	chr1A	584374207	TraesCS1A01G432800	NA	correctChromosome	chr1A_584469444	1A	109.565
chr1A_585626445	chr1A	585626445	TraesCS1A01G435000	NA	correctChromosome	chr1A_585626445	1A	110.051
chr1A_585626153	chr1A	585626153	TraesCS1A01G435000	NA	correctChromosome	chr1A_585626445	1A	110.051
chr1A_585626065	chr1A	585626065	TraesCS1A01G435000	NA	correctChromosome	chr1A_585626445	1A	110.051
chr1A_585626154	chr1A	585626154	TraesCS1A01G435000	NA	correctChromosome	chr1A_585626445	1A	110.051
chr1A_585626446	chr1A	585626446	TraesCS1A01G435000	NA	correctChromosome	chr1A_585626445	1A	110.051
chr1A_589040653	chr1A	589040653	TraesCS1A01G439700	NA	correctChromosome	chr1A_588767239	1A	114.936
chr1A_588906459	chr1A	588906459	TraesCS1A01G439400	NA	correctChromosome	chr1A_588767239	1A	114.936
chr1A_588767239	chr1A	588767239	TraesCS1A01G439200-TraesCS1A01G439300	NA	correctChromosome	chr1A_588767239	1A	114.936
chr1A_588908316	chr1A	588908316	TraesCS1A01G439400	NA	correctChromosome	chr1A_588767239	1A	114.936
chr1A_589032864	chr1A	589032864	TraesCS1A01G439500	NA	correctChromosome	chr1A_588767239	1A	114.936
chr1A_589022393	chr1A	589022393	TraesCS1A01G439500	NA	correctChromosome	chr1A_588767239	1A	114.936
chr1A_588301001	chr1A	588301001	TraesCS1A01G438600	NA	correctChromosome	chr1A_588767239	1A	114.936
chr1A_589028327	chr1A	589028327	TraesCS1A01G439500	NA	correctChromosome	chr1A_589028327	1A	116.365
chr1A_589023953	chr1A	589023953	TraesCS1A01G439500	NA	correctChromosome	chr1A_589039433	1A	116.703
chr1A_589039433	chr1A	589039433	TraesCS1A01G439600	NA	correctChromosome	chr1A_589039433	1A	116.703
chr1A_589055852	chr1A	589055852	TraesCS1A01G439800	NA	correctChromosome	chr1A_589055852	1A	123.042
chr1A_589056531	chr1A	589056531	TraesCS1A01G439800	NA	correctChromosome	chr1A_589056531	1A	126.704
chr1A_589444044	chr1A	589444044	TraesCS1A01G440200	NA	correctChromosome	chr1A_589444044	1A	126.961
chr1A_590342407	chr1A	590342407	TraesCS1A01G441600	NA	correctChromosome	chr1A_590342407	1A	129.844
chr1A_590344788	chr1A	590344788	TraesCS1A01G441600	NA	correctChromosome	chr1A_590343993	1A	132.853
chr1A_590249757	chr1A	590249757	TraesCS1A01G441500	NA	correctChromosome	chr1A_590343993	1A	132.853
chr1A_590343993	chr1A	590343993	TraesCS1A01G441600	NA	correctChromosome	chr1A_590343993	1A	132.853
chr1A_590346571	chr1A	590346571	TraesCS1A01G441600	NA	correctChromosome	chr1A_590343993	1A	132.853
chr1A_590344536	chr1A	590344536	TraesCS1A01G441600	NA	correctChromosome	chr1A_590343993	1A	132.853
chr1A_590001977	chr1A	590001977	TraesCS1A01G441400	NA	correctChromosome	chr1A_590343993	1A	132.853
chr1A_590342710	chr1A	590342710	TraesCS1A01G441600	NA	correctChromosome	chr1A_590343993	1A	132.853
chr1A_590002741	chr1A	590002741	TraesCS1A01G441400	NA	correctChromosome	chr1A_590343993	1A	132.853
chr1A_589792275	chr1A	589792275	TraesCS1A01G441100	NA	correctChromosome	chr1A_590343993	1A	132.853
chr1A_590249770	chr1A	590249770	TraesCS1A01G441500	NA	correctChromosome	chr1A_590343993	1A	132.853
chr1A_590553104	chr1A	590553104	TraesCS1A01G441800	NA	correctChromosome	chr1A_590553104	1A	134.249
chr1A_591147437	chr1A	591147437	TraesCS1A01G442500	NA	correctChromosome	chr1A_591147704	1A	139.392
chr1A_593548902	chr1A	593548902	TraesCS1A01G445900	NA	correctChromosome	chr1A_591147704	1A	139.392
chr1A_591089444	chr1A	591089444	TraesCS1A01G442400	NA	correctChromosome	chr1A_591147704	1A	139.392
chr1A_591153665	chr1A	591153665	TraesCS1A01G442500	NA	correctChromosome	chr1A_591147704	1A	139.392
chr1A_591148752	chr1A	591148752	TraesCS1A01G442500	NA	correctChromosome	chr1A_591147704	1A	139.392
chr1A_592091230	chr1A	592091230	TraesCS1A01G443900	NA	correctChromosome	chr1A_591147704	1A	139.392
chr1A_590547319	chr1A	590547319	TraesCS1A01G441800	NA	correctChromosome	chr1A_591147704	1A	139.392
chr1A_590549619	chr1A	590549619	TraesCS1A01G441800	NA	correctChromosome	chr1A_591147704	1A	139.392
chr1A_591612119	chr1A	591612119	TraesCS1A01G443200	NA	correctChromosome	chr1A_591147704	1A	139.392
chr1A_591611439	chr1A	591611439	TraesCS1A01G443100	NA	correctChromosome	chr1A_591147704	1A	139.392
chr1A_591954212	chr1A	591954212	TraesCS1A01G443700	NA	correctChromosome	chr1A_591147704	1A	139.392
chr1A_591926072	chr1A	591926072	TraesCS1A01G443400	NA	correctChromosome	chr1A_591147704	1A	139.392
chr1A_591954406	chr1A	591954406	TraesCS1A01G443700	NA	correctChromosome	chr1A_591147704	1A	139.392
chr1A_591089626	chr1A	591089626	TraesCS1A01G442400	NA	correctChromosome	chr1A_591147704	1A	139.392
chr1A_591608236	chr1A	591608236	TraesCS1A01G443100	NA	correctChromosome	chr1A_591147704	1A	139.392
chr1A_590001461	chr1A	590001461	TraesCS1A01G441400	NA	correctChromosome	chr1A_591147704	1A	139.392
chr1A_590995880	chr1A	590995880	TraesCS1A01G442300	NA	correctChromosome	chr1A_591147704	1A	139.392
chr1A_591147704	chr1A	591147704	TraesCS1A01G442500	NA	correctChromosome	chr1A_591147704	1A	139.392
chr1A_591955992	chr1A	591955992	TraesCS1A01G443600	NA	correctChromosome	chr1A_591147704	1A	139.392
chr1A_591613899	chr1A	591613899	TraesCS1A01G443200	NA	correctChromosome	chr1A_591147704	1A	139.392
chr1A_591102120	chr1A	591102120	TraesCS1A01G442400	NA	correctChromosome	chr1A_591147704	1A	139.392
chr1A_591090300	chr1A	591090300	TraesCS1A01G442400	NA	correctChromosome	chr1A_591147704	1A	139.392
chr1A_591096979	chr1A	591096979	TraesCS1A01G442400	NA	correctChromosome	chr1A_591147704	1A	139.392
chr1A_591098822	chr1A	591098822	TraesCS1A01G442400	NA	correctChromosome	chr1A_591147704	1A	139.392
chr1A_591099360	chr1A	591099360	TraesCS1A01G442400	NA	correctChromosome	chr1A_591147704	1A	139.392
chr1A_590672613	chr1A	590672613	TraesCS1A01G441900-TraesCS1A01G442000	NA	correctChromosome	chr1A_591147704	1A	139.392
chr1A_590997356	chr1A	590997356	TraesCS1A01G442300	NA	correctChromosome	chr1A_591147704	1A	139.392
chr1A_590995853	chr1A	590995853	TraesCS1A01G442300	NA	correctChromosome	chr1A_591147704	1A	139.392
chr1A_590549935	chr1A	590549935	TraesCS1A01G441800	NA	correctChromosome	chr1A_591147704	1A	139.392
chr1A_591147633	chr1A	591147633	TraesCS1A01G442500	NA	correctChromosome	chr1A_591147704	1A	139.392
chr1A_591090988	chr1A	591090988	TraesCS1A01G442400	NA	correctChromosome	chr1A_591147704	1A	139.392
chr1A_591089522	chr1A	591089522	TraesCS1A01G442400	NA	correctChromosome	chr1A_591147704	1A	139.392
chr1A_591098187	chr1A	591098187	TraesCS1A01G442400	NA	correctChromosome	chr1A_591147704	1A	139.392
chr1A_591091248	chr1A	591091248	TraesCS1A01G442400	NA	correctChromosome	chr1A_591147704	1A	139.392
chr1A_591098309	chr1A	591098309	TraesCS1A01G442400	NA	correctChromosome	chr1A_591147704	1A	139.392
chr1A_591147502	chr1A	591147502	TraesCS1A01G442500	NA	correctChromosome	chr1A_591147704	1A	139.392
chr1A_591147606	chr1A	591147606	TraesCS1A01G442500	NA	correctChromosome	chr1A_591147704	1A	139.392
chr1A_591147698	chr1A	591147698	TraesCS1A01G442500	NA	correctChromosome	chr1A_591147704	1A	139.392
chr1A_591147481	chr1A	591147481	TraesCS1A01G442500	NA	correctChromosome	chr1A_591147704	1A	139.392
chr1A_590997373	chr1A	590997373	TraesCS1A01G442300	NA	correctChromosome	chr1A_591147704	1A	139.392
chr1A_591095673	chr1A	591095673	TraesCS1A01G442400	NA	correctChromosome	chr1A_591147704	1A	139.392
chr1A_591606187	chr1A	591606187	TraesCS1A01G443100	NA	correctChromosome	chr1A_591606187	1A	130.966
chr1A_593549127	chr1A	593549127	TraesCS1A01G445900	NA	correctChromosome	chr1A_592312062	1A	139.887
chr1A_592311926	chr1A	592311926	TraesCS1A01G444200	NA	correctChromosome	chr1A_592312062	1A	139.887
chr1A_593551933	chr1A	593551933	TraesCS1A01G445900	NA	correctChromosome	chr1A_592312062	1A	139.887
chr1A_593405384	chr1A	593405384	TraesCS1A01G445800	NA	correctChromosome	chr1A_592312062	1A	139.887
chr1A_592312062	chr1A	592312062	TraesCS1A01G444200	NA	correctChromosome	chr1A_592312062	1A	139.887
chr1A_593406315	chr1A	593406315	TraesCS1A01G445800	NA	correctChromosome	chr1A_592312062	1A	139.887
chr1A_593398197	chr1A	593398197	TraesCS1A01G445700	NA	correctChromosome	chr1A_592312062	1A	139.887
chr1A_593399003	chr1A	593399003	TraesCS1A01G445700	NA	correctChromosome	chr1A_592312062	1A	139.887
chr1A_593550685	chr1A	593550685	TraesCS1A01G445900	NA	correctChromosome	chr1A_592312062	1A	139.887
chr1A_593405914	chr1A	593405914	TraesCS1A01G445800	NA	correctChromosome	chr1A_592312062	1A	139.887
chr1A_593551862	chr1A	593551862	TraesCS1A01G445900	NA	correctChromosome	chr1A_592312062	1A	139.887
chr1A_593550991	chr1A	593550991	TraesCS1A01G445900	NA	correctChromosome	chr1A_592312062	1A	139.887
chr1A_593548305	chr1A	593548305	TraesCS1A01G445900	NA	correctChromosome	chr1A_592312062	1A	139.887
chr1A_593550454	chr1A	593550454	TraesCS1A01G445900	NA	correctChromosome	chr1A_592312062	1A	139.887
chr1A_115357763	chr1A	115357763	TraesCS1A01G112700	NA	correctChromosome	chr1A_79168901	1A	26.0397
chr1A_65265658	chr1A	65265658	TraesCS1A01G082100	NA	correctChromosome	chr1A_79168901	1A	26.0397
chr1A_95825627	chr1A	95825627	TraesCS1A01G099300	NA	correctChromosome	chr1A_79168901	1A	26.0397
chr1A_303728625	chr1A	303728625	TraesCS1A01G170000	NA	correctChromosome	chr1A_79168901	1A	26.0397
chr1A_79168901	chr1A	79168901	TraesCS1A01G089800	NA	correctChromosome	chr1A_79168901	1A	26.0397
chr1B_130643087	chr1B	130643087	TraesCS1B01G112700	NA	correctChromosome	chr1B_110604346	1B	21.9734
chr1B_132937505	chr1B	132937505	TraesCS1B01G113400	NA	correctChromosome	chr1B_110604346	1B	21.9734
chr1B_133106929	chr1B	133106929	TraesCS1B01G113800	NA	correctChromosome	chr1B_110604346	1B	21.9734
chr1B_130637668	chr1B	130637668	TraesCS1B01G112700	NA	correctChromosome	chr1B_110604346	1B	21.9734
chr1B_110618449	chr1B	110618449	TraesCS1B01G101000	NA	correctChromosome	chr1B_110604346	1B	21.9734
chr1B_130636914	chr1B	130636914	TraesCS1B01G112700	NA	correctChromosome	chr1B_110604346	1B	21.9734
chr1B_130643816	chr1B	130643816	TraesCS1B01G112700	NA	correctChromosome	chr1B_110604346	1B	21.9734
chr1B_110618500	chr1B	110618500	TraesCS1B01G101000	NA	correctChromosome	chr1B_110604346	1B	21.9734
chr1B_110618550	chr1B	110618550	TraesCS1B01G101000	NA	correctChromosome	chr1B_110604346	1B	21.9734
chr1B_107132688	chr1B	107132688	TraesCS1B01G099600	NA	correctChromosome	chr1B_110604346	1B	21.9734
chr1B_107153271	chr1B	107153271	TraesCS1B01G099800	NA	correctChromosome	chr1B_110604346	1B	21.9734
chr1B_130643350	chr1B	130643350	TraesCS1B01G112700	NA	correctChromosome	chr1B_110604346	1B	21.9734
chr1B_107133322	chr1B	107133322	TraesCS1B01G099600	NA	correctChromosome	chr1B_110604346	1B	21.9734
chr1B_111263870	chr1B	111263870	TraesCS1B01G101600	NA	correctChromosome	chr1B_110604346	1B	21.9734
chr1B_130640825	chr1B	130640825	TraesCS1B01G112700	NA	correctChromosome	chr1B_110604346	1B	21.9734
chr1B_110607549	chr1B	110607549	TraesCS1B01G100800	NA	correctChromosome	chr1B_110604346	1B	21.9734
chr1B_112203593	chr1B	112203593	TraesCS1B01G102200	NA	correctChromosome	chr1B_110604346	1B	21.9734
chr1B_130640870	chr1B	130640870	TraesCS1B01G112700	NA	correctChromosome	chr1B_110604346	1B	21.9734
chr1B_112368672	chr1B	112368672	TraesCS1B01G102300-TraesCS1B01G102400	NA	correctChromosome	chr1B_110604346	1B	21.9734
chr1B_111368363	chr1B	111368363	TraesCS1B01G101700	NA	correctChromosome	chr1B_110604346	1B	21.9734
chr1B_110604346	chr1B	110604346	TraesCS1B01G100800	NA	correctChromosome	chr1B_110604346	1B	21.9734
chr1B_107133305	chr1B	107133305	TraesCS1B01G099600	NA	correctChromosome	chr1B_110604346	1B	21.9734
chr1B_130643399	chr1B	130643399	TraesCS1B01G112700	NA	correctChromosome	chr1B_110604346	1B	21.9734
chr1B_98745441	chr1B	98745441	TraesCS1B01G095200-TraesCS1B01G095300	NA	correctChromosome	chr1B_110604346	1B	21.9734
chr1B_130643081	chr1B	130643081	TraesCS1B01G112700	NA	correctChromosome	chr1B_110604346	1B	21.9734
chr1B_110607725	chr1B	110607725	TraesCS1B01G100800	NA	correctChromosome	chr1B_110604346	1B	21.9734
chr1B_108213469	chr1B	108213469	TraesCS1B01G100200	NA	correctChromosome	chr1B_110604346	1B	21.9734
chr1B_130636888	chr1B	130636888	TraesCS1B01G112700	NA	correctChromosome	chr1B_110604346	1B	21.9734
chr1B_130636819	chr1B	130636819	TraesCS1B01G112700	NA	correctChromosome	chr1B_110604346	1B	21.9734
chr1B_108219024	chr1B	108219024	TraesCS1B01G100200	NA	correctChromosome	chr1B_110604346	1B	21.9734
chr1B_99713360	chr1B	99713360	TraesCS1B01G095800	NA	correctChromosome	chr1B_110604346	1B	21.9734
chr1B_132936301	chr1B	132936301	TraesCS1B01G113400	NA	correctChromosome	chr1B_110604346	1B	21.9734
chr1B_113570297	chr1B	113570297	TraesCS1B01G103800	NA	correctChromosome	chr1B_110604346	1B	21.9734
chr1B_112203158	chr1B	112203158	TraesCS1B01G102200	NA	correctChromosome	chr1B_110604346	1B	21.9734
chr1B_101247493	chr1B	101247493	TraesCS1B01G097000-TraesCS1B01G097100	NA	correctChromosome	chr1B_110604346	1B	21.9734
chr1B_130639921	chr1B	130639921	TraesCS1B01G112700	NA	correctChromosome	chr1B_110604346	1B	21.9734
chr1B_112203625	chr1B	112203625	TraesCS1B01G102200	NA	correctChromosome	chr1B_110604346	1B	21.9734
chr1B_130636971	chr1B	130636971	TraesCS1B01G112700	NA	correctChromosome	chr1B_110604346	1B	21.9734
chr1B_112204756	chr1B	112204756	TraesCS1B01G102200	NA	correctChromosome	chr1B_110604346	1B	21.9734
chr1B_111972246	chr1B	111972246	TraesCS1B01G102000	NA	correctChromosome	chr1B_110604346	1B	21.9734
chr1B_130637632	chr1B	130637632	TraesCS1B01G112700	NA	correctChromosome	chr1B_110604346	1B	21.9734
chr1B_110617154	chr1B	110617154	TraesCS1B01G100900	NA	correctChromosome	chr1B_110617154	1B	22.9846
chr1B_1249159	chr1B	1249159	TraesCS1B01G001000	NA	correctChromosome	chr1B_1249159	1B	2.64811
chr1B_132935315	chr1B	132935315	TraesCS1B01G113400	NA	correctChromosome	chr1B_132935315	1B	21.9734
chr1B_132935316	chr1B	132935316	TraesCS1B01G113400	NA	correctChromosome	chr1B_132935315	1B	21.9734
chr1B_1421208	chr1B	1421208	TraesCS1B01G001600	NA	correctChromosome	chr1B_1421338	1B	5.73358
chr1B_1434435	chr1B	1434435	TraesCS1B01G001800	NA	correctChromosome	chr1B_1421338	1B	5.73358
chr1B_1255216	chr1B	1255216	TraesCS1B01G001000	NA	correctChromosome	chr1B_1421338	1B	5.73358
chr1B_1421338	chr1B	1421338	TraesCS1B01G001600	NA	correctChromosome	chr1B_1421338	1B	5.73358
chr1B_1420351	chr1B	1420351	TraesCS1B01G001600	NA	correctChromosome	chr1B_1421338	1B	5.73358
chr1B_1419786	chr1B	1419786	TraesCS1B01G001600	NA	correctChromosome	chr1B_1421338	1B	5.73358
chr1B_1203913	chr1B	1203913	TraesCS1B01G000800	NA	correctChromosome	chr1B_1421338	1B	5.73358
chr1B_1420397	chr1B	1420397	TraesCS1B01G001600	NA	correctChromosome	chr1B_1421338	1B	5.73358
chr1B_1416345	chr1B	1416345	TraesCS1B01G001500	NA	correctChromosome	chr1B_1421338	1B	5.73358
chr1B_1255210	chr1B	1255210	TraesCS1B01G001000	NA	correctChromosome	chr1B_1421338	1B	5.73358
chr1B_1254498	chr1B	1254498	TraesCS1B01G001000	NA	correctChromosome	chr1B_1421338	1B	5.73358
chr1B_1434354	chr1B	1434354	TraesCS1B01G001800	NA	correctChromosome	chr1B_1430915	1B	0
chr1B_1433814	chr1B	1433814	TraesCS1B01G001800	NA	correctChromosome	chr1B_1430915	1B	0
chr1B_1434255	chr1B	1434255	TraesCS1B01G001800	NA	correctChromosome	chr1B_1430915	1B	0
chr1B_1435998	chr1B	1435998	TraesCS1B01G001800	NA	correctChromosome	chr1B_1430915	1B	0
chr1B_1433574	chr1B	1433574	TraesCS1B01G001800	NA	correctChromosome	chr1B_1430915	1B	0
chr1B_1431937	chr1B	1431937	TraesCS1B01G001800	NA	correctChromosome	chr1B_1430915	1B	0
chr1B_1434060	chr1B	1434060	TraesCS1B01G001800	NA	correctChromosome	chr1B_1430915	1B	0
chr1B_1435889	chr1B	1435889	TraesCS1B01G001800	NA	correctChromosome	chr1B_1430915	1B	0
chr1B_1430915	chr1B	1430915	TraesCS1B01G001800	NA	correctChromosome	chr1B_1430915	1B	0
chr1B_1434147	chr1B	1434147	TraesCS1B01G001800	NA	correctChromosome	chr1B_1430915	1B	0
chr1B_1436278	chr1B	1436278	TraesCS1B01G001800	NA	correctChromosome	chr1B_1430915	1B	0
chr1B_1434090	chr1B	1434090	TraesCS1B01G001800	NA	correctChromosome	chr1B_1430915	1B	0
chr1B_1432514	chr1B	1432514	TraesCS1B01G001800	NA	correctChromosome	chr1B_1430915	1B	0
chr1B_1433571	chr1B	1433571	TraesCS1B01G001800	NA	correctChromosome	chr1B_1430915	1B	0
chr1B_1431192	chr1B	1431192	TraesCS1B01G001800	NA	correctChromosome	chr1B_1430915	1B	0
chr1B_1434300	chr1B	1434300	TraesCS1B01G001800	NA	correctChromosome	chr1B_1430915	1B	0
chr1B_1431949	chr1B	1431949	TraesCS1B01G001800	NA	correctChromosome	chr1B_1430915	1B	0
chr1B_26188009	chr1B	26188009	TraesCS1B01G046300	NA	correctChromosome	chr1B_15175413	1B	14.8825
chr1B_15175413	chr1B	15175413	TraesCS1B01G030800	NA	correctChromosome	chr1B_15175413	1B	14.8825
chr1B_30396458	chr1B	30396458	TraesCS1B01G050200	NA	correctChromosome	chr1B_15175413	1B	14.8825
chr1B_17815857	chr1B	17815857	TraesCS1B01G037900	NA	correctChromosome	chr1B_17815857	1B	8.96724
chr1B_17385456	chr1B	17385456	TraesCS1B01G036500	NA	correctChromosome	chr1B_18385792	1B	12.221
chr1B_18387381	chr1B	18387381	TraesCS1B01G038700	NA	correctChromosome	chr1B_18385792	1B	12.221
chr1B_18387573	chr1B	18387573	TraesCS1B01G038700	NA	correctChromosome	chr1B_18385792	1B	12.221
chr1B_18387513	chr1B	18387513	TraesCS1B01G038700	NA	correctChromosome	chr1B_18385792	1B	12.221
chr1B_20587847	chr1B	20587847	TraesCS1B01G041200	NA	correctChromosome	chr1B_18385792	1B	12.221
chr1B_17386400	chr1B	17386400	TraesCS1B01G036600	NA	correctChromosome	chr1B_18385792	1B	12.221
chr1B_18385805	chr1B	18385805	TraesCS1B01G038700	NA	correctChromosome	chr1B_18385792	1B	12.221
chr1B_15450923	chr1B	15450923	TraesCS1B01G031600	NA	correctChromosome	chr1B_18385792	1B	12.221
chr1B_18387084	chr1B	18387084	TraesCS1B01G038700	NA	correctChromosome	chr1B_18385792	1B	12.221
chr1B_17691832	chr1B	17691832	TraesCS1B01G037000-TraesCS1B01G037100	NA	correctChromosome	chr1B_18385792	1B	12.221
chr1B_20587828	chr1B	20587828	TraesCS1B01G041200	NA	correctChromosome	chr1B_18385792	1B	12.221
chr1B_17691874	chr1B	17691874	TraesCS1B01G037000-TraesCS1B01G037100	NA	correctChromosome	chr1B_18385792	1B	12.221
chr1B_30396320	chr1B	30396320	TraesCS1B01G050200	NA	correctChromosome	chr1B_18385792	1B	12.221
chr1B_10067737	chr1B	10067737	TraesCS1B01G022300	NA	correctChromosome	chr1B_18385792	1B	12.221
chr1B_18386160	chr1B	18386160	TraesCS1B01G038700	NA	correctChromosome	chr1B_18385792	1B	12.221
chr1B_18387210	chr1B	18387210	TraesCS1B01G038700	NA	correctChromosome	chr1B_18385792	1B	12.221
chr1B_24151217	chr1B	24151217	TraesCS1B01G044100	NA	correctChromosome	chr1B_18385792	1B	12.221
chr1B_15290689	chr1B	15290689	TraesCS1B01G031000	NA	correctChromosome	chr1B_18385792	1B	12.221
chr1B_18386163	chr1B	18386163	TraesCS1B01G038700	NA	correctChromosome	chr1B_18385792	1B	12.221
chr1B_20587889	chr1B	20587889	TraesCS1B01G041200	NA	correctChromosome	chr1B_18385792	1B	12.221
chr1B_18387234	chr1B	18387234	TraesCS1B01G038700	NA	correctChromosome	chr1B_18385792	1B	12.221
chr1B_18387435	chr1B	18387435	TraesCS1B01G038700	NA	correctChromosome	chr1B_18385792	1B	12.221
chr1B_24150559	chr1B	24150559	TraesCS1B01G044100	NA	correctChromosome	chr1B_18385792	1B	12.221
chr1B_9597839	chr1B	9597839	TraesCS1B01G020600	NA	correctChromosome	chr1B_18385792	1B	12.221
chr1B_24150907	chr1B	24150907	TraesCS1B01G044100	NA	correctChromosome	chr1B_18385792	1B	12.221
chr1B_18385956	chr1B	18385956	TraesCS1B01G038700	NA	correctChromosome	chr1B_18385792	1B	12.221
chr1B_17386434	chr1B	17386434	TraesCS1B01G036600	NA	correctChromosome	chr1B_18385792	1B	12.221
chr1B_24150592	chr1B	24150592	TraesCS1B01G044100	NA	correctChromosome	chr1B_18385792	1B	12.221
chr1B_18386031	chr1B	18386031	TraesCS1B01G038700	NA	correctChromosome	chr1B_18385792	1B	12.221
chr1B_18387297	chr1B	18387297	TraesCS1B01G038700	NA	correctChromosome	chr1B_18385792	1B	12.221
chr1B_17691112	chr1B	17691112	TraesCS1B01G037000-TraesCS1B01G037100	NA	correctChromosome	chr1B_18385792	1B	12.221
chr1B_15280964	chr1B	15280964	TraesCS1B01G030900-TraesCS1B01G031000	NA	correctChromosome	chr1B_18385792	1B	12.221
chr1B_17382144	chr1B	17382144	TraesCS1B01G036500	NA	correctChromosome	chr1B_18385792	1B	12.221
chr1B_17731064	chr1B	17731064	TraesCS1B01G037100	NA	correctChromosome	chr1B_18385792	1B	12.221
chr1B_20587853	chr1B	20587853	TraesCS1B01G041200	NA	correctChromosome	chr1B_18385792	1B	12.221
chr1B_10067844	chr1B	10067844	TraesCS1B01G022300	NA	correctChromosome	chr1B_18385792	1B	12.221
chr1B_24151642	chr1B	24151642	TraesCS1B01G044100	NA	correctChromosome	chr1B_18385792	1B	12.221
chr1B_18387755	chr1B	18387755	TraesCS1B01G038700	NA	correctChromosome	chr1B_18385792	1B	12.221
chr1B_18387264	chr1B	18387264	TraesCS1B01G038700	NA	correctChromosome	chr1B_18385792	1B	12.221
chr1B_9838970	chr1B	9838970	TraesCS1B01G021300	NA	correctChromosome	chr1B_18385792	1B	12.221
chr1B_9597558	chr1B	9597558	TraesCS1B01G020600	NA	correctChromosome	chr1B_18385792	1B	12.221
chr1B_17792883	chr1B	17792883	TraesCS1B01G037600	NA	correctChromosome	chr1B_18385792	1B	12.221
chr1B_10204569	chr1B	10204569	TraesCS1B01G022900	NA	correctChromosome	chr1B_18385792	1B	12.221
chr1B_15288352	chr1B	15288352	TraesCS1B01G031000	NA	correctChromosome	chr1B_18385792	1B	12.221
chr1B_20587689	chr1B	20587689	TraesCS1B01G041200	NA	correctChromosome	chr1B_18385792	1B	12.221
chr1B_24152293	chr1B	24152293	TraesCS1B01G044100	NA	correctChromosome	chr1B_18385792	1B	12.221
chr1B_24152052	chr1B	24152052	TraesCS1B01G044100	NA	correctChromosome	chr1B_18385792	1B	12.221
chr1B_20587475	chr1B	20587475	TraesCS1B01G041200	NA	correctChromosome	chr1B_18385792	1B	12.221
chr1B_17891183	chr1B	17891183	TraesCS1B01G038100	NA	correctChromosome	chr1B_18385792	1B	12.221
chr1B_18387772	chr1B	18387772	TraesCS1B01G038700	NA	correctChromosome	chr1B_18385792	1B	12.221
chr1B_18387390	chr1B	18387390	TraesCS1B01G038700	NA	correctChromosome	chr1B_18385792	1B	12.221
chr1B_9599454	chr1B	9599454	TraesCS1B01G020600	NA	correctChromosome	chr1B_18385792	1B	12.221
chr1B_15440019	chr1B	15440019	TraesCS1B01G031500	NA	correctChromosome	chr1B_18385792	1B	12.221
chr1B_15280955	chr1B	15280955	TraesCS1B01G030900-TraesCS1B01G031000	NA	correctChromosome	chr1B_18385792	1B	12.221
chr1B_9597391	chr1B	9597391	TraesCS1B01G020600	NA	correctChromosome	chr1B_18385792	1B	12.221
chr1B_14845499	chr1B	14845499	TraesCS1B01G030000	NA	correctChromosome	chr1B_18385792	1B	12.221
chr1B_17731157	chr1B	17731157	TraesCS1B01G037100	NA	correctChromosome	chr1B_18385792	1B	12.221
chr1B_9597318	chr1B	9597318	TraesCS1B01G020600	NA	correctChromosome	chr1B_18385792	1B	12.221
chr1B_18386118	chr1B	18386118	TraesCS1B01G038700	NA	correctChromosome	chr1B_18385792	1B	12.221
chr1B_18385923	chr1B	18385923	TraesCS1B01G038700	NA	correctChromosome	chr1B_18385792	1B	12.221
chr1B_23981792	chr1B	23981792	TraesCS1B01G044000	NA	correctChromosome	chr1B_18385792	1B	12.221
chr1B_24152226	chr1B	24152226	TraesCS1B01G044100	NA	correctChromosome	chr1B_18385792	1B	12.221
chr1B_18387285	chr1B	18387285	TraesCS1B01G038700	NA	correctChromosome	chr1B_18385792	1B	12.221
chr1B_18387382	chr1B	18387382	TraesCS1B01G038700	NA	correctChromosome	chr1B_18385792	1B	12.221
chr1B_9844304	chr1B	9844304	TraesCS1B01G021400	NA	correctChromosome	chr1B_18385792	1B	12.221
chr1B_20585684	chr1B	20585684	TraesCS1B01G041200	NA	correctChromosome	chr1B_18385792	1B	12.221
chr1B_14845460	chr1B	14845460	TraesCS1B01G030000	NA	correctChromosome	chr1B_18385792	1B	12.221
chr1B_20835248	chr1B	20835248	TraesCS1B01G041400	NA	correctChromosome	chr1B_18385792	1B	12.221
chr1B_20835746	chr1B	20835746	TraesCS1B01G041400	NA	correctChromosome	chr1B_18385792	1B	12.221
chr1B_18386674	chr1B	18386674	TraesCS1B01G038700	NA	correctChromosome	chr1B_18385792	1B	12.221
chr1B_15167409	chr1B	15167409	TraesCS1B01G030800	NA	correctChromosome	chr1B_18385792	1B	12.221
chr1B_9597436	chr1B	9597436	TraesCS1B01G020600	NA	correctChromosome	chr1B_18385792	1B	12.221
chr1B_18385974	chr1B	18385974	TraesCS1B01G038700	NA	correctChromosome	chr1B_18385792	1B	12.221
chr1B_18387033	chr1B	18387033	TraesCS1B01G038700	NA	correctChromosome	chr1B_18385792	1B	12.221
chr1B_17892357	chr1B	17892357	TraesCS1B01G038100	NA	correctChromosome	chr1B_18385792	1B	12.221
chr1B_9599594	chr1B	9599594	TraesCS1B01G020700	NA	correctChromosome	chr1B_18385792	1B	12.221
chr1B_17891228	chr1B	17891228	TraesCS1B01G038100	NA	correctChromosome	chr1B_18385792	1B	12.221
chr1B_17891222	chr1B	17891222	TraesCS1B01G038100	NA	correctChromosome	chr1B_18385792	1B	12.221
chr1B_9597491	chr1B	9597491	TraesCS1B01G020600	NA	correctChromosome	chr1B_18385792	1B	12.221
chr1B_20835614	chr1B	20835614	TraesCS1B01G041400	NA	correctChromosome	chr1B_18385792	1B	12.221
chr1B_17891129	chr1B	17891129	TraesCS1B01G038100	NA	correctChromosome	chr1B_18385792	1B	12.221
chr1B_17891130	chr1B	17891130	TraesCS1B01G038100	NA	correctChromosome	chr1B_18385792	1B	12.221
chr1B_17811205	chr1B	17811205	TraesCS1B01G037900	NA	correctChromosome	chr1B_18385792	1B	12.221
chr1B_17815829	chr1B	17815829	TraesCS1B01G037900	NA	correctChromosome	chr1B_18385792	1B	12.221
chr1B_10113678	chr1B	10113678	TraesCS1B01G022800	NA	correctChromosome	chr1B_18385792	1B	12.221
chr1B_17731181	chr1B	17731181	TraesCS1B01G037100	NA	correctChromosome	chr1B_18385792	1B	12.221
chr1B_18386387	chr1B	18386387	TraesCS1B01G038700	NA	correctChromosome	chr1B_18385792	1B	12.221
chr1B_18386733	chr1B	18386733	TraesCS1B01G038700	NA	correctChromosome	chr1B_18385792	1B	12.221
chr1B_17892386	chr1B	17892386	TraesCS1B01G038100	NA	correctChromosome	chr1B_18385792	1B	12.221
chr1B_18385792	chr1B	18385792	TraesCS1B01G038700	NA	correctChromosome	chr1B_18385792	1B	12.221
chr1B_20589239	chr1B	20589239	TraesCS1B01G041200	NA	correctChromosome	chr1B_18385792	1B	12.221
chr1B_20836484	chr1B	20836484	TraesCS1B01G041400	NA	correctChromosome	chr1B_18385792	1B	12.221
chr1B_10067679	chr1B	10067679	TraesCS1B01G022300	NA	correctChromosome	chr1B_18385792	1B	12.221
chr1B_17792933	chr1B	17792933	TraesCS1B01G037700	NA	correctChromosome	chr1B_18385792	1B	12.221
chr1B_15169636	chr1B	15169636	TraesCS1B01G030800	NA	correctChromosome	chr1B_18385792	1B	12.221
chr1B_20591312	chr1B	20591312	TraesCS1B01G041300	NA	correctChromosome	chr1B_18385792	1B	12.221
chr1B_15167583	chr1B	15167583	TraesCS1B01G030800	NA	correctChromosome	chr1B_18385792	1B	12.221
chr1B_15168213	chr1B	15168213	TraesCS1B01G030800	NA	correctChromosome	chr1B_18385792	1B	12.221
chr1B_9597376	chr1B	9597376	TraesCS1B01G020600	NA	correctChromosome	chr1B_18385792	1B	12.221
chr1B_18386423	chr1B	18386423	TraesCS1B01G038700	NA	correctChromosome	chr1B_18385792	1B	12.221
chr1B_9597721	chr1B	9597721	TraesCS1B01G020600	NA	correctChromosome	chr1B_18385792	1B	12.221
chr1B_18386830	chr1B	18386830	TraesCS1B01G038700	NA	correctChromosome	chr1B_18385792	1B	12.221
chr1B_20588255	chr1B	20588255	TraesCS1B01G041200	NA	correctChromosome	chr1B_18385792	1B	12.221
chr1B_9597269	chr1B	9597269	TraesCS1B01G020700	NA	correctChromosome	chr1B_18385792	1B	12.221
chr1B_30396315	chr1B	30396315	TraesCS1B01G050200	NA	correctChromosome	chr1B_18385792	1B	12.221
chr1B_17811201	chr1B	17811201	TraesCS1B01G037900	NA	correctChromosome	chr1B_18385792	1B	12.221
chr1B_20587942	chr1B	20587942	TraesCS1B01G041200	NA	correctChromosome	chr1B_18385792	1B	12.221
chr1B_20592383	chr1B	20592383	TraesCS1B01G041300	NA	correctChromosome	chr1B_18385792	1B	12.221
chr1B_15170932	chr1B	15170932	TraesCS1B01G030800	NA	correctChromosome	chr1B_18385792	1B	12.221
chr1B_17730530	chr1B	17730530	TraesCS1B01G037100	NA	correctChromosome	chr1B_18385792	1B	12.221
chr1B_18386740	chr1B	18386740	TraesCS1B01G038700	NA	correctChromosome	chr1B_18385792	1B	12.221
chr1B_17691920	chr1B	17691920	TraesCS1B01G037000-TraesCS1B01G037100	NA	correctChromosome	chr1B_18385792	1B	12.221
chr1B_20588234	chr1B	20588234	TraesCS1B01G041200	NA	correctChromosome	chr1B_18385792	1B	12.221
chr1B_20836364	chr1B	20836364	TraesCS1B01G041400	NA	correctChromosome	chr1B_18385792	1B	12.221
chr1B_18386687	chr1B	18386687	TraesCS1B01G038700	NA	correctChromosome	chr1B_18385792	1B	12.221
chr1B_18386874	chr1B	18386874	TraesCS1B01G038700	NA	correctChromosome	chr1B_18385792	1B	12.221
chr1B_9597299	chr1B	9597299	TraesCS1B01G020600	NA	correctChromosome	chr1B_18385792	1B	12.221
chr1B_18387039	chr1B	18387039	TraesCS1B01G038700	NA	correctChromosome	chr1B_18385792	1B	12.221
chr1B_18386433	chr1B	18386433	TraesCS1B01G038700	NA	correctChromosome	chr1B_18385792	1B	12.221
chr1B_20589333	chr1B	20589333	TraesCS1B01G041200	NA	correctChromosome	chr1B_18385792	1B	12.221
chr1B_15171054	chr1B	15171054	TraesCS1B01G030800	NA	correctChromosome	chr1B_18385792	1B	12.221
chr1B_18386870	chr1B	18386870	TraesCS1B01G038700	NA	correctChromosome	chr1B_18385792	1B	12.221
chr1B_20588113	chr1B	20588113	TraesCS1B01G041200	NA	correctChromosome	chr1B_18385792	1B	12.221
chr1B_18386997	chr1B	18386997	TraesCS1B01G038700	NA	correctChromosome	chr1B_18385792	1B	12.221
chr1B_17732505	chr1B	17732505	TraesCS1B01G037100	NA	correctChromosome	chr1B_18385792	1B	12.221
chr1B_18386720	chr1B	18386720	TraesCS1B01G038700	NA	correctChromosome	chr1B_18385792	1B	12.221
chr1B_15176029	chr1B	15176029	TraesCS1B01G030800	NA	correctChromosome	chr1B_18385792	1B	12.221
chr1B_18386823	chr1B	18386823	TraesCS1B01G038700	NA	correctChromosome	chr1B_18385792	1B	12.221
chr1B_20587997	chr1B	20587997	TraesCS1B01G041200	NA	correctChromosome	chr1B_20587997	1B	13.1762
chr1B_292346576	chr1B	292346576	TraesCS1B01G166300	NA	correctChromosome	chr1B_288959774	1B	23.9954
chr1B_280167291	chr1B	280167291	TraesCS1B01G162300	NA	correctChromosome	chr1B_288959774	1B	23.9954
chr1B_292346577	chr1B	292346577	TraesCS1B01G166300	NA	correctChromosome	chr1B_288959774	1B	23.9954
chr1B_292341896	chr1B	292341896	TraesCS1B01G166300	NA	correctChromosome	chr1B_288959774	1B	23.9954
chr1B_290814124	chr1B	290814124	TraesCS1B01G166200-TraesCS1B01G166300	NA	correctChromosome	chr1B_288959774	1B	23.9954
chr1B_234251893	chr1B	234251893	TraesCS1B01G150900	NA	correctChromosome	chr1B_288959774	1B	23.9954
chr1B_290814000	chr1B	290814000	TraesCS1B01G166200-TraesCS1B01G166300	NA	correctChromosome	chr1B_288959774	1B	23.9954
chr1B_289078356	chr1B	289078356	TraesCS1B01G165900	NA	correctChromosome	chr1B_288959774	1B	23.9954
chr1B_250426540	chr1B	250426540	TraesCS1B01G153400	NA	correctChromosome	chr1B_288959774	1B	23.9954
chr1B_288807664	chr1B	288807664	TraesCS1B01G165500	NA	correctChromosome	chr1B_288959774	1B	23.9954
chr1B_289081047	chr1B	289081047	TraesCS1B01G165900	NA	correctChromosome	chr1B_288959774	1B	23.9954
chr1B_152524487	chr1B	152524487	TraesCS1B01G125400	NA	correctChromosome	chr1B_288959774	1B	23.9954
chr1B_154168330	chr1B	154168330	TraesCS1B01G126300	NA	correctChromosome	chr1B_288959774	1B	23.9954
chr1B_139282230	chr1B	139282230	TraesCS1B01G118500-TraesCS1B01G118600	NA	correctChromosome	chr1B_288959774	1B	23.9954
chr1B_178098032	chr1B	178098032	TraesCS1B01G138200	NA	correctChromosome	chr1B_288959774	1B	23.9954
chr1B_137453075	chr1B	137453075	TraesCS1B01G117300	NA	correctChromosome	chr1B_288959774	1B	23.9954
chr1B_288810044	chr1B	288810044	TraesCS1B01G165600	NA	correctChromosome	chr1B_288959774	1B	23.9954
chr1B_290814072	chr1B	290814072	TraesCS1B01G166200-TraesCS1B01G166300	NA	correctChromosome	chr1B_288959774	1B	23.9954
chr1B_289524646	chr1B	289524646	TraesCS1B01G166100	NA	correctChromosome	chr1B_288959774	1B	23.9954
chr1B_280167290	chr1B	280167290	TraesCS1B01G162300	NA	correctChromosome	chr1B_288959774	1B	23.9954
chr1B_288959774	chr1B	288959774	TraesCS1B01G165800	NA	correctChromosome	chr1B_288959774	1B	23.9954
chr1B_292347970	chr1B	292347970	TraesCS1B01G166300	NA	correctChromosome	chr1B_288959774	1B	23.9954
chr1B_292350102	chr1B	292350102	TraesCS1B01G166400	NA	correctChromosome	chr1B_288959774	1B	23.9954
chr1B_288395926	chr1B	288395926	TraesCS1B01G165100	NA	correctChromosome	chr1B_288959774	1B	23.9954
chr1B_212427543	chr1B	212427543	TraesCS1B01G147400-TraesCS1B01G147500	NA	correctChromosome	chr1B_288959774	1B	23.9954
chr1B_199007587	chr1B	199007587	TraesCS1B01G145400-TraesCS1B01G145500	NA	correctChromosome	chr1B_288959774	1B	23.9954
chr1B_263270188	chr1B	263270188	TraesCS1B01G155600	NA	correctChromosome	chr1B_288959774	1B	23.9954
chr1B_290817572	chr1B	290817572	TraesCS1B01G166200-TraesCS1B01G166300	NA	correctChromosome	chr1B_288959774	1B	23.9954
chr1B_154594698	chr1B	154594698	TraesCS1B01G126500	NA	correctChromosome	chr1B_288959774	1B	23.9954
chr1B_290813940	chr1B	290813940	TraesCS1B01G166200-TraesCS1B01G166300	NA	correctChromosome	chr1B_288959774	1B	23.9954
chr1B_157278120	chr1B	157278120	TraesCS1B01G128200	NA	correctChromosome	chr1B_288959774	1B	23.9954
chr1B_295091968	chr1B	295091968	TraesCS1B01G166800-TraesCS1B01G166900	NA	correctChromosome	chr1B_288959774	1B	23.9954
chr1B_142834501	chr1B	142834501	TraesCS1B01G120800-TraesCS1B01G120900	NA	correctChromosome	chr1B_288959774	1B	23.9954
chr1B_26187985	chr1B	26187985	TraesCS1B01G046300	NA	correctChromosome	chr1B_30730721	1B	15.2787
chr1B_26187987	chr1B	26187987	TraesCS1B01G046300	NA	correctChromosome	chr1B_30730721	1B	15.2787
chr1B_26185709	chr1B	26185709	TraesCS1B01G046300	NA	correctChromosome	chr1B_30730721	1B	15.2787
chr1B_30396276	chr1B	30396276	TraesCS1B01G050200	NA	correctChromosome	chr1B_30730721	1B	15.2787
chr1B_26188929	chr1B	26188929	TraesCS1B01G046300	NA	correctChromosome	chr1B_30730721	1B	15.2787
chr1B_26185706	chr1B	26185706	TraesCS1B01G046300	NA	correctChromosome	chr1B_30730721	1B	15.2787
chr1B_30730630	chr1B	30730630	TraesCS1B01G050600	NA	correctChromosome	chr1B_30730721	1B	15.2787
chr1B_30731594	chr1B	30731594	TraesCS1B01G050600	NA	correctChromosome	chr1B_30730721	1B	15.2787
chr1B_26188033	chr1B	26188033	TraesCS1B01G046300	NA	correctChromosome	chr1B_30730721	1B	15.2787
chr1B_25812590	chr1B	25812590	TraesCS1B01G045600	NA	correctChromosome	chr1B_30730721	1B	15.2787
chr1B_30730355	chr1B	30730355	TraesCS1B01G050600	NA	correctChromosome	chr1B_30730721	1B	15.2787
chr1B_30731603	chr1B	30731603	TraesCS1B01G050600	NA	correctChromosome	chr1B_30730721	1B	15.2787
chr1B_30731546	chr1B	30731546	TraesCS1B01G050600	NA	correctChromosome	chr1B_30730721	1B	15.2787
chr1B_30731583	chr1B	30731583	TraesCS1B01G050600	NA	correctChromosome	chr1B_30730721	1B	15.2787
chr1B_26188932	chr1B	26188932	TraesCS1B01G046300	NA	correctChromosome	chr1B_30730721	1B	15.2787
chr1B_30730796	chr1B	30730796	TraesCS1B01G050600	NA	correctChromosome	chr1B_30730721	1B	15.2787
chr1B_30730997	chr1B	30730997	TraesCS1B01G050600	NA	correctChromosome	chr1B_30730721	1B	15.2787
chr1B_30730721	chr1B	30730721	TraesCS1B01G050600	NA	correctChromosome	chr1B_30730721	1B	15.2787
chr1B_30731575	chr1B	30731575	TraesCS1B01G050600	NA	correctChromosome	chr1B_30730721	1B	15.2787
chr1B_30396479	chr1B	30396479	TraesCS1B01G050200	NA	correctChromosome	chr1B_30730721	1B	15.2787
chr1B_328823041	chr1B	328823041	TraesCS1B01G181800	NA	correctChromosome	chr1B_324340409	1B	25.3561
chr1B_324340409	chr1B	324340409	TraesCS1B01G178900	NA	correctChromosome	chr1B_324340409	1B	25.3561
chr1B_329376474	chr1B	329376474	TraesCS1B01G182400	NA	correctChromosome	chr1B_330499061	1B	27.8291
chr1B_329377173	chr1B	329377173	TraesCS1B01G182400	NA	correctChromosome	chr1B_330499061	1B	27.8291
chr1B_329478160	chr1B	329478160	TraesCS1B01G182500	NA	correctChromosome	chr1B_330499061	1B	27.8291
chr1B_328642510	chr1B	328642510	TraesCS1B01G181600	NA	correctChromosome	chr1B_330499061	1B	27.8291
chr1B_328939284	chr1B	328939284	TraesCS1B01G182000	NA	correctChromosome	chr1B_330499061	1B	27.8291
chr1B_324781043	chr1B	324781043	TraesCS1B01G179100	NA	correctChromosome	chr1B_330499061	1B	27.8291
chr1B_328820882	chr1B	328820882	TraesCS1B01G181800	NA	correctChromosome	chr1B_330499061	1B	27.8291
chr1B_300950024	chr1B	300950024	TraesCS1B01G169600	NA	correctChromosome	chr1B_330499061	1B	27.8291
chr1B_328824651	chr1B	328824651	TraesCS1B01G181800	NA	correctChromosome	chr1B_330499061	1B	27.8291
chr1B_328942636	chr1B	328942636	TraesCS1B01G182000	NA	correctChromosome	chr1B_330499061	1B	27.8291
chr1B_327575335	chr1B	327575335	TraesCS1B01G181000	NA	correctChromosome	chr1B_330499061	1B	27.8291
chr1B_328942832	chr1B	328942832	TraesCS1B01G182000	NA	correctChromosome	chr1B_330499061	1B	27.8291
chr1B_329376828	chr1B	329376828	TraesCS1B01G182400	NA	correctChromosome	chr1B_330499061	1B	27.8291
chr1B_329376960	chr1B	329376960	TraesCS1B01G182400	NA	correctChromosome	chr1B_330499061	1B	27.8291
chr1B_329486225	chr1B	329486225	TraesCS1B01G182500	NA	correctChromosome	chr1B_330499061	1B	27.8291
chr1B_328645331	chr1B	328645331	TraesCS1B01G181600	NA	correctChromosome	chr1B_330499061	1B	27.8291
chr1B_328821079	chr1B	328821079	TraesCS1B01G181800	NA	correctChromosome	chr1B_330499061	1B	27.8291
chr1B_327483469	chr1B	327483469	TraesCS1B01G180900	NA	correctChromosome	chr1B_330499061	1B	27.8291
chr1B_327478883	chr1B	327478883	TraesCS1B01G180900	NA	correctChromosome	chr1B_330499061	1B	27.8291
chr1B_327482997	chr1B	327482997	TraesCS1B01G180900	NA	correctChromosome	chr1B_330499061	1B	27.8291
chr1B_328642115	chr1B	328642115	TraesCS1B01G181600	NA	correctChromosome	chr1B_330499061	1B	27.8291
chr1B_328939638	chr1B	328939638	TraesCS1B01G182000	NA	correctChromosome	chr1B_330499061	1B	27.8291
chr1B_328643536	chr1B	328643536	TraesCS1B01G181600	NA	correctChromosome	chr1B_330499061	1B	27.8291
chr1B_327483314	chr1B	327483314	TraesCS1B01G180900	NA	correctChromosome	chr1B_330499061	1B	27.8291
chr1B_327842672	chr1B	327842672	TraesCS1B01G181200	NA	correctChromosome	chr1B_330499061	1B	27.8291
chr1B_327576597	chr1B	327576597	TraesCS1B01G181000	NA	correctChromosome	chr1B_330499061	1B	27.8291
chr1B_328821070	chr1B	328821070	TraesCS1B01G181800	NA	correctChromosome	chr1B_330499061	1B	27.8291
chr1B_328642344	chr1B	328642344	TraesCS1B01G181600	NA	correctChromosome	chr1B_330499061	1B	27.8291
chr1B_329379639	chr1B	329379639	TraesCS1B01G182400	NA	correctChromosome	chr1B_330499061	1B	27.8291
chr1B_330499061	chr1B	330499061	TraesCS1B01G183600	NA	correctChromosome	chr1B_330499061	1B	27.8291
chr1B_328642464	chr1B	328642464	TraesCS1B01G181600	NA	correctChromosome	chr1B_330499061	1B	27.8291
chr1B_297863850	chr1B	297863850	TraesCS1B01G168300-TraesCS1B01G168400	NA	correctChromosome	chr1B_330499061	1B	27.8291
chr1B_327842564	chr1B	327842564	TraesCS1B01G181200	NA	correctChromosome	chr1B_330499061	1B	27.8291
chr1B_302759150	chr1B	302759150	TraesCS1B01G170600	NA	correctChromosome	chr1B_330499061	1B	27.8291
chr1B_328939472	chr1B	328939472	TraesCS1B01G182000	NA	correctChromosome	chr1B_330499061	1B	27.8291
chr1B_328942797	chr1B	328942797	TraesCS1B01G182000	NA	correctChromosome	chr1B_330499061	1B	27.8291
chr1B_328939664	chr1B	328939664	TraesCS1B01G182000	NA	correctChromosome	chr1B_330499061	1B	27.8291
chr1B_327479863	chr1B	327479863	TraesCS1B01G180900	NA	correctChromosome	chr1B_330499061	1B	27.8291
chr1B_330625816	chr1B	330625816	TraesCS1B01G184000	NA	correctChromosome	chr1B_330499061	1B	27.8291
chr1B_329485542	chr1B	329485542	TraesCS1B01G182500	NA	correctChromosome	chr1B_330499061	1B	27.8291
chr1B_329486674	chr1B	329486674	TraesCS1B01G182500	NA	correctChromosome	chr1B_330499061	1B	27.8291
chr1B_334315319	chr1B	334315319	TraesCS1B01G187100	NA	correctChromosome	chr1B_334315319	1B	32.9794
chr1B_356871631	chr1B	356871631	TraesCS1B01G198700	NA	correctChromosome	chr1B_356871631	1B	36.1529
chr1B_374012426	chr1B	374012426	TraesCS1B01G206800	NA	correctChromosome	chr1B_356871631	1B	36.1529
chr1B_385214634	chr1B	385214634	TraesCS1B01G211900	NA	correctChromosome	chr1B_385214634	1B	39.4548
chr1B_385214635	chr1B	385214635	TraesCS1B01G211900	NA	correctChromosome	chr1B_385214634	1B	39.4548
chr1B_392149842	chr1B	392149842	TraesCS1B01G216400	NA	correctChromosome	chr1B_392149842	1B	46.7682
chr1B_408658152	chr1B	408658152	TraesCS1B01G227400	NA	correctChromosome	chr1B_392149842	1B	46.7682
chr1B_408656937	chr1B	408656937	TraesCS1B01G227400	NA	correctChromosome	chr1B_392149842	1B	46.7682
chr1B_39389259	chr1B	39389259	TraesCS1B01G056400	NA	correctChromosome	chr1B_39389259	1B	16.6946
chr1B_408641369	chr1B	408641369	TraesCS1B01G227300-TraesCS1B01G227400	NA	correctChromosome	chr1B_407544263	1B	45.4835
chr1B_407293659	chr1B	407293659	TraesCS1B01G226400	NA	correctChromosome	chr1B_407544263	1B	45.4835
chr1B_408637261	chr1B	408637261	TraesCS1B01G227300-TraesCS1B01G227400	NA	correctChromosome	chr1B_407544263	1B	45.4835
chr1B_407772321	chr1B	407772321	TraesCS1B01G227100	NA	correctChromosome	chr1B_407544263	1B	45.4835
chr1B_406350825	chr1B	406350825	TraesCS1B01G226300	NA	correctChromosome	chr1B_407544263	1B	45.4835
chr1B_406342128	chr1B	406342128	TraesCS1B01G226300	NA	correctChromosome	chr1B_407544263	1B	45.4835
chr1B_408638789	chr1B	408638789	TraesCS1B01G227300-TraesCS1B01G227400	NA	correctChromosome	chr1B_407544263	1B	45.4835
chr7B_75904290	chr7B	75904290	TraesCS7B01G070100-TraesCS7B01G070200	NA	wrongChromosome	chr1B_407544263	1B	45.4835
chr1B_407544263	chr1B	407544263	TraesCS1B01G226800	NA	correctChromosome	chr1B_407544263	1B	45.4835
chr1B_409628045	chr1B	409628045	TraesCS1B01G228100	NA	correctChromosome	chr1B_407544263	1B	45.4835
chr1B_16767201	chr1B	16767201	TraesCS1B01G035200	NA	correctChromosome	chr1B_407544263	1B	45.4835
chr1B_408641337	chr1B	408641337	TraesCS1B01G227300-TraesCS1B01G227400	NA	correctChromosome	chr1B_407544263	1B	45.4835
chr1B_407773109	chr1B	407773109	TraesCS1B01G227100	NA	correctChromosome	chr1B_407544263	1B	45.4835
chr1B_406340246	chr1B	406340246	TraesCS1B01G226300	NA	correctChromosome	chr1B_407544263	1B	45.4835
chr1B_406346887	chr1B	406346887	TraesCS1B01G226300	NA	correctChromosome	chr1B_407544263	1B	45.4835
chr1B_407294108	chr1B	407294108	TraesCS1B01G226400	NA	correctChromosome	chr1B_407544263	1B	45.4835
chr1B_407544189	chr1B	407544189	TraesCS1B01G226800	NA	correctChromosome	chr1B_407544263	1B	45.4835
chr1B_407291486	chr1B	407291486	TraesCS1B01G226400	NA	correctChromosome	chr1B_407544263	1B	45.4835
chr1B_406347770	chr1B	406347770	TraesCS1B01G226300	NA	correctChromosome	chr1B_407544263	1B	45.4835
chr1B_408641484	chr1B	408641484	TraesCS1B01G227300-TraesCS1B01G227400	NA	correctChromosome	chr1B_407544263	1B	45.4835
chr1A_300724214	chr1A	300724214	TraesCS1A01G168000	NA	wrongChromosome	chr1B_407544263	1B	45.4835
chr1B_406435796	chr1B	406435796	TraesCS1B01G226300-TraesCS1B01G226400	NA	correctChromosome	chr1B_407544263	1B	45.4835
chr1B_409630008	chr1B	409630008	TraesCS1B01G228100	NA	correctChromosome	chr1B_407544263	1B	45.4835
chr1B_409630041	chr1B	409630041	TraesCS1B01G228100	NA	correctChromosome	chr1B_407544263	1B	45.4835
chr1B_408656773	chr1B	408656773	TraesCS1B01G227400	NA	correctChromosome	chr1B_407544263	1B	45.4835
chr1B_408641580	chr1B	408641580	TraesCS1B01G227300-TraesCS1B01G227400	NA	correctChromosome	chr1B_407544263	1B	45.4835
chr1B_408666574	chr1B	408666574	TraesCS1B01G227500	NA	correctChromosome	chr1B_407544263	1B	45.4835
chr1B_406352547	chr1B	406352547	TraesCS1B01G226300	NA	correctChromosome	chr1B_407544263	1B	45.4835
chr1B_406441095	chr1B	406441095	TraesCS1B01G226300-TraesCS1B01G226400	NA	correctChromosome	chr1B_407544263	1B	45.4835
chr1B_406358575	chr1B	406358575	TraesCS1B01G226300	NA	correctChromosome	chr1B_407544263	1B	45.4835
chr1B_408658546	chr1B	408658546	TraesCS1B01G227400	NA	correctChromosome	chr1B_407544263	1B	45.4835
chr1B_408662387	chr1B	408662387	TraesCS1B01G227500	NA	correctChromosome	chr1B_407544263	1B	45.4835
chr1B_408639199	chr1B	408639199	TraesCS1B01G227300-TraesCS1B01G227400	NA	correctChromosome	chr1B_408639199	1B	40.1246
chr1B_408641531	chr1B	408641531	TraesCS1B01G227300-TraesCS1B01G227400	NA	correctChromosome	chr1B_408641531	1B	47.7183
chr1B_41085538	chr1B	41085538	TraesCS1B01G058600	NA	correctChromosome	chr1B_41085538	1B	15.7766
chr1B_41088066	chr1B	41088066	TraesCS1B01G058600	NA	correctChromosome	chr1B_41085538	1B	15.7766
chr1B_41641824	chr1B	41641824	TraesCS1B01G059000	NA	correctChromosome	chr1B_41085538	1B	15.7766
chr1B_41092279	chr1B	41092279	TraesCS1B01G058700	NA	correctChromosome	chr1B_41085538	1B	15.7766
chr1B_41642210	chr1B	41642210	TraesCS1B01G059000	NA	correctChromosome	chr1B_41085538	1B	15.7766
chr1B_41641714	chr1B	41641714	TraesCS1B01G059000	NA	correctChromosome	chr1B_41085538	1B	15.7766
chr1B_41642248	chr1B	41642248	TraesCS1B01G059000	NA	correctChromosome	chr1B_41085538	1B	15.7766
chr1B_41731056	chr1B	41731056	TraesCS1B01G059000-TraesCS1B01G059100	NA	correctChromosome	chr1B_41731056	1B	17.104
chr1B_419204374	chr1B	419204374	TraesCS1B01G233500	NA	correctChromosome	chr1B_419204374	1B	49.3102
chr1B_420355285	chr1B	420355285	TraesCS1B01G234400	NA	correctChromosome	chr1B_420355285	1B	48.668
chr1B_445746322	chr1B	445746322	TraesCS1B01G252900	NA	correctChromosome	chr1B_432824568	1B	53.1247
chr1B_449391519	chr1B	449391519	TraesCS1B01G254800	NA	correctChromosome	chr1B_432824568	1B	53.1247
chr1B_432824568	chr1B	432824568	TraesCS1B01G243800	NA	correctChromosome	chr1B_432824568	1B	53.1247
chr1B_451920975	chr1B	451920975	TraesCS1B01G256400	NA	correctChromosome	chr1B_432824568	1B	53.1247
chr1B_456154971	chr1B	456154971	TraesCS1B01G258600-TraesCS1B01G258700	NA	correctChromosome	chr1B_432824568	1B	53.1247
chr1B_445746343	chr1B	445746343	TraesCS1B01G252900	NA	correctChromosome	chr1B_432824568	1B	53.1247
chr1B_458633357	chr1B	458633357	TraesCS1B01G261000	NA	correctChromosome	chr1B_432824568	1B	53.1247
chr1B_456185301	chr1B	456185301	TraesCS1B01G258700	NA	correctChromosome	chr1B_432824568	1B	53.1247
chr1B_4349069	chr1B	4349069	TraesCS1B01G008000	NA	correctChromosome	chr1B_4349202	1B	6.44596
chr1B_4345972	chr1B	4345972	TraesCS1B01G008000	NA	correctChromosome	chr1B_4349202	1B	6.44596
chr1B_4320968	chr1B	4320968	TraesCS1B01G007800	NA	correctChromosome	chr1B_4349202	1B	6.44596
chr1B_4476087	chr1B	4476087	TraesCS1B01G008200	NA	correctChromosome	chr1B_4349202	1B	6.44596
chr1B_4347120	chr1B	4347120	TraesCS1B01G008000	NA	correctChromosome	chr1B_4349202	1B	6.44596
chr1B_4349202	chr1B	4349202	TraesCS1B01G008000	NA	correctChromosome	chr1B_4349202	1B	6.44596
chr1B_4478147	chr1B	4478147	TraesCS1B01G008200	NA	correctChromosome	chr1B_4349202	1B	6.44596
chr1B_461902295	chr1B	461902295	TraesCS1B01G262900-TraesCS1B01G263000	NA	correctChromosome	chr1B_443998681	1B	49.7114
chr1B_443998681	chr1B	443998681	TraesCS1B01G251400	NA	correctChromosome	chr1B_443998681	1B	49.7114
chr1B_458190125	chr1B	458190125	TraesCS1B01G260600-TraesCS1B01G260700	NA	correctChromosome	chr1B_449707871	1B	52.4822
chr1B_465241276	chr1B	465241276	TraesCS1B01G264300	NA	correctChromosome	chr1B_449707871	1B	52.4822
chr1B_438034129	chr1B	438034129	TraesCS1B01G247300	NA	correctChromosome	chr1B_449707871	1B	52.4822
chr1B_420357469	chr1B	420357469	TraesCS1B01G234400	NA	correctChromosome	chr1B_449707871	1B	52.4822
chr1B_469974257	chr1B	469974257	TraesCS1B01G267000	NA	correctChromosome	chr1B_449707871	1B	52.4822
chr1B_420353035	chr1B	420353035	TraesCS1B01G234400	NA	correctChromosome	chr1B_449707871	1B	52.4822
chr1B_431456305	chr1B	431456305	TraesCS1B01G243100-TraesCS1B01G243200	NA	correctChromosome	chr1B_449707871	1B	52.4822
chr1B_420365144	chr1B	420365144	TraesCS1B01G234500	NA	correctChromosome	chr1B_449707871	1B	52.4822
chr1B_470003076	chr1B	470003076	TraesCS1B01G267100	NA	correctChromosome	chr1B_449707871	1B	52.4822
chr1B_420355668	chr1B	420355668	TraesCS1B01G234400	NA	correctChromosome	chr1B_449707871	1B	52.4822
chr1B_439433025	chr1B	439433025	TraesCS1B01G248300	NA	correctChromosome	chr1B_449707871	1B	52.4822
chr1B_458189824	chr1B	458189824	TraesCS1B01G260600-TraesCS1B01G260700	NA	correctChromosome	chr1B_449707871	1B	52.4822
chr1B_443995798	chr1B	443995798	TraesCS1B01G251300	NA	correctChromosome	chr1B_449707871	1B	52.4822
chr1B_420355330	chr1B	420355330	TraesCS1B01G234400	NA	correctChromosome	chr1B_449707871	1B	52.4822
chr1B_458265142	chr1B	458265142	TraesCS1B01G260700	NA	correctChromosome	chr1B_449707871	1B	52.4822
chr1B_420354080	chr1B	420354080	TraesCS1B01G234400	NA	correctChromosome	chr1B_449707871	1B	52.4822
chr1B_440267762	chr1B	440267762	TraesCS1B01G248800	NA	correctChromosome	chr1B_449707871	1B	52.4822
chr1B_437604049	chr1B	437604049	TraesCS1B01G247100	NA	correctChromosome	chr1B_449707871	1B	52.4822
chr1B_488037930	chr1B	488037930	TraesCS1B01G279400-TraesCS1B01G279500	NA	correctChromosome	chr1B_449707871	1B	52.4822
chr1B_420365051	chr1B	420365051	TraesCS1B01G234500	NA	correctChromosome	chr1B_449707871	1B	52.4822
chr1B_420415881	chr1B	420415881	TraesCS1B01G234700	NA	correctChromosome	chr1B_449707871	1B	52.4822
chr1B_458189717	chr1B	458189717	TraesCS1B01G260600-TraesCS1B01G260700	NA	correctChromosome	chr1B_449707871	1B	52.4822
chr1B_444686973	chr1B	444686973	TraesCS1B01G251900	NA	correctChromosome	chr1B_449707871	1B	52.4822
chr1B_420359358	chr1B	420359358	TraesCS1B01G234400	NA	correctChromosome	chr1B_449707871	1B	52.4822
chr1B_443997720	chr1B	443997720	TraesCS1B01G251300	NA	correctChromosome	chr1B_449707871	1B	52.4822
chr1B_470777698	chr1B	470777698	TraesCS1B01G267800	NA	correctChromosome	chr1B_449707871	1B	52.4822
chr1B_469160915	chr1B	469160915	TraesCS1B01G266600	NA	correctChromosome	chr1B_449707871	1B	52.4822
chr1B_437860344	chr1B	437860344	TraesCS1B01G247100-TraesCS1B01G247200	NA	correctChromosome	chr1B_449707871	1B	52.4822
chr1B_448300449	chr1B	448300449	TraesCS1B01G254100	NA	correctChromosome	chr1B_449707871	1B	52.4822
chr1B_444937306	chr1B	444937306	TraesCS1B01G252300	NA	correctChromosome	chr1B_449707871	1B	52.4822
chr1B_432376783	chr1B	432376783	TraesCS1B01G243400	NA	correctChromosome	chr1B_449707871	1B	52.4822
chr1B_469977431	chr1B	469977431	TraesCS1B01G267000	NA	correctChromosome	chr1B_449707871	1B	52.4822
chr1B_469976477	chr1B	469976477	TraesCS1B01G267000	NA	correctChromosome	chr1B_449707871	1B	52.4822
chr1B_443996778	chr1B	443996778	TraesCS1B01G251300	NA	correctChromosome	chr1B_449707871	1B	52.4822
chr1B_461899325	chr1B	461899325	TraesCS1B01G262900-TraesCS1B01G263000	NA	correctChromosome	chr1B_449707871	1B	52.4822
chr1B_469974682	chr1B	469974682	TraesCS1B01G267000	NA	correctChromosome	chr1B_449707871	1B	52.4822
chr1B_461897949	chr1B	461897949	TraesCS1B01G262900-TraesCS1B01G263000	NA	correctChromosome	chr1B_449707871	1B	52.4822
chr1B_445746117	chr1B	445746117	TraesCS1B01G252900	NA	correctChromosome	chr1B_449707871	1B	52.4822
chr1B_420353340	chr1B	420353340	TraesCS1B01G234400	NA	correctChromosome	chr1B_449707871	1B	52.4822
chr1B_449391204	chr1B	449391204	TraesCS1B01G254800	NA	correctChromosome	chr1B_449707871	1B	52.4822
chr1B_420366423	chr1B	420366423	TraesCS1B01G234500	NA	correctChromosome	chr1B_449707871	1B	52.4822
chr1B_458633553	chr1B	458633553	TraesCS1B01G261000	NA	correctChromosome	chr1B_449707871	1B	52.4822
chr1B_458327142	chr1B	458327142	TraesCS1B01G260800	NA	correctChromosome	chr1B_449707871	1B	52.4822
chr1B_420355351	chr1B	420355351	TraesCS1B01G234400	NA	correctChromosome	chr1B_449707871	1B	52.4822
chr1B_458327113	chr1B	458327113	TraesCS1B01G260800	NA	correctChromosome	chr1B_449707871	1B	52.4822
chr1B_457463245	chr1B	457463245	TraesCS1B01G260100	NA	correctChromosome	chr1B_449707871	1B	52.4822
chr1B_458189895	chr1B	458189895	TraesCS1B01G260600-TraesCS1B01G260700	NA	correctChromosome	chr1B_449707871	1B	52.4822
chr1B_443996777	chr1B	443996777	TraesCS1B01G251300	NA	correctChromosome	chr1B_449707871	1B	52.4822
chr1B_461902307	chr1B	461902307	TraesCS1B01G262900-TraesCS1B01G263000	NA	correctChromosome	chr1B_449707871	1B	52.4822
chr1B_449707552	chr1B	449707552	TraesCS1B01G255100	NA	correctChromosome	chr1B_449707871	1B	52.4822
chr1B_439128647	chr1B	439128647	TraesCS1B01G248200	NA	correctChromosome	chr1B_449707871	1B	52.4822
chr1B_445435585	chr1B	445435585	TraesCS1B01G252700	NA	correctChromosome	chr1B_449707871	1B	52.4822
chr1B_432377289	chr1B	432377289	TraesCS1B01G243400	NA	correctChromosome	chr1B_449707871	1B	52.4822
chr1B_433598659	chr1B	433598659	TraesCS1B01G244300	NA	correctChromosome	chr1B_449707871	1B	52.4822
chr1B_445746180	chr1B	445746180	TraesCS1B01G252900	NA	correctChromosome	chr1B_449707871	1B	52.4822
chr1B_469999574	chr1B	469999574	TraesCS1B01G267100	NA	correctChromosome	chr1B_449707871	1B	52.4822
chr1B_444686962	chr1B	444686962	TraesCS1B01G251900	NA	correctChromosome	chr1B_449707871	1B	52.4822
chr1B_431457603	chr1B	431457603	TraesCS1B01G243100-TraesCS1B01G243200	NA	correctChromosome	chr1B_449707871	1B	52.4822
chr1B_458189825	chr1B	458189825	TraesCS1B01G260600-TraesCS1B01G260700	NA	correctChromosome	chr1B_449707871	1B	52.4822
chr1B_449706111	chr1B	449706111	TraesCS1B01G255100	NA	correctChromosome	chr1B_449707871	1B	52.4822
chr1B_442165706	chr1B	442165706	TraesCS1B01G250000	NA	correctChromosome	chr1B_449707871	1B	52.4822
chr1B_461896237	chr1B	461896237	TraesCS1B01G262900-TraesCS1B01G263000	NA	correctChromosome	chr1B_449707871	1B	52.4822
chr1B_443468519	chr1B	443468519	TraesCS1B01G251000	NA	correctChromosome	chr1B_449707871	1B	52.4822
chr1B_449254451	chr1B	449254451	TraesCS1B01G254700-TraesCS1B01G254800	NA	correctChromosome	chr1B_449707871	1B	52.4822
chr1B_449707921	chr1B	449707921	TraesCS1B01G255100	NA	correctChromosome	chr1B_449707871	1B	52.4822
chr1B_433600899	chr1B	433600899	TraesCS1B01G244300	NA	correctChromosome	chr1B_449707871	1B	52.4822
chr1B_432821849	chr1B	432821849	TraesCS1B01G243800	NA	correctChromosome	chr1B_449707871	1B	52.4822
chr1B_433600984	chr1B	433600984	TraesCS1B01G244300	NA	correctChromosome	chr1B_449707871	1B	52.4822
chr1B_520468949	chr1B	520468949	TraesCS1B01G299600	NA	correctChromosome	chr1B_449707871	1B	52.4822
chr1B_458633594	chr1B	458633594	TraesCS1B01G261000	NA	correctChromosome	chr1B_449707871	1B	52.4822
chr1B_458633538	chr1B	458633538	TraesCS1B01G261000	NA	correctChromosome	chr1B_449707871	1B	52.4822
chr1B_431457037	chr1B	431457037	TraesCS1B01G243100-TraesCS1B01G243200	NA	correctChromosome	chr1B_449707871	1B	52.4822
chr1B_449704297	chr1B	449704297	TraesCS1B01G255100	NA	correctChromosome	chr1B_449707871	1B	52.4822
chr1B_449707871	chr1B	449707871	TraesCS1B01G255100	NA	correctChromosome	chr1B_449707871	1B	52.4822
chr1B_443996462	chr1B	443996462	TraesCS1B01G251300	NA	correctChromosome	chr1B_449707871	1B	52.4822
chr1B_442213976	chr1B	442213976	TraesCS1B01G250300-TraesCS1B01G250400	NA	correctChromosome	chr1B_449707871	1B	52.4822
chr1B_449391225	chr1B	449391225	TraesCS1B01G254800	NA	correctChromosome	chr1B_449707871	1B	52.4822
chr1B_433598080	chr1B	433598080	TraesCS1B01G244300	NA	correctChromosome	chr1B_449707871	1B	52.4822
chr1B_431456792	chr1B	431456792	TraesCS1B01G243100-TraesCS1B01G243200	NA	correctChromosome	chr1B_449707871	1B	52.4822
chr1B_433598893	chr1B	433598893	TraesCS1B01G244300	NA	correctChromosome	chr1B_449707871	1B	52.4822
chr1B_489902217	chr1B	489902217	TraesCS1B01G281500-TraesCS1B01G281600	NA	correctChromosome	chr1B_449707871	1B	52.4822
chr1B_477403112	chr1B	477403112	TraesCS1B01G271800	NA	correctChromosome	chr1B_449707871	1B	52.4822
chr1B_469978497	chr1B	469978497	TraesCS1B01G267000	NA	correctChromosome	chr1B_449707871	1B	52.4822
chr1B_419203683	chr1B	419203683	TraesCS1B01G233500	NA	correctChromosome	chr1B_449707871	1B	52.4822
chr1B_409677941	chr1B	409677941	TraesCS1B01G228400	NA	correctChromosome	chr1B_449707871	1B	52.4822
chr1B_448244556	chr1B	448244556	TraesCS1B01G254000	NA	correctChromosome	chr1B_449707871	1B	52.4822
chr1B_458189578	chr1B	458189578	TraesCS1B01G260600-TraesCS1B01G260700	NA	correctChromosome	chr1B_449707871	1B	52.4822
chr1B_441629919	chr1B	441629919	TraesCS1B01G249100	NA	correctChromosome	chr1B_449707871	1B	52.4822
chr1B_449390332	chr1B	449390332	TraesCS1B01G254800	NA	correctChromosome	chr1B_449707871	1B	52.4822
chr1B_431456701	chr1B	431456701	TraesCS1B01G243100-TraesCS1B01G243200	NA	correctChromosome	chr1B_449707871	1B	52.4822
chr1B_437551468	chr1B	437551468	TraesCS1B01G247000	NA	correctChromosome	chr1B_449707871	1B	52.4822
chr1B_433601043	chr1B	433601043	TraesCS1B01G244300	NA	correctChromosome	chr1B_449707871	1B	52.4822
chr1B_409677871	chr1B	409677871	TraesCS1B01G228400	NA	correctChromosome	chr1B_449707871	1B	52.4822
chr1B_461311681	chr1B	461311681	TraesCS1B01G262600	NA	correctChromosome	chr1B_449707871	1B	52.4822
chr1B_458325896	chr1B	458325896	TraesCS1B01G260800	NA	correctChromosome	chr1B_449707871	1B	52.4822
chr1B_470778124	chr1B	470778124	TraesCS1B01G267800	NA	correctChromosome	chr1B_449707871	1B	52.4822
chr1B_470003060	chr1B	470003060	TraesCS1B01G267100	NA	correctChromosome	chr1B_449707871	1B	52.4822
chr1B_433600852	chr1B	433600852	TraesCS1B01G244300	NA	correctChromosome	chr1B_449707871	1B	52.4822
chr1B_459928977	chr1B	459928977	TraesCS1B01G261600	NA	correctChromosome	chr1B_449707871	1B	52.4822
chr1B_419204367	chr1B	419204367	TraesCS1B01G233500	NA	correctChromosome	chr1B_449707871	1B	52.4822
chr1B_484889412	chr1B	484889412	TraesCS1B01G277300	NA	correctChromosome	chr1B_449707871	1B	52.4822
chr1B_419982291	chr1B	419982291	TraesCS1B01G234100	NA	correctChromosome	chr1B_449707871	1B	52.4822
chr1B_420362120	chr1B	420362120	TraesCS1B01G234400	NA	correctChromosome	chr1B_449707871	1B	52.4822
chr1B_460280510	chr1B	460280510	TraesCS1B01G262000	NA	correctChromosome	chr1B_449707871	1B	52.4822
chr1B_459925588	chr1B	459925588	TraesCS1B01G261400	NA	correctChromosome	chr1B_449707871	1B	52.4822
chr1B_442206683	chr1B	442206683	TraesCS1B01G250300	NA	correctChromosome	chr1B_449707871	1B	52.4822
chr1B_460143125	chr1B	460143125	TraesCS1B01G261700	NA	correctChromosome	chr1B_449707871	1B	52.4822
chr1B_409677907	chr1B	409677907	TraesCS1B01G228400	NA	correctChromosome	chr1B_449707871	1B	52.4822
chr1B_431456398	chr1B	431456398	TraesCS1B01G243100-TraesCS1B01G243200	NA	correctChromosome	chr1B_449707871	1B	52.4822
chr1B_411570163	chr1B	411570163	TraesCS1B01G229200	NA	correctChromosome	chr1B_449707871	1B	52.4822
chr1B_419204235	chr1B	419204235	TraesCS1B01G233500	NA	correctChromosome	chr1B_449707871	1B	52.4822
chr1B_459933047	chr1B	459933047	TraesCS1B01G261600	NA	correctChromosome	chr1B_449707871	1B	52.4822
chr1B_411558769	chr1B	411558769	TraesCS1B01G229100-TraesCS1B01G229200	NA	correctChromosome	chr1B_449707871	1B	52.4822
chr1B_460275572	chr1B	460275572	TraesCS1B01G262000	NA	correctChromosome	chr1B_449707871	1B	52.4822
chr1B_459929949	chr1B	459929949	TraesCS1B01G261600	NA	correctChromosome	chr1B_449707871	1B	52.4822
chr1B_458633710	chr1B	458633710	TraesCS1B01G261000	NA	correctChromosome	chr1B_449707871	1B	52.4822
chr1B_459925099	chr1B	459925099	TraesCS1B01G261400	NA	correctChromosome	chr1B_449707871	1B	52.4822
chr1B_419203671	chr1B	419203671	TraesCS1B01G233500	NA	correctChromosome	chr1B_449707871	1B	52.4822
chr1B_458633867	chr1B	458633867	TraesCS1B01G261000	NA	correctChromosome	chr1B_449707871	1B	52.4822
chr1B_420356696	chr1B	420356696	TraesCS1B01G234400	NA	correctChromosome	chr1B_449707871	1B	52.4822
chr1B_469974997	chr1B	469974997	TraesCS1B01G267000	NA	correctChromosome	chr1B_449707871	1B	52.4822
chr1B_462795886	chr1B	462795886	TraesCS1B01G263000	NA	correctChromosome	chr1B_462795886	1B	51.8395
chr1B_484889867	chr1B	484889867	TraesCS1B01G277300	NA	correctChromosome	chr1B_488209753	1B	53.8626
chr1B_487407149	chr1B	487407149	TraesCS1B01G279000	NA	correctChromosome	chr1B_488209753	1B	53.8626
chr1B_486777430	chr1B	486777430	TraesCS1B01G278300	NA	correctChromosome	chr1B_488209753	1B	53.8626
chr1B_474118005	chr1B	474118005	TraesCS1B01G269600	NA	correctChromosome	chr1B_488209753	1B	53.8626
chr1B_476342960	chr1B	476342960	TraesCS1B01G271000	NA	correctChromosome	chr1B_488209753	1B	53.8626
chr1B_489200098	chr1B	489200098	TraesCS1B01G280800	NA	correctChromosome	chr1B_488209753	1B	53.8626
chr1B_486345727	chr1B	486345727	TraesCS1B01G277800	NA	correctChromosome	chr1B_488209753	1B	53.8626
chr1B_486971094	chr1B	486971094	TraesCS1B01G278600	NA	correctChromosome	chr1B_488209753	1B	53.8626
chr1B_486970423	chr1B	486970423	TraesCS1B01G278600	NA	correctChromosome	chr1B_488209753	1B	53.8626
chr1B_472635625	chr1B	472635625	TraesCS1B01G268900	NA	correctChromosome	chr1B_488209753	1B	53.8626
chr1B_488475186	chr1B	488475186	TraesCS1B01G280100	NA	correctChromosome	chr1B_488209753	1B	53.8626
chr1B_486975302	chr1B	486975302	TraesCS1B01G278600	NA	correctChromosome	chr1B_488209753	1B	53.8626
chr1B_489131509	chr1B	489131509	TraesCS1B01G280700	NA	correctChromosome	chr1B_488209753	1B	53.8626
chr1B_486969901	chr1B	486969901	TraesCS1B01G278600	NA	correctChromosome	chr1B_488209753	1B	53.8626
chr1B_477394140	chr1B	477394140	TraesCS1B01G271700	NA	correctChromosome	chr1B_488209753	1B	53.8626
chr1B_476033847	chr1B	476033847	TraesCS1B01G270800	NA	correctChromosome	chr1B_488209753	1B	53.8626
chr1B_488819446	chr1B	488819446	TraesCS1B01G280500	NA	correctChromosome	chr1B_488209753	1B	53.8626
chr1B_473867694	chr1B	473867694	TraesCS1B01G269500	NA	correctChromosome	chr1B_488209753	1B	53.8626
chr1B_480372419	chr1B	480372419	TraesCS1B01G273200	NA	correctChromosome	chr1B_488209753	1B	53.8626
chr1B_471177999	chr1B	471177999	TraesCS1B01G268300	NA	correctChromosome	chr1B_488209753	1B	53.8626
chr1B_488208121	chr1B	488208121	TraesCS1B01G279600	NA	correctChromosome	chr1B_488209753	1B	53.8626
chr1B_487496713	chr1B	487496713	TraesCS1B01G279200	NA	correctChromosome	chr1B_488209753	1B	53.8626
chr1B_480819266	chr1B	480819266	TraesCS1B01G273600	NA	correctChromosome	chr1B_488209753	1B	53.8626
chr1B_489132226	chr1B	489132226	TraesCS1B01G280700	NA	correctChromosome	chr1B_488209753	1B	53.8626
chr1B_486346271	chr1B	486346271	TraesCS1B01G277800	NA	correctChromosome	chr1B_488209753	1B	53.8626
chr1B_476333088	chr1B	476333088	TraesCS1B01G271000	NA	correctChromosome	chr1B_488209753	1B	53.8626
chr1B_489201943	chr1B	489201943	TraesCS1B01G280900	NA	correctChromosome	chr1B_488209753	1B	53.8626
chr1B_476078022	chr1B	476078022	TraesCS1B01G270900	NA	correctChromosome	chr1B_488209753	1B	53.8626
chr1B_488037413	chr1B	488037413	TraesCS1B01G279400-TraesCS1B01G279500	NA	correctChromosome	chr1B_488209753	1B	53.8626
chr1B_474446721	chr1B	474446721	TraesCS1B01G269800	NA	correctChromosome	chr1B_488209753	1B	53.8626
chr1B_471197149	chr1B	471197149	TraesCS1B01G268500	NA	correctChromosome	chr1B_488209753	1B	53.8626
chr1B_482716867	chr1B	482716867	TraesCS1B01G275300	NA	correctChromosome	chr1B_488209753	1B	53.8626
chr1B_482716736	chr1B	482716736	TraesCS1B01G275300	NA	correctChromosome	chr1B_488209753	1B	53.8626
chr1B_489206147	chr1B	489206147	TraesCS1B01G280900	NA	correctChromosome	chr1B_488209753	1B	53.8626
chr1B_489994213	chr1B	489994213	TraesCS1B01G281600	NA	correctChromosome	chr1B_488209753	1B	53.8626
chr1B_487672372	chr1B	487672372	TraesCS1B01G279200-TraesCS1B01G279300	NA	correctChromosome	chr1B_488209753	1B	53.8626
chr1B_489134006	chr1B	489134006	TraesCS1B01G280700	NA	correctChromosome	chr1B_488209753	1B	53.8626
chr1B_476079085	chr1B	476079085	TraesCS1B01G270900	NA	correctChromosome	chr1B_488209753	1B	53.8626
chr1B_476342930	chr1B	476342930	TraesCS1B01G271000	NA	correctChromosome	chr1B_488209753	1B	53.8626
chr1B_474450932	chr1B	474450932	TraesCS1B01G269900	NA	correctChromosome	chr1B_488209753	1B	53.8626
chr1B_488209753	chr1B	488209753	TraesCS1B01G279600	NA	correctChromosome	chr1B_488209753	1B	53.8626
chr1B_488475063	chr1B	488475063	TraesCS1B01G280100	NA	correctChromosome	chr1B_488209753	1B	53.8626
chr1B_488038472	chr1B	488038472	TraesCS1B01G279400-TraesCS1B01G279500	NA	correctChromosome	chr1B_488209753	1B	53.8626
chr1B_471193788	chr1B	471193788	TraesCS1B01G268500	NA	correctChromosome	chr1B_488209753	1B	53.8626
chr1B_482164714	chr1B	482164714	TraesCS1B01G274700	NA	correctChromosome	chr1B_488209753	1B	53.8626
chr1B_489993559	chr1B	489993559	TraesCS1B01G281600	NA	correctChromosome	chr1B_488209753	1B	53.8626
chr1B_471174364	chr1B	471174364	TraesCS1B01G268300	NA	correctChromosome	chr1B_488209753	1B	53.8626
chr1B_471174252	chr1B	471174252	TraesCS1B01G268300	NA	correctChromosome	chr1B_488209753	1B	53.8626
chr1B_491084086	chr1B	491084086	TraesCS1B01G282200	NA	correctChromosome	chr1B_488209753	1B	53.8626
chr1B_486346692	chr1B	486346692	TraesCS1B01G277800	NA	correctChromosome	chr1B_488209753	1B	53.8626
chr1B_486492014	chr1B	486492014	TraesCS1B01G278100	NA	correctChromosome	chr1B_488209753	1B	53.8626
chr1B_477403703	chr1B	477403703	TraesCS1B01G271800	NA	correctChromosome	chr1B_488209753	1B	53.8626
chr1B_476332988	chr1B	476332988	TraesCS1B01G271000	NA	correctChromosome	chr1B_488209753	1B	53.8626
chr1B_474446590	chr1B	474446590	TraesCS1B01G269800	NA	correctChromosome	chr1B_488209753	1B	53.8626
chr1B_488474125	chr1B	488474125	TraesCS1B01G280100	NA	correctChromosome	chr1B_488209753	1B	53.8626
chr1B_488037395	chr1B	488037395	TraesCS1B01G279400-TraesCS1B01G279500	NA	correctChromosome	chr1B_488209753	1B	53.8626
chr1B_482178915	chr1B	482178915	TraesCS1B01G274800	NA	correctChromosome	chr1B_488209753	1B	53.8626
chr1B_480819269	chr1B	480819269	TraesCS1B01G273600	NA	correctChromosome	chr1B_488209753	1B	53.8626
chr1B_482164075	chr1B	482164075	TraesCS1B01G274700	NA	correctChromosome	chr1B_488209753	1B	53.8626
chr1B_471194010	chr1B	471194010	TraesCS1B01G268500	NA	correctChromosome	chr1B_488209753	1B	53.8626
chr1B_489131906	chr1B	489131906	TraesCS1B01G280700	NA	correctChromosome	chr1B_488209753	1B	53.8626
chr1B_474451762	chr1B	474451762	TraesCS1B01G269900	NA	correctChromosome	chr1B_488209753	1B	53.8626
chr1B_480372421	chr1B	480372421	TraesCS1B01G273200	NA	correctChromosome	chr1B_488209753	1B	53.8626
chr1B_486969996	chr1B	486969996	TraesCS1B01G278600	NA	correctChromosome	chr1B_488209753	1B	53.8626
chr1B_488208041	chr1B	488208041	TraesCS1B01G279600	NA	correctChromosome	chr1B_488209753	1B	53.8626
chr1B_482698436	chr1B	482698436	TraesCS1B01G275200	NA	correctChromosome	chr1B_488209753	1B	53.8626
chr1B_474263361	chr1B	474263361	TraesCS1B01G269700	NA	correctChromosome	chr1B_488209753	1B	53.8626
chr1B_476019844	chr1B	476019844	TraesCS1B01G270600	NA	correctChromosome	chr1B_488209753	1B	53.8626
chr1B_487406760	chr1B	487406760	TraesCS1B01G279000	NA	correctChromosome	chr1B_488209753	1B	53.8626
chr1B_489201598	chr1B	489201598	TraesCS1B01G280900	NA	correctChromosome	chr1B_488209753	1B	53.8626
chr1B_480848849	chr1B	480848849	TraesCS1B01G273900	NA	correctChromosome	chr1B_488209753	1B	53.8626
chr1B_487489153	chr1B	487489153	TraesCS1B01G279200	NA	correctChromosome	chr1B_488209753	1B	53.8626
chr1B_474259775	chr1B	474259775	TraesCS1B01G269700	NA	correctChromosome	chr1B_488209753	1B	53.8626
chr1B_474120166	chr1B	474120166	TraesCS1B01G269600	NA	correctChromosome	chr1B_488209753	1B	53.8626
chr1B_480367980	chr1B	480367980	TraesCS1B01G273200	NA	correctChromosome	chr1B_488209753	1B	53.8626
chr1B_476019795	chr1B	476019795	TraesCS1B01G270600	NA	correctChromosome	chr1B_488209753	1B	53.8626
chr1B_488037209	chr1B	488037209	TraesCS1B01G279400-TraesCS1B01G279500	NA	correctChromosome	chr1B_488209753	1B	53.8626
chr1B_483291740	chr1B	483291740	TraesCS1B01G275600	NA	correctChromosome	chr1B_488209753	1B	53.8626
chr1B_480848883	chr1B	480848883	TraesCS1B01G273900	NA	correctChromosome	chr1B_488209753	1B	53.8626
chr1B_488823254	chr1B	488823254	TraesCS1B01G280600	NA	correctChromosome	chr1B_488209753	1B	53.8626
chr1B_474119153	chr1B	474119153	TraesCS1B01G269600	NA	correctChromosome	chr1B_488209753	1B	53.8626
chr1B_480370857	chr1B	480370857	TraesCS1B01G273200	NA	correctChromosome	chr1B_488209753	1B	53.8626
chr1B_480820961	chr1B	480820961	TraesCS1B01G273600	NA	correctChromosome	chr1B_488209753	1B	53.8626
chr1B_487496025	chr1B	487496025	TraesCS1B01G279200	NA	correctChromosome	chr1B_488209753	1B	53.8626
chr1B_471520571	chr1B	471520571	TraesCS1B01G268600	NA	correctChromosome	chr1B_488209753	1B	53.8626
chr1B_488037392	chr1B	488037392	TraesCS1B01G279400-TraesCS1B01G279500	NA	correctChromosome	chr1B_488209753	1B	53.8626
chr1B_482713448	chr1B	482713448	TraesCS1B01G275400	NA	correctChromosome	chr1B_488209753	1B	53.8626
chr1B_474262502	chr1B	474262502	TraesCS1B01G269700	NA	correctChromosome	chr1B_488209753	1B	53.8626
chr1B_480367836	chr1B	480367836	TraesCS1B01G273200	NA	correctChromosome	chr1B_488209753	1B	53.8626
chr1B_483290554	chr1B	483290554	TraesCS1B01G275600	NA	correctChromosome	chr1B_488209753	1B	53.8626
chr1B_477394125	chr1B	477394125	TraesCS1B01G271700	NA	correctChromosome	chr1B_488209753	1B	53.8626
chr1B_477404039	chr1B	477404039	TraesCS1B01G271800	NA	correctChromosome	chr1B_488209753	1B	53.8626
chr1B_487496299	chr1B	487496299	TraesCS1B01G279200	NA	correctChromosome	chr1B_488209753	1B	53.8626
chrUn_2263584	chrUn	2263584	TraesCSU01G002400-TraesCSU01G002500	NA	newlyAssign	chr1B_5160022	1B	6.90306
chr1B_5157168	chr1B	5157168	TraesCS1B01G011100	NA	correctChromosome	chr1B_5160022	1B	6.90306
chr1B_5160022	chr1B	5160022	TraesCS1B01G011200	NA	correctChromosome	chr1B_5160022	1B	6.90306
chr1B_520368479	chr1B	520368479	TraesCS1B01G299100	NA	correctChromosome	chr1B_520815045	1B	55.729
chr1B_521001784	chr1B	521001784	TraesCS1B01G300600	NA	correctChromosome	chr1B_520815045	1B	55.729
chr1B_486779557	chr1B	486779557	TraesCS1B01G278300	NA	correctChromosome	chr1B_520815045	1B	55.729
chr1B_518810372	chr1B	518810372	TraesCS1B01G298300	NA	correctChromosome	chr1B_520815045	1B	55.729
chr1B_521001994	chr1B	521001994	TraesCS1B01G300600	NA	correctChromosome	chr1B_520815045	1B	55.729
chr1B_518810342	chr1B	518810342	TraesCS1B01G298300	NA	correctChromosome	chr1B_520815045	1B	55.729
chr1B_498632356	chr1B	498632356	TraesCS1B01G286500	NA	correctChromosome	chr1B_520815045	1B	55.729
chr1B_520366056	chr1B	520366056	TraesCS1B01G299000	NA	correctChromosome	chr1B_520815045	1B	55.729
chr1B_520815163	chr1B	520815163	TraesCS1B01G300100	NA	correctChromosome	chr1B_520815045	1B	55.729
chr1B_522362117	chr1B	522362117	TraesCS1B01G301800	NA	correctChromosome	chr1B_520815045	1B	55.729
chr1B_521218985	chr1B	521218985	TraesCS1B01G300700	NA	correctChromosome	chr1B_520815045	1B	55.729
chr1B_520999685	chr1B	520999685	TraesCS1B01G300600	NA	correctChromosome	chr1B_520815045	1B	55.729
chr1B_520374590	chr1B	520374590	TraesCS1B01G299300	NA	correctChromosome	chr1B_520815045	1B	55.729
chr1B_521225061	chr1B	521225061	TraesCS1B01G300700	NA	correctChromosome	chr1B_520815045	1B	55.729
chr1B_520815045	chr1B	520815045	TraesCS1B01G300100	NA	correctChromosome	chr1B_520815045	1B	55.729
chr1B_521002105	chr1B	521002105	TraesCS1B01G300600	NA	correctChromosome	chr1B_520815045	1B	55.729
chr1B_522357296	chr1B	522357296	TraesCS1B01G301700	NA	correctChromosome	chr1B_520815045	1B	55.729
chr1B_520999113	chr1B	520999113	TraesCS1B01G300600	NA	correctChromosome	chr1B_520815045	1B	55.729
chr1B_520999116	chr1B	520999116	TraesCS1B01G300600	NA	correctChromosome	chr1B_520815045	1B	55.729
chr1B_521001297	chr1B	521001297	TraesCS1B01G300600	NA	correctChromosome	chr1B_520815045	1B	55.729
chr1B_543476456	chr1B	543476456	TraesCS1B01G319100	NA	correctChromosome	chr1B_540993842	1B	55.9714
chr1B_540993842	chr1B	540993842	TraesCS1B01G316400	NA	correctChromosome	chr1B_540993842	1B	55.9714
chr1B_543473932	chr1B	543473932	TraesCS1B01G319100	NA	correctChromosome	chr1B_540993842	1B	55.9714
chr1B_543476316	chr1B	543476316	TraesCS1B01G319100	NA	correctChromosome	chr1B_543476316	1B	57.4258
chr1B_543480538	chr1B	543480538	TraesCS1B01G319200	NA	correctChromosome	chr1B_543476316	1B	57.4258
chr1B_551013055	chr1B	551013055	TraesCS1B01G325000	NA	correctChromosome	chr1B_553633733	1B	58.7108
chr1B_548895626	chr1B	548895626	TraesCS1B01G323700-TraesCS1B01G323800	NA	correctChromosome	chr1B_553633733	1B	58.7108
chr1B_553633733	chr1B	553633733	TraesCS1B01G327500	NA	correctChromosome	chr1B_553633733	1B	58.7108
chr1B_556388614	chr1B	556388614	TraesCS1B01G330700-TraesCS1B01G330800	NA	correctChromosome	chr1B_556388614	1B	59.9956
chr1B_564908616	chr1B	564908616	TraesCS1B01G337400	NA	correctChromosome	chr1B_564908616	1B	61.2798
chr1B_564909233	chr1B	564909233	TraesCS1B01G337400	NA	correctChromosome	chr1B_565670125	1B	61.68
chr1B_564907611	chr1B	564907611	TraesCS1B01G337400	NA	correctChromosome	chr1B_565670125	1B	61.68
chr1B_565669914	chr1B	565669914	TraesCS1B01G337800	NA	correctChromosome	chr1B_565670125	1B	61.68
chr1B_565664346	chr1B	565664346	TraesCS1B01G337800	NA	correctChromosome	chr1B_565670125	1B	61.68
chr1B_564909151	chr1B	564909151	TraesCS1B01G337400	NA	correctChromosome	chr1B_565670125	1B	61.68
chr1B_564907548	chr1B	564907548	TraesCS1B01G337400	NA	correctChromosome	chr1B_565670125	1B	61.68
chr1B_565672749	chr1B	565672749	TraesCS1B01G337800	NA	correctChromosome	chr1B_565670125	1B	61.68
chr1B_565670293	chr1B	565670293	TraesCS1B01G337800	NA	correctChromosome	chr1B_565670125	1B	61.68
chr1B_565672341	chr1B	565672341	TraesCS1B01G337800	NA	correctChromosome	chr1B_565670125	1B	61.68
chr1B_565670125	chr1B	565670125	TraesCS1B01G337800	NA	correctChromosome	chr1B_565670125	1B	61.68
chr1B_564907595	chr1B	564907595	TraesCS1B01G337400	NA	correctChromosome	chr1B_565670125	1B	61.68
chr1B_565335680	chr1B	565335680	TraesCS1B01G337600	NA	correctChromosome	chr1B_565670125	1B	61.68
chr1B_565665048	chr1B	565665048	TraesCS1B01G337800	NA	correctChromosome	chr1B_565670125	1B	61.68
chr1B_566603733	chr1B	566603733	TraesCS1B01G338500	NA	correctChromosome	chr1B_566603733	1B	63.8046
chr1B_566608346	chr1B	566608346	TraesCS1B01G338600	NA	correctChromosome	chr1B_566603733	1B	63.8046
chr1B_565987410	chr1B	565987410	TraesCS1B01G338000-TraesCS1B01G338100	NA	correctChromosome	chr1B_566603733	1B	63.8046
chr1B_566837251	chr1B	566837251	TraesCS1B01G339200	NA	correctChromosome	chr1B_566838346	1B	67.5652
chr1B_566838895	chr1B	566838895	TraesCS1B01G339200	NA	correctChromosome	chr1B_566838346	1B	67.5652
chr1B_566840473	chr1B	566840473	TraesCS1B01G339200	NA	correctChromosome	chr1B_566838346	1B	67.5652
chr1B_566838550	chr1B	566838550	TraesCS1B01G339200	NA	correctChromosome	chr1B_566838346	1B	67.5652
chr1B_566837185	chr1B	566837185	TraesCS1B01G339200	NA	correctChromosome	chr1B_566838346	1B	67.5652
chr1B_568525317	chr1B	568525317	TraesCS1B01G340400	NA	correctChromosome	chr1B_566838346	1B	67.5652
chr1B_566838346	chr1B	566838346	TraesCS1B01G339200	NA	correctChromosome	chr1B_566838346	1B	67.5652
chr1B_566838725	chr1B	566838725	TraesCS1B01G339200	NA	correctChromosome	chr1B_566838346	1B	67.5652
chr1B_566838457	chr1B	566838457	TraesCS1B01G339200	NA	correctChromosome	chr1B_566838346	1B	67.5652
chr1B_566837266	chr1B	566837266	TraesCS1B01G339200	NA	correctChromosome	chr1B_566838346	1B	67.5652
chr1B_566838861	chr1B	566838861	TraesCS1B01G339200	NA	correctChromosome	chr1B_566838346	1B	67.5652
chr1B_566837921	chr1B	566837921	TraesCS1B01G339200	NA	correctChromosome	chr1B_566838346	1B	67.5652
chr1B_566842466	chr1B	566842466	TraesCS1B01G339200	NA	correctChromosome	chr1B_566838346	1B	67.5652
chr1B_566837849	chr1B	566837849	TraesCS1B01G339200	NA	correctChromosome	chr1B_566838346	1B	67.5652
chr1B_566832991	chr1B	566832991	TraesCS1B01G339100	NA	correctChromosome	chr1B_566838346	1B	67.5652
chr1B_568968300	chr1B	568968300	TraesCS1B01G341100	NA	correctChromosome	chr1B_566838346	1B	67.5652
chr1B_566839272	chr1B	566839272	TraesCS1B01G339200	NA	correctChromosome	chr1B_566838346	1B	67.5652
chr1B_568521957	chr1B	568521957	TraesCS1B01G340300	NA	correctChromosome	chr1B_566838346	1B	67.5652
chr1B_568968795	chr1B	568968795	TraesCS1B01G341100	NA	correctChromosome	chr1B_566838346	1B	67.5652
chr1B_566831658	chr1B	566831658	TraesCS1B01G339000	NA	correctChromosome	chr1B_566838346	1B	67.5652
chr1B_566981029	chr1B	566981029	TraesCS1B01G339500	NA	correctChromosome	chr1B_566838346	1B	67.5652
chr1B_566823488	chr1B	566823488	TraesCS1B01G339000	NA	correctChromosome	chr1B_566838346	1B	67.5652
chr1B_566847779	chr1B	566847779	TraesCS1B01G339200	NA	correctChromosome	chr1B_566838346	1B	67.5652
chr1B_568522799	chr1B	568522799	TraesCS1B01G340300	NA	correctChromosome	chr1B_566838346	1B	67.5652
chr1B_566844352	chr1B	566844352	TraesCS1B01G339200	NA	correctChromosome	chr1B_566838346	1B	67.5652
chr1B_568522084	chr1B	568522084	TraesCS1B01G340300	NA	correctChromosome	chr1B_566838346	1B	67.5652
chr1B_571056933	chr1B	571056933	TraesCS1B01G342600	NA	correctChromosome	chr1B_570295547	1B	70.9489
chr1B_570293194	chr1B	570293194	TraesCS1B01G342200	NA	correctChromosome	chr1B_570295547	1B	70.9489
chr1B_572298148	chr1B	572298148	TraesCS1B01G343900	NA	correctChromosome	chr1B_570295547	1B	70.9489
chr1B_572297017	chr1B	572297017	TraesCS1B01G343900	NA	correctChromosome	chr1B_570295547	1B	70.9489
chr1B_571060426	chr1B	571060426	TraesCS1B01G342600	NA	correctChromosome	chr1B_570295547	1B	70.9489
chr1B_571061468	chr1B	571061468	TraesCS1B01G342600	NA	correctChromosome	chr1B_570295547	1B	70.9489
chr1B_571060373	chr1B	571060373	TraesCS1B01G342600	NA	correctChromosome	chr1B_570295547	1B	70.9489
chr1B_572532751	chr1B	572532751	TraesCS1B01G344100	NA	correctChromosome	chr1B_570295547	1B	70.9489
chr1B_572299087	chr1B	572299087	TraesCS1B01G343900	NA	correctChromosome	chr1B_570295547	1B	70.9489
chr1B_570301846	chr1B	570301846	TraesCS1B01G342200	NA	correctChromosome	chr1B_570295547	1B	70.9489
chr1B_570295641	chr1B	570295641	TraesCS1B01G342200	NA	correctChromosome	chr1B_570295547	1B	70.9489
chr1B_572298731	chr1B	572298731	TraesCS1B01G343900	NA	correctChromosome	chr1B_570295547	1B	70.9489
chr1B_570303477	chr1B	570303477	TraesCS1B01G342200	NA	correctChromosome	chr1B_570295547	1B	70.9489
chr1B_570295547	chr1B	570295547	TraesCS1B01G342200	NA	correctChromosome	chr1B_570295547	1B	70.9489
chr1B_571060544	chr1B	571060544	TraesCS1B01G342600	NA	correctChromosome	chr1B_570295547	1B	70.9489
chr1B_571060292	chr1B	571060292	TraesCS1B01G342600	NA	correctChromosome	chr1B_570295547	1B	70.9489
chr1B_570841370	chr1B	570841370	TraesCS1B01G342500-TraesCS1B01G342600	NA	correctChromosome	chr1B_570295547	1B	70.9489
chr1B_570841018	chr1B	570841018	TraesCS1B01G342500-TraesCS1B01G342600	NA	correctChromosome	chr1B_570295547	1B	70.9489
chr1B_570292306	chr1B	570292306	TraesCS1B01G342200	NA	correctChromosome	chr1B_570295547	1B	70.9489
chr1B_566833867	chr1B	566833867	TraesCS1B01G339100	NA	correctChromosome	chr1B_570295547	1B	70.9489
chr1B_570294526	chr1B	570294526	TraesCS1B01G342200	NA	correctChromosome	chr1B_570295547	1B	70.9489
chr1B_572297927	chr1B	572297927	TraesCS1B01G343900	NA	correctChromosome	chr1B_572297927	1B	69.9326
chr1B_568572077	chr1B	568572077	TraesCS1B01G340600	NA	correctChromosome	chr1B_572297927	1B	69.9326
chr1B_572302675	chr1B	572302675	TraesCS1B01G343900	NA	correctChromosome	chr1B_572297927	1B	69.9326
chr1B_584147579	chr1B	584147579	TraesCS1B01G354400	NA	correctChromosome	chr1B_584147579	1B	76.9455
chr1B_586300960	chr1B	586300960	TraesCS1B01G357000	NA	correctChromosome	chr1B_586296112	1B	80.9101
chr1B_586289417	chr1B	586289417	TraesCS1B01G356900	NA	correctChromosome	chr1B_586296112	1B	80.9101
chr1B_586301558	chr1B	586301558	TraesCS1B01G357000	NA	correctChromosome	chr1B_586296112	1B	80.9101
chr1B_586299565	chr1B	586299565	TraesCS1B01G357000	NA	correctChromosome	chr1B_586296112	1B	80.9101
chr1B_586299496	chr1B	586299496	TraesCS1B01G357000	NA	correctChromosome	chr1B_586296112	1B	80.9101
chr1B_586300450	chr1B	586300450	TraesCS1B01G357000	NA	correctChromosome	chr1B_586296112	1B	80.9101
chr1B_584148672	chr1B	584148672	TraesCS1B01G354400	NA	correctChromosome	chr1B_586296112	1B	80.9101
chr1B_586301582	chr1B	586301582	TraesCS1B01G357000	NA	correctChromosome	chr1B_586296112	1B	80.9101
chr1B_586292467	chr1B	586292467	TraesCS1B01G356900	NA	correctChromosome	chr1B_586296112	1B	80.9101
chr1B_586296112	chr1B	586296112	TraesCS1B01G356900	NA	correctChromosome	chr1B_586296112	1B	80.9101
chr1B_586300692	chr1B	586300692	TraesCS1B01G357000	NA	correctChromosome	chr1B_586296112	1B	80.9101
chr1B_586302038	chr1B	586302038	TraesCS1B01G357000	NA	correctChromosome	chr1B_586296112	1B	80.9101
chr1B_586299065	chr1B	586299065	TraesCS1B01G357000	NA	correctChromosome	chr1B_586296112	1B	80.9101
chr1B_586302721	chr1B	586302721	TraesCS1B01G357000	NA	correctChromosome	chr1B_586301887	1B	99.8097
chr1B_586302134	chr1B	586302134	TraesCS1B01G357000	NA	correctChromosome	chr1B_586301887	1B	99.8097
chr1B_586301887	chr1B	586301887	TraesCS1B01G357000	NA	correctChromosome	chr1B_586301887	1B	99.8097
chr1B_586302176	chr1B	586302176	TraesCS1B01G357000	NA	correctChromosome	chr1B_586301887	1B	99.8097
chr1B_586302733	chr1B	586302733	TraesCS1B01G357000	NA	correctChromosome	chr1B_586301887	1B	99.8097
chr1B_586301596	chr1B	586301596	TraesCS1B01G357000	NA	correctChromosome	chr1B_586301887	1B	99.8097
chr1B_588509786	chr1B	588509786	TraesCS1B01G359500-TraesCS1B01G359600	NA	correctChromosome	chr1B_588509786	1B	84.0745
chr1B_613422223	chr1B	613422223	TraesCS1B01G381000	NA	correctChromosome	chr1B_613236702	1B	104.085
chr1B_613423115	chr1B	613423115	TraesCS1B01G381000	NA	correctChromosome	chr1B_613236702	1B	104.085
chr1B_613323162	chr1B	613323162	TraesCS1B01G380500	NA	correctChromosome	chr1B_613236702	1B	104.085
chr1B_613422409	chr1B	613422409	TraesCS1B01G381000	NA	correctChromosome	chr1B_613236702	1B	104.085
chr1B_613324675	chr1B	613324675	TraesCS1B01G380500	NA	correctChromosome	chr1B_613236702	1B	104.085
chr1B_613236084	chr1B	613236084	TraesCS1B01G380300	NA	correctChromosome	chr1B_613236702	1B	104.085
chr1B_613324736	chr1B	613324736	TraesCS1B01G380500	NA	correctChromosome	chr1B_613236702	1B	104.085
chr1B_613236702	chr1B	613236702	TraesCS1B01G380300	NA	correctChromosome	chr1B_613236702	1B	104.085
chr1B_614457202	chr1B	614457202	TraesCS1B01G382100	NA	correctChromosome	chr1B_614457202	1B	122.695
chr1B_619692239	chr1B	619692239	TraesCS1B01G386100-TraesCS1B01G386200	NA	correctChromosome	chr1B_619692239	1B	111.567
chr1D_452430208	chr1D	452430208	TraesCS1D01G375500	NA	wrongChromosome	chr1B_619692239	1B	111.567
chr1B_622478190	chr1B	622478190	TraesCS1B01G388800	NA	correctChromosome	chr1B_622478190	1B	112.429
chr1B_622482194	chr1B	622482194	TraesCS1B01G388800	NA	correctChromosome	chr1B_622478190	1B	112.429
chr1B_622469634	chr1B	622469634	TraesCS1B01G388700	NA	correctChromosome	chr1B_622478190	1B	112.429
chr1B_622467480	chr1B	622467480	TraesCS1B01G388700	NA	correctChromosome	chr1B_622478190	1B	112.429
chr1B_622481075	chr1B	622481075	TraesCS1B01G388800	NA	correctChromosome	chr1B_622478190	1B	112.429
chr1B_622467121	chr1B	622467121	TraesCS1B01G388700	NA	correctChromosome	chr1B_622478190	1B	112.429
chr1B_621954525	chr1B	621954525	TraesCS1B01G387600	NA	correctChromosome	chr1B_622478190	1B	112.429
chr1B_622469391	chr1B	622469391	TraesCS1B01G388700	NA	correctChromosome	chr1B_622478190	1B	112.429
chr1B_623722735	chr1B	623722735	TraesCS1B01G390000	NA	correctChromosome	chr1B_623722735	1B	135.5
chr1B_662556308	chr1B	662556308	TraesCS1B01G441700	towardStettler	correctChromosome	chr1B_662556308	1B	102.157
chr1B_662556490	chr1B	662556490	TraesCS1B01G441700	NA	correctChromosome	chr1B_662556490	1B	103.061
chr1B_662557988	chr1B	662557988	TraesCS1B01G441700	towardStettler	correctChromosome	chr1B_662556490	1B	103.061
chr1B_662666584	chr1B	662666584	TraesCS1B01G441900	NA	correctChromosome	chr1B_664772578	1B	84.5854
chr1B_664804204	chr1B	664804204	TraesCS1B01G443700	NA	correctChromosome	chr1B_664772578	1B	84.5854
chr1B_664598279	chr1B	664598279	TraesCS1B01G443300-TraesCS1B01G443400	NA	correctChromosome	chr1B_664772578	1B	84.5854
chr1B_664803891	chr1B	664803891	TraesCS1B01G443700	NA	correctChromosome	chr1B_664772578	1B	84.5854
chr1B_664804044	chr1B	664804044	TraesCS1B01G443700	NA	correctChromosome	chr1B_664772578	1B	84.5854
chr1B_662669034	chr1B	662669034	TraesCS1B01G441900	NA	correctChromosome	chr1B_664772578	1B	84.5854
chr1B_664772578	chr1B	664772578	TraesCS1B01G443500-TraesCS1B01G443600	NA	correctChromosome	chr1B_664772578	1B	84.5854
chr1B_664287876	chr1B	664287876	TraesCS1B01G443100	NA	correctChromosome	chr1B_664772578	1B	84.5854
chr1B_664954261	chr1B	664954261	TraesCS1B01G443900	NA	correctChromosome	chr1B_664772578	1B	84.5854
chr1B_664976808	chr1B	664976808	TraesCS1B01G444000	NA	correctChromosome	chr1B_664772578	1B	84.5854
chr1B_664302506	chr1B	664302506	TraesCS1B01G443200	NA	correctChromosome	chr1B_664772578	1B	84.5854
chr1B_662667377	chr1B	662667377	TraesCS1B01G441900	NA	correctChromosome	chr1B_664772578	1B	84.5854
chr1B_662068473	chr1B	662068473	TraesCS1B01G441000	NA	correctChromosome	chr1B_664772578	1B	84.5854
chr1B_664955588	chr1B	664955588	TraesCS1B01G443900	NA	correctChromosome	chr1B_664772578	1B	84.5854
chr1B_662666060	chr1B	662666060	TraesCS1B01G441900	NA	correctChromosome	chr1B_664772578	1B	84.5854
chr1B_664772511	chr1B	664772511	TraesCS1B01G443500-TraesCS1B01G443600	NA	correctChromosome	chr1B_664772578	1B	84.5854
chr1B_662668384	chr1B	662668384	TraesCS1B01G441900	NA	correctChromosome	chr1B_664772578	1B	84.5854
chr1B_665309885	chr1B	665309885	TraesCS1B01G445200	NA	correctChromosome	chr1B_665309885	1B	103.555
chr1B_669027529	chr1B	669027529	TraesCS1B01G452000	NA	correctChromosome	chr1B_665309885	1B	103.555
chr1B_665314530	chr1B	665314530	TraesCS1B01G445200	NA	correctChromosome	chr1B_665309885	1B	103.555
chr1B_665452876	chr1B	665452876	TraesCS1B01G445600	NA	correctChromosome	chr1B_665309885	1B	103.555
chr1B_665453258	chr1B	665453258	TraesCS1B01G445600	NA	correctChromosome	chr1B_665309885	1B	103.555
chr1B_665314529	chr1B	665314529	TraesCS1B01G445200	NA	correctChromosome	chr1B_665309885	1B	103.555
chr1B_665453048	chr1B	665453048	TraesCS1B01G445600	NA	correctChromosome	chr1B_665309885	1B	103.555
chr1B_665454789	chr1B	665454789	TraesCS1B01G445600	NA	correctChromosome	chr1B_665309885	1B	103.555
chr1B_667975736	chr1B	667975736	TraesCS1B01G449200-TraesCS1B01G449300	NA	correctChromosome	chr1B_667975155	1B	104.637
chr1B_667975726	chr1B	667975726	TraesCS1B01G449200-TraesCS1B01G449300	NA	correctChromosome	chr1B_667975155	1B	104.637
chr1B_668762924	chr1B	668762924	TraesCS1B01G450700	NA	correctChromosome	chr1B_667975155	1B	104.637
chr1B_668468896	chr1B	668468896	TraesCS1B01G450300	NA	correctChromosome	chr1B_667975155	1B	104.637
chr1B_667677853	chr1B	667677853	TraesCS1B01G448300	NA	correctChromosome	chr1B_667975155	1B	104.637
chr1B_668469054	chr1B	668469054	TraesCS1B01G450300	NA	correctChromosome	chr1B_667975155	1B	104.637
chr1B_667681973	chr1B	667681973	TraesCS1B01G448300	NA	correctChromosome	chr1B_667975155	1B	104.637
chr1B_667975744	chr1B	667975744	TraesCS1B01G449200-TraesCS1B01G449300	NA	correctChromosome	chr1B_667975155	1B	104.637
chr1B_668244990	chr1B	668244990	TraesCS1B01G450100-TraesCS1B01G450200	NA	correctChromosome	chr1B_667975155	1B	104.637
chr1B_668760194	chr1B	668760194	TraesCS1B01G450700	NA	correctChromosome	chr1B_667975155	1B	104.637
chr1B_668126480	chr1B	668126480	TraesCS1B01G449600	NA	correctChromosome	chr1B_667975155	1B	104.637
chr1B_668471060	chr1B	668471060	TraesCS1B01G450300	NA	correctChromosome	chr1B_667975155	1B	104.637
chr1B_668470136	chr1B	668470136	TraesCS1B01G450300	NA	correctChromosome	chr1B_667975155	1B	104.637
chr1B_668123517	chr1B	668123517	TraesCS1B01G449600	NA	correctChromosome	chr1B_667975155	1B	104.637
chr1B_668762966	chr1B	668762966	TraesCS1B01G450700	NA	correctChromosome	chr1B_667975155	1B	104.637
chr1B_668759651	chr1B	668759651	TraesCS1B01G450700	NA	correctChromosome	chr1B_667975155	1B	104.637
chr1B_667229049	chr1B	667229049	TraesCS1B01G447600	NA	correctChromosome	chr1B_667975155	1B	104.637
chr1B_668937619	chr1B	668937619	TraesCS1B01G451500	NA	correctChromosome	chr1B_667975155	1B	104.637
chr1B_667214342	chr1B	667214342	TraesCS1B01G447500	NA	correctChromosome	chr1B_667975155	1B	104.637
chr1B_667975155	chr1B	667975155	TraesCS1B01G449200-TraesCS1B01G449300	NA	correctChromosome	chr1B_667975155	1B	104.637
chr1B_668124748	chr1B	668124748	TraesCS1B01G449600	NA	correctChromosome	chr1B_667975155	1B	104.637
chr1B_669027556	chr1B	669027556	TraesCS1B01G452000	NA	correctChromosome	chr1B_667975155	1B	104.637
chr1B_668966383	chr1B	668966383	TraesCS1B01G451700	NA	correctChromosome	chr1B_667975155	1B	104.637
chr1B_668762551	chr1B	668762551	TraesCS1B01G450700	NA	correctChromosome	chr1B_667975155	1B	104.637
chr1B_668473755	chr1B	668473755	TraesCS1B01G450300	NA	correctChromosome	chr1B_667975155	1B	104.637
chr1B_667677860	chr1B	667677860	TraesCS1B01G448300	NA	correctChromosome	chr1B_667975155	1B	104.637
chr1B_668762903	chr1B	668762903	TraesCS1B01G450700	NA	correctChromosome	chr1B_667975155	1B	104.637
chr1B_668939750	chr1B	668939750	TraesCS1B01G451500	NA	correctChromosome	chr1B_667975155	1B	104.637
chr1B_667677861	chr1B	667677861	TraesCS1B01G448300	NA	correctChromosome	chr1B_667975155	1B	104.637
chr1B_668939708	chr1B	668939708	TraesCS1B01G451500	NA	correctChromosome	chr1B_667975155	1B	104.637
chr1B_667965691	chr1B	667965691	TraesCS1B01G449200	NA	correctChromosome	chr1B_667975155	1B	104.637
chr1B_668471115	chr1B	668471115	TraesCS1B01G450300	NA	correctChromosome	chr1B_667975155	1B	104.637
chr1B_667226828	chr1B	667226828	TraesCS1B01G447600	NA	correctChromosome	chr1B_667975155	1B	104.637
chr1B_668472233	chr1B	668472233	TraesCS1B01G450300	NA	correctChromosome	chr1B_667975155	1B	104.637
chr1B_668200656	chr1B	668200656	TraesCS1B01G450100	NA	correctChromosome	chr1B_667975155	1B	104.637
chr1B_677914707	chr1B	677914707	TraesCS1B01G468600	NA	correctChromosome	chr1B_673639695	1B	138.395
chr1B_678049404	chr1B	678049404	TraesCS1B01G468700	NA	correctChromosome	chr1B_673639695	1B	138.395
chr1B_679757474	chr1B	679757474	TraesCS1B01G472100	NA	correctChromosome	chr1B_673639695	1B	138.395
chr1B_673784849	chr1B	673784849	TraesCS1B01G459800	NA	correctChromosome	chr1B_673639695	1B	138.395
chr1B_673784295	chr1B	673784295	TraesCS1B01G459800	NA	correctChromosome	chr1B_673639695	1B	138.395
chr1B_676776721	chr1B	676776721	TraesCS1B01G466300	NA	correctChromosome	chr1B_673639695	1B	138.395
chr1B_677914723	chr1B	677914723	TraesCS1B01G468600	NA	correctChromosome	chr1B_673639695	1B	138.395
chr1B_677914352	chr1B	677914352	TraesCS1B01G468600	NA	correctChromosome	chr1B_673639695	1B	138.395
chr1B_677913904	chr1B	677913904	TraesCS1B01G468600	NA	correctChromosome	chr1B_673639695	1B	138.395
chr1B_673786114	chr1B	673786114	TraesCS1B01G459800	NA	correctChromosome	chr1B_673639695	1B	138.395
chr1B_679748923	chr1B	679748923	TraesCS1B01G472000	NA	correctChromosome	chr1B_673639695	1B	138.395
chr1B_673784525	chr1B	673784525	TraesCS1B01G459800	NA	correctChromosome	chr1B_673639695	1B	138.395
chr1B_679031107	chr1B	679031107	TraesCS1B01G470800	NA	correctChromosome	chr1B_673639695	1B	138.395
chr1B_673642055	chr1B	673642055	TraesCS1B01G459500	NA	correctChromosome	chr1B_673639695	1B	138.395
chr1B_673784846	chr1B	673784846	TraesCS1B01G459800	NA	correctChromosome	chr1B_673639695	1B	138.395
chr1B_668248040	chr1B	668248040	TraesCS1B01G450100-TraesCS1B01G450200	NA	correctChromosome	chr1B_673639695	1B	138.395
chr1B_673784675	chr1B	673784675	TraesCS1B01G459800	NA	correctChromosome	chr1B_673639695	1B	138.395
chr1B_679757609	chr1B	679757609	TraesCS1B01G472100	NA	correctChromosome	chr1B_673639695	1B	138.395
chr1B_678049417	chr1B	678049417	TraesCS1B01G468700	NA	correctChromosome	chr1B_673639695	1B	138.395
chr1B_679031356	chr1B	679031356	TraesCS1B01G470800	NA	correctChromosome	chr1B_673639695	1B	138.395
chr1B_674498454	chr1B	674498454	TraesCS1B01G461500	NA	correctChromosome	chr1B_673639695	1B	138.395
chr1B_676711397	chr1B	676711397	TraesCS1B01G465900	NA	correctChromosome	chr1B_673639695	1B	138.395
chr1B_679748932	chr1B	679748932	TraesCS1B01G472000	NA	correctChromosome	chr1B_673639695	1B	138.395
chr1B_679757492	chr1B	679757492	TraesCS1B01G472100	NA	correctChromosome	chr1B_673639695	1B	138.395
chr1B_628518206	chr1B	628518206	TraesCS1B01G396800	NA	correctChromosome	chr1B_673639695	1B	138.395
chr1B_674625158	chr1B	674625158	TraesCS1B01G461900	NA	correctChromosome	chr1B_673639695	1B	138.395
chr1B_673642011	chr1B	673642011	TraesCS1B01G459500	NA	correctChromosome	chr1B_673639695	1B	138.395
chr1B_673640094	chr1B	673640094	TraesCS1B01G459500	NA	correctChromosome	chr1B_673639695	1B	138.395
chr1B_673784528	chr1B	673784528	TraesCS1B01G459800	NA	correctChromosome	chr1B_673639695	1B	138.395
chr1B_628006420	chr1B	628006420	TraesCS1B01G396300	NA	correctChromosome	chr1B_673639695	1B	138.395
chr1B_673178018	chr1B	673178018	TraesCS1B01G459300	NA	correctChromosome	chr1B_673639695	1B	138.395
chr1B_673640864	chr1B	673640864	TraesCS1B01G459500	NA	correctChromosome	chr1B_673639695	1B	138.395
chr1B_679749200	chr1B	679749200	TraesCS1B01G472000	NA	correctChromosome	chr1B_673639695	1B	138.395
chr1B_679748501	chr1B	679748501	TraesCS1B01G472000	NA	correctChromosome	chr1B_673639695	1B	138.395
chr1B_628514633	chr1B	628514633	TraesCS1B01G396800	NA	correctChromosome	chr1B_673639695	1B	138.395
chr1B_675376769	chr1B	675376769	TraesCS1B01G463100	NA	correctChromosome	chr1B_673639695	1B	138.395
chr1B_679031153	chr1B	679031153	TraesCS1B01G470800	NA	correctChromosome	chr1B_673639695	1B	138.395
chr1B_673784357	chr1B	673784357	TraesCS1B01G459800	NA	correctChromosome	chr1B_673639695	1B	138.395
chr1B_674619794	chr1B	674619794	TraesCS1B01G461900	NA	correctChromosome	chr1B_673639695	1B	138.395
chr1B_674621258	chr1B	674621258	TraesCS1B01G461900	NA	correctChromosome	chr1B_673639695	1B	138.395
chr1B_678049048	chr1B	678049048	TraesCS1B01G468700	NA	correctChromosome	chr1B_673639695	1B	138.395
chr1B_677913901	chr1B	677913901	TraesCS1B01G468600	NA	correctChromosome	chr1B_673639695	1B	138.395
chr1B_628006273	chr1B	628006273	TraesCS1B01G396300	NA	correctChromosome	chr1B_673639695	1B	138.395
chr1B_673785689	chr1B	673785689	TraesCS1B01G459800	NA	correctChromosome	chr1B_673639695	1B	138.395
chr1B_677093298	chr1B	677093298	TraesCS1B01G467100	NA	correctChromosome	chr1B_673639695	1B	138.395
chr1B_673786213	chr1B	673786213	TraesCS1B01G459800	NA	correctChromosome	chr1B_673639695	1B	138.395
chr1B_629158850	chr1B	629158850	TraesCS1B01G398100-TraesCS1B01G398200	NA	correctChromosome	chr1B_673639695	1B	138.395
chr1B_673786162	chr1B	673786162	TraesCS1B01G459800	NA	correctChromosome	chr1B_673639695	1B	138.395
chr1B_676711486	chr1B	676711486	TraesCS1B01G465900	NA	correctChromosome	chr1B_673639695	1B	138.395
chr1B_628006247	chr1B	628006247	TraesCS1B01G396300	NA	correctChromosome	chr1B_673639695	1B	138.395
chr1B_673640885	chr1B	673640885	TraesCS1B01G459500	NA	correctChromosome	chr1B_673639695	1B	138.395
chr1B_673642008	chr1B	673642008	TraesCS1B01G459500	NA	correctChromosome	chr1B_673639695	1B	138.395
chr1B_627946683	chr1B	627946683	TraesCS1B01G396100	NA	correctChromosome	chr1B_673639695	1B	138.395
chr1B_673786315	chr1B	673786315	TraesCS1B01G459800	NA	correctChromosome	chr1B_673639695	1B	138.395
chr1B_673642068	chr1B	673642068	TraesCS1B01G459500	NA	correctChromosome	chr1B_673639695	1B	138.395
chr1B_679755810	chr1B	679755810	TraesCS1B01G472100	NA	correctChromosome	chr1B_673639695	1B	138.395
chr1B_673786120	chr1B	673786120	TraesCS1B01G459800	NA	correctChromosome	chr1B_673639695	1B	138.395
chr1B_679755362	chr1B	679755362	TraesCS1B01G472100	NA	correctChromosome	chr1B_673639695	1B	138.395
chr1B_673786486	chr1B	673786486	TraesCS1B01G459800	NA	correctChromosome	chr1B_673639695	1B	138.395
chr1B_674080971	chr1B	674080971	TraesCS1B01G461000	NA	correctChromosome	chr1B_673639695	1B	138.395
chr1B_628053852	chr1B	628053852	TraesCS1B01G396600	NA	correctChromosome	chr1B_673639695	1B	138.395
chr1B_673785940	chr1B	673785940	TraesCS1B01G459800	NA	correctChromosome	chr1B_673639695	1B	138.395
chr1B_629158750	chr1B	629158750	TraesCS1B01G398100-TraesCS1B01G398200	NA	correctChromosome	chr1B_673639695	1B	138.395
chr1B_673640536	chr1B	673640536	TraesCS1B01G459500	NA	correctChromosome	chr1B_673639695	1B	138.395
chr1B_679033110	chr1B	679033110	TraesCS1B01G470800	NA	correctChromosome	chr1B_673639695	1B	138.395
chr1B_673785971	chr1B	673785971	TraesCS1B01G459800	NA	correctChromosome	chr1B_673639695	1B	138.395
chr1B_673639695	chr1B	673639695	TraesCS1B01G459500	NA	correctChromosome	chr1B_673639695	1B	138.395
chr1B_679747493	chr1B	679747493	TraesCS1B01G471900	NA	correctChromosome	chr1B_673639695	1B	138.395
chr1B_679757636	chr1B	679757636	TraesCS1B01G472100	NA	correctChromosome	chr1B_673639695	1B	138.395
chr1B_629159139	chr1B	629159139	TraesCS1B01G398100-TraesCS1B01G398200	NA	correctChromosome	chr1B_673639695	1B	138.395
chr1B_673785832	chr1B	673785832	TraesCS1B01G459800	NA	correctChromosome	chr1B_673639695	1B	138.395
chr1B_673785444	chr1B	673785444	TraesCS1B01G459800	NA	correctChromosome	chr1B_673639695	1B	138.395
chr1B_673785829	chr1B	673785829	TraesCS1B01G459800	NA	correctChromosome	chr1B_673639695	1B	138.395
chr1B_628514341	chr1B	628514341	TraesCS1B01G396800	NA	correctChromosome	chr1B_673639695	1B	138.395
chr1B_677092899	chr1B	677092899	TraesCS1B01G467100	NA	correctChromosome	chr1B_673639695	1B	138.395
chr1B_676775482	chr1B	676775482	TraesCS1B01G466300	NA	correctChromosome	chr1B_673639695	1B	138.395
chr1B_673786009	chr1B	673786009	TraesCS1B01G459800	NA	correctChromosome	chr1B_673639695	1B	138.395
chr1B_676775542	chr1B	676775542	TraesCS1B01G466300	NA	correctChromosome	chr1B_673639695	1B	138.395
chr1B_628050059	chr1B	628050059	TraesCS1B01G396500	NA	correctChromosome	chr1B_673639695	1B	138.395
chr1B_629158754	chr1B	629158754	TraesCS1B01G398100-TraesCS1B01G398200	NA	correctChromosome	chr1B_673639695	1B	138.395
chr1B_676777440	chr1B	676777440	TraesCS1B01G466300	NA	correctChromosome	chr1B_673639695	1B	138.395
chr1B_628514432	chr1B	628514432	TraesCS1B01G396800	NA	correctChromosome	chr1B_673639695	1B	138.395
chr1B_677090910	chr1B	677090910	TraesCS1B01G467100	NA	correctChromosome	chr1B_673639695	1B	138.395
chr1B_676745887	chr1B	676745887	TraesCS1B01G466200	NA	correctChromosome	chr1B_676745887	1B	120.593
chr1B_673784725	chr1B	673784725	TraesCS1B01G459800	NA	correctChromosome	chr1B_676745887	1B	120.593
chr1B_688233114	chr1B	688233114	TraesCS1B01G480500	NA	correctChromosome	chr1B_686843854	1B	136.965
chr1B_686928437	chr1B	686928437	TraesCS1B01G478700	NA	correctChromosome	chr1B_686843854	1B	136.965
chr1B_683460488	chr1B	683460488	TraesCS1B01G474800	NA	correctChromosome	chr1B_686843854	1B	136.965
chr1B_688284912	chr1B	688284912	TraesCS1B01G480600	NA	correctChromosome	chr1B_686843854	1B	136.965
chr1B_686843854	chr1B	686843854	TraesCS1B01G478400	NA	correctChromosome	chr1B_686843854	1B	136.965
chr1B_686843799	chr1B	686843799	TraesCS1B01G478400	NA	correctChromosome	chr1B_686843854	1B	136.965
chr1B_680862694	chr1B	680862694	TraesCS1B01G472500	NA	correctChromosome	chr1B_686843854	1B	136.965
chr1B_686932290	chr1B	686932290	TraesCS1B01G478700	NA	correctChromosome	chr1B_686843854	1B	136.965
chr1B_687720400	chr1B	687720400	TraesCS1B01G480100	NA	correctChromosome	chr1B_686843854	1B	136.965
chr1B_687720416	chr1B	687720416	TraesCS1B01G480100	NA	correctChromosome	chr1B_686843854	1B	136.965
chr1B_686932240	chr1B	686932240	TraesCS1B01G478700	NA	correctChromosome	chr1B_686843854	1B	136.965
chr1B_687402129	chr1B	687402129	TraesCS1B01G479600	NA	correctChromosome	chr1B_686843854	1B	136.965
chr1B_8181619	chr1B	8181619	TraesCS1B01G016800	NA	correctChromosome	chr1B_8181512	1B	8.03434
chr1B_8181512	chr1B	8181512	TraesCS1B01G016800	NA	correctChromosome	chr1B_8181512	1B	8.03434
chr1B_8181707	chr1B	8181707	TraesCS1B01G016800	NA	correctChromosome	chr1B_8181707	1B	7.08927
chr1B_90944613	chr1B	90944613	TraesCS1B01G090300	NA	correctChromosome	chr1B_90944613	1B	18.2752
chr1B_9597562	chr1B	9597562	TraesCS1B01G020600	NA	correctChromosome	chr1B_9597562	1B	9.08778
chr1D_10380703	chr1D	10380703	TraesCS1D01G024700	NA	correctChromosome	chr1D_10380703	1D.1	16.9911
chr1D_10432903	chr1D	10432903	TraesCS1D01G025400	NA	correctChromosome	chr1D_10433530	1D.1	2.54644
chr1D_10432902	chr1D	10432902	TraesCS1D01G025400	NA	correctChromosome	chr1D_10433530	1D.1	2.54644
chr1D_10433530	chr1D	10433530	TraesCS1D01G025400	NA	correctChromosome	chr1D_10433530	1D.1	2.54644
chr1D_107218069	chr1D	107218069	TraesCS1D01G111900	NA	correctChromosome	chr1D_107218069	1D.1	31.2283
chr1D_94048112	chr1D	94048112	TraesCS1D01G104000-TraesCS1D01G104100	NA	correctChromosome	chr1D_107218069	1D.1	31.2283
chr1D_11879065	chr1D	11879065	TraesCS1D01G030500	NA	correctChromosome	chr1D_11878880	1D.1	17.7582
chr1D_11878880	chr1D	11878880	TraesCS1D01G030500	NA	correctChromosome	chr1D_11878880	1D.1	17.7582
chr1D_11781861	chr1D	11781861	TraesCS1D01G030300	NA	correctChromosome	chr1D_11878880	1D.1	17.7582
chr1D_11782990	chr1D	11782990	TraesCS1D01G030300	NA	correctChromosome	chr1D_11878880	1D.1	17.7582
chr1D_12309584	chr1D	12309584	TraesCS1D01G031400	NA	correctChromosome	chr1D_12309584	1D.1	18.4885
chr1D_269354136	chr1D	269354136	TraesCS1D01G192900	NA	correctChromosome	chr1D_132207096	1D.1	31.8709
chr1D_302390226	chr1D	302390226	TraesCS1D01G216700	NA	correctChromosome	chr1D_132207096	1D.1	31.8709
chr1D_134783985	chr1D	134783985	TraesCS1D01G125600-TraesCS1D01G125700	NA	correctChromosome	chr1D_132207096	1D.1	31.8709
chr1D_127216592	chr1D	127216592	TraesCS1D01G124100	NA	correctChromosome	chr1D_132207096	1D.1	31.8709
chr1D_277094135	chr1D	277094135	TraesCS1D01G196900	NA	correctChromosome	chr1D_132207096	1D.1	31.8709
chr1D_143119876	chr1D	143119876	TraesCS1D01G129300	NA	correctChromosome	chr1D_132207096	1D.1	31.8709
chr1D_263862702	chr1D	263862702	TraesCS1D01G191100-TraesCS1D01G191200	NA	correctChromosome	chr1D_132207096	1D.1	31.8709
chr1D_132207096	chr1D	132207096	TraesCS1D01G125100	NA	correctChromosome	chr1D_132207096	1D.1	31.8709
chr1D_16380921	chr1D	16380921	TraesCS1D01G035300	NA	correctChromosome	chr1D_16380640	1D.1	23.1263
chr1D_16380640	chr1D	16380640	TraesCS1D01G035300	NA	correctChromosome	chr1D_16380640	1D.1	23.1263
chr1D_16381053	chr1D	16381053	TraesCS1D01G035300	NA	correctChromosome	chr1D_16380640	1D.1	23.1263
chr1D_16788447	chr1D	16788447	TraesCS1D01G036000	NA	correctChromosome	chr1D_16788447	1D.1	20.2268
chr1D_17237591	chr1D	17237591	TraesCS1D01G036900	NA	correctChromosome	chr1D_17237591	1D.1	20.7215
chr1D_20569027	chr1D	20569027	TraesCS1D01G042100	NA	correctChromosome	chr1D_20569027	1D.1	24.9603
chr1D_211304185	chr1D	211304185	TraesCS1D01G151500	NA	correctChromosome	chr1D_219727242	1D.1	44.0185
chr1D_219727242	chr1D	219727242	TraesCS1D01G156000	NA	correctChromosome	chr1D_219727242	1D.1	44.0185
chr1D_217147079	chr1D	217147079	TraesCS1D01G155100	NA	correctChromosome	chr1D_219727242	1D.1	44.0185
chr1D_304337257	chr1D	304337257	TraesCS1D01G218100	NA	correctChromosome	chr1D_304337257	1D.1	56.1162
chr1D_334226076	chr1D	334226076	TraesCS1D01G243700	NA	correctChromosome	chr1D_326908190	1D.1	56.5295
chr1D_337903007	chr1D	337903007	TraesCS1D01G245900	NA	correctChromosome	chr1D_326908190	1D.1	56.5295
chr1D_335266840	chr1D	335266840	TraesCS1D01G244400	NA	correctChromosome	chr1D_326908190	1D.1	56.5295
chr1D_326908190	chr1D	326908190	TraesCS1D01G237500	NA	correctChromosome	chr1D_326908190	1D.1	56.5295
chr1D_337899075	chr1D	337899075	TraesCS1D01G245800	NA	correctChromosome	chr1D_326908190	1D.1	56.5295
chr1D_338874030	chr1D	338874030	TraesCS1D01G246200	NA	correctChromosome	chr1D_326908190	1D.1	56.5295
chr1D_330091790	chr1D	330091790	TraesCS1D01G240300	NA	correctChromosome	chr1D_326908190	1D.1	56.5295
chr1D_335075883	chr1D	335075883	TraesCS1D01G244300	NA	correctChromosome	chr1D_335075883	1D.1	57.0376
chr1D_34940622	chr1D	34940622	TraesCS1D01G053700	NA	correctChromosome	chr1D_34940622	1D.1	26.1079
chr1D_33473101	chr1D	33473101	TraesCS1D01G052200	NA	correctChromosome	chr1D_34940622	1D.1	26.1079
chr1D_38781446	chr1D	38781446	TraesCS1D01G058900	NA	correctChromosome	chr1D_34940622	1D.1	26.1079
chr1D_34011022	chr1D	34011022	TraesCS1D01G053100-TraesCS1D01G053200	NA	correctChromosome	chr1D_34940622	1D.1	26.1079
chr1D_34945067	chr1D	34945067	TraesCS1D01G053800	NA	correctChromosome	chr1D_34940622	1D.1	26.1079
chr1D_38780285	chr1D	38780285	TraesCS1D01G058900	NA	correctChromosome	chr1D_34940622	1D.1	26.1079
chr1D_34943052	chr1D	34943052	TraesCS1D01G053700	NA	correctChromosome	chr1D_34940622	1D.1	26.1079
chr1D_38869272	chr1D	38869272	TraesCS1D01G058900-TraesCS1D01G059000	NA	correctChromosome	chr1D_34940622	1D.1	26.1079
chr1D_34010864	chr1D	34010864	TraesCS1D01G053100-TraesCS1D01G053200	NA	correctChromosome	chr1D_34940622	1D.1	26.1079
chr1D_34942578	chr1D	34942578	TraesCS1D01G053700	NA	correctChromosome	chr1D_34940622	1D.1	26.1079
chr1D_38867291	chr1D	38867291	TraesCS1D01G058900-TraesCS1D01G059000	NA	correctChromosome	chr1D_34940622	1D.1	26.1079
chr1D_34010737	chr1D	34010737	TraesCS1D01G053100-TraesCS1D01G053200	NA	correctChromosome	chr1D_34940622	1D.1	26.1079
chr1D_34942729	chr1D	34942729	TraesCS1D01G053700	NA	correctChromosome	chr1D_34940622	1D.1	26.1079
chr1D_33473079	chr1D	33473079	TraesCS1D01G052200	NA	correctChromosome	chr1D_34940622	1D.1	26.1079
chr1D_356870140	chr1D	356870140	TraesCS1D01G262600	NA	correctChromosome	chr1D_351440063	1D.1	61.4921
chr1D_351440063	chr1D	351440063	TraesCS1D01G259000	NA	correctChromosome	chr1D_351440063	1D.1	61.4921
chr1D_349183961	chr1D	349183961	TraesCS1D01G256600	NA	correctChromosome	chr1D_351440063	1D.1	61.4921
chr1D_345704995	chr1D	345704995	TraesCS1D01G253700	NA	correctChromosome	chr1D_351440063	1D.1	61.4921
chr1D_368337632	chr1D	368337632	TraesCS1D01G274000-TraesCS1D01G274100	NA	correctChromosome	chr1D_367429041	1D.1	65.5357
chr1D_367429041	chr1D	367429041	TraesCS1D01G273200	NA	correctChromosome	chr1D_367429041	1D.1	65.5357
chr1D_370214363	chr1D	370214363	TraesCS1D01G274600	NA	correctChromosome	chr1D_367429041	1D.1	65.5357
chr1D_38780319	chr1D	38780319	TraesCS1D01G058900	NA	correctChromosome	chr1D_38549524	1D.1	27.5826
chr1D_38781582	chr1D	38781582	TraesCS1D01G058900	NA	correctChromosome	chr1D_38549524	1D.1	27.5826
chr1D_37526969	chr1D	37526969	TraesCS1D01G057100	NA	correctChromosome	chr1D_38549524	1D.1	27.5826
chr1D_38786481	chr1D	38786481	TraesCS1D01G058900	NA	correctChromosome	chr1D_38549524	1D.1	27.5826
chr1D_40168427	chr1D	40168427	TraesCS1D01G060000	NA	correctChromosome	chr1D_38549524	1D.1	27.5826
chr1D_38549524	chr1D	38549524	TraesCS1D01G058300	NA	correctChromosome	chr1D_38549524	1D.1	27.5826
chr1D_35650393	chr1D	35650393	TraesCS1D01G054200	NA	correctChromosome	chr1D_38549524	1D.1	27.5826
chr1D_38781042	chr1D	38781042	TraesCS1D01G058900	NA	correctChromosome	chr1D_38549524	1D.1	27.5826
chr1D_38786473	chr1D	38786473	TraesCS1D01G058900	NA	correctChromosome	chr1D_38549524	1D.1	27.5826
chr1D_40166498	chr1D	40166498	TraesCS1D01G060000	NA	correctChromosome	chr1D_38549524	1D.1	27.5826
chr1D_39291806	chr1D	39291806	TraesCS1D01G059200	NA	correctChromosome	chr1D_38549524	1D.1	27.5826
chr1D_38780888	chr1D	38780888	TraesCS1D01G058900	NA	correctChromosome	chr1D_38549524	1D.1	27.5826
chr1D_37526977	chr1D	37526977	TraesCS1D01G057100	NA	correctChromosome	chr1D_38549524	1D.1	27.5826
chr1D_38789195	chr1D	38789195	TraesCS1D01G058900	NA	correctChromosome	chr1D_38549524	1D.1	27.5826
chr1D_38781426	chr1D	38781426	TraesCS1D01G058900	NA	correctChromosome	chr1D_38549524	1D.1	27.5826
chr1D_40168004	chr1D	40168004	TraesCS1D01G060000	NA	correctChromosome	chr1D_38549524	1D.1	27.5826
chr1D_37527037	chr1D	37527037	TraesCS1D01G057100	NA	correctChromosome	chr1D_38549524	1D.1	27.5826
chr1D_38550592	chr1D	38550592	TraesCS1D01G058300	NA	correctChromosome	chr1D_38549524	1D.1	27.5826
chr1D_38788498	chr1D	38788498	TraesCS1D01G058900	NA	correctChromosome	chr1D_38549524	1D.1	27.5826
chr1D_38787006	chr1D	38787006	TraesCS1D01G058900	NA	correctChromosome	chr1D_38549524	1D.1	27.5826
chr1D_38786690	chr1D	38786690	TraesCS1D01G058900	NA	correctChromosome	chr1D_38549524	1D.1	27.5826
chr1D_34947132	chr1D	34947132	TraesCS1D01G053800	NA	correctChromosome	chr1D_38549524	1D.1	27.5826
chr1D_38781555	chr1D	38781555	TraesCS1D01G058900	NA	correctChromosome	chr1D_38549524	1D.1	27.5826
chr1D_38867310	chr1D	38867310	TraesCS1D01G058900-TraesCS1D01G059000	NA	correctChromosome	chr1D_38549524	1D.1	27.5826
chr1D_35640111	chr1D	35640111	TraesCS1D01G054100	NA	correctChromosome	chr1D_38549524	1D.1	27.5826
chr1D_38788934	chr1D	38788934	TraesCS1D01G058900	NA	correctChromosome	chr1D_38549524	1D.1	27.5826
chr1D_38787614	chr1D	38787614	TraesCS1D01G058900	NA	correctChromosome	chr1D_38549524	1D.1	27.5826
chr1D_38788479	chr1D	38788479	TraesCS1D01G058900	NA	correctChromosome	chr1D_38549524	1D.1	27.5826
chr1D_35640403	chr1D	35640403	TraesCS1D01G054100	NA	correctChromosome	chr1D_38549524	1D.1	27.5826
chr1D_39291623	chr1D	39291623	TraesCS1D01G059200	NA	correctChromosome	chr1D_38549524	1D.1	27.5826
chr1D_38780887	chr1D	38780887	TraesCS1D01G058900	NA	correctChromosome	chr1D_38549524	1D.1	27.5826
chr1D_37527222	chr1D	37527222	TraesCS1D01G057100	NA	correctChromosome	chr1D_38549524	1D.1	27.5826
chr1D_38869661	chr1D	38869661	TraesCS1D01G058900-TraesCS1D01G059000	NA	correctChromosome	chr1D_38549524	1D.1	27.5826
chr1D_38787678	chr1D	38787678	TraesCS1D01G058900	NA	correctChromosome	chr1D_38549524	1D.1	27.5826
chr1D_35649801	chr1D	35649801	TraesCS1D01G054200	NA	correctChromosome	chr1D_38549524	1D.1	27.5826
chr1D_35649653	chr1D	35649653	TraesCS1D01G054200	NA	correctChromosome	chr1D_38549524	1D.1	27.5826
chr1D_38788001	chr1D	38788001	TraesCS1D01G058900	NA	correctChromosome	chr1D_38549524	1D.1	27.5826
chr1D_38788092	chr1D	38788092	TraesCS1D01G058900	NA	correctChromosome	chr1D_38549524	1D.1	27.5826
chr1D_38788037	chr1D	38788037	TraesCS1D01G058900	NA	correctChromosome	chr1D_38549524	1D.1	27.5826
chr1D_38787954	chr1D	38787954	TraesCS1D01G058900	NA	correctChromosome	chr1D_38549524	1D.1	27.5826
chr1D_386123843	chr1D	386123843	TraesCS1D01G287600	NA	correctChromosome	chr1D_386950097	1D.1	72.2804
chr1D_386950097	chr1D	386950097	TraesCS1D01G288700	NA	correctChromosome	chr1D_386950097	1D.1	72.2804
chr1D_38788532	chr1D	38788532	TraesCS1D01G058900	NA	correctChromosome	chr1D_38788532	1D.1	27.9864
chr1D_427482353	chr1D	427482353	TraesCS1D01G338100	NA	correctChromosome	chr1D_431958253	1D.1	73.361
chr1D_431958253	chr1D	431958253	TraesCS1D01G342200	NA	correctChromosome	chr1D_431958253	1D.1	73.361
chr1D_432796411	chr1D	432796411	TraesCS1D01G344100	NA	correctChromosome	chr1D_433212657	1D.1	78.9774
chr1D_433212657	chr1D	433212657	TraesCS1D01G344600	NA	correctChromosome	chr1D_433212657	1D.1	78.9774
chr1D_433213048	chr1D	433213048	TraesCS1D01G344600	NA	correctChromosome	chr1D_433212657	1D.1	78.9774
chr1D_433213049	chr1D	433213049	TraesCS1D01G344600	NA	correctChromosome	chr1D_433212657	1D.1	78.9774
chr1D_432708228	chr1D	432708228	TraesCS1D01G343800	NA	correctChromosome	chr1D_433212657	1D.1	78.9774
chr1D_432794518	chr1D	432794518	TraesCS1D01G344000	NA	correctChromosome	chr1D_433212657	1D.1	78.9774
chr1D_432792118	chr1D	432792118	TraesCS1D01G344000	NA	correctChromosome	chr1D_433212657	1D.1	78.9774
chr1D_433212969	chr1D	433212969	TraesCS1D01G344600	NA	correctChromosome	chr1D_433212657	1D.1	78.9774
chr1D_433213085	chr1D	433213085	TraesCS1D01G344600	NA	correctChromosome	chr1D_433212657	1D.1	78.9774
chr1D_432795777	chr1D	432795777	TraesCS1D01G344000	NA	correctChromosome	chr1D_433212657	1D.1	78.9774
chr1D_432793376	chr1D	432793376	TraesCS1D01G344000	NA	correctChromosome	chr1D_433212657	1D.1	78.9774
chr1D_433511784	chr1D	433511784	TraesCS1D01G345500	NA	correctChromosome	chr1D_433511861	1D.1	99.201
chr1D_436097527	chr1D	436097527	TraesCS1D01G350200	NA	correctChromosome	chr1D_433511861	1D.1	99.201
chr1D_433512727	chr1D	433512727	TraesCS1D01G345600	NA	correctChromosome	chr1D_433511861	1D.1	99.201
chr1D_433511861	chr1D	433511861	TraesCS1D01G345500	NA	correctChromosome	chr1D_433511861	1D.1	99.201
chr1D_433911532	chr1D	433911532	TraesCS1D01G346200	NA	correctChromosome	chr1D_435277806	1D.1	100.027
chr1D_433911527	chr1D	433911527	TraesCS1D01G346200	NA	correctChromosome	chr1D_435277806	1D.1	100.027
chr1D_433905045	chr1D	433905045	TraesCS1D01G346100	NA	correctChromosome	chr1D_435277806	1D.1	100.027
chr1D_433916553	chr1D	433916553	TraesCS1D01G346200	NA	correctChromosome	chr1D_435277806	1D.1	100.027
chr1D_435748770	chr1D	435748770	TraesCS1D01G349400	NA	correctChromosome	chr1D_435277806	1D.1	100.027
chr1D_435277806	chr1D	435277806	TraesCS1D01G348500	NA	correctChromosome	chr1D_435277806	1D.1	100.027
chr1D_435277748	chr1D	435277748	TraesCS1D01G348500	NA	correctChromosome	chr1D_435277806	1D.1	100.027
chr1D_435802037	chr1D	435802037	TraesCS1D01G349700	NA	correctChromosome	chr1D_435277806	1D.1	100.027
chr1D_433899405	chr1D	433899405	TraesCS1D01G346100	NA	correctChromosome	chr1D_435277806	1D.1	100.027
chr1D_433903981	chr1D	433903981	TraesCS1D01G346100	NA	correctChromosome	chr1D_435277806	1D.1	100.027
chr1D_476437383	chr1D	476437383	TraesCS1D01G419400	NA	correctChromosome	chr1D_475194144	1D.2	0
chr1D_475724570	chr1D	475724570	TraesCS1D01G417600	NA	correctChromosome	chr1D_475194144	1D.2	0
chr1D_473961245	chr1D	473961245	TraesCS1D01G413000	NA	correctChromosome	chr1D_475194144	1D.2	0
chr1D_475925975	chr1D	475925975	TraesCS1D01G418700	NA	correctChromosome	chr1D_475194144	1D.2	0
chr1D_475726642	chr1D	475726642	TraesCS1D01G417600	NA	correctChromosome	chr1D_475194144	1D.2	0
chr1D_475606089	chr1D	475606089	TraesCS1D01G417300	NA	correctChromosome	chr1D_475194144	1D.2	0
chr1D_475731412	chr1D	475731412	TraesCS1D01G417600	NA	correctChromosome	chr1D_475194144	1D.2	0
chr1D_475502691	chr1D	475502691	TraesCS1D01G417000	NA	correctChromosome	chr1D_475194144	1D.2	0
chr1D_475730484	chr1D	475730484	TraesCS1D01G417600	NA	correctChromosome	chr1D_475194144	1D.2	0
chr1D_476904778	chr1D	476904778	TraesCS1D01G420500	NA	correctChromosome	chr1D_475194144	1D.2	0
chr1D_475730687	chr1D	475730687	TraesCS1D01G417600	NA	correctChromosome	chr1D_475194144	1D.2	0
chr1D_473997209	chr1D	473997209	TraesCS1D01G413400	NA	correctChromosome	chr1D_475194144	1D.2	0
chr1D_475817427	chr1D	475817427	TraesCS1D01G417900	NA	correctChromosome	chr1D_475194144	1D.2	0
chr1D_475197469	chr1D	475197469	TraesCS1D01G416200	NA	correctChromosome	chr1D_475194144	1D.2	0
chr1D_475730689	chr1D	475730689	TraesCS1D01G417600	NA	correctChromosome	chr1D_475194144	1D.2	0
chr1D_473873217	chr1D	473873217	TraesCS1D01G412800	NA	correctChromosome	chr1D_475194144	1D.2	0
chr1D_473992229	chr1D	473992229	TraesCS1D01G413300	NA	correctChromosome	chr1D_475194144	1D.2	0
chr1D_476583866	chr1D	476583866	TraesCS1D01G419800	NA	correctChromosome	chr1D_475194144	1D.2	0
chr1D_475519293	chr1D	475519293	TraesCS1D01G417100	NA	correctChromosome	chr1D_475194144	1D.2	0
chr1D_475731348	chr1D	475731348	TraesCS1D01G417600	NA	correctChromosome	chr1D_475194144	1D.2	0
chr1D_475723354	chr1D	475723354	TraesCS1D01G417500	NA	correctChromosome	chr1D_475194144	1D.2	0
chr1D_475924190	chr1D	475924190	TraesCS1D01G418500	NA	correctChromosome	chr1D_475194144	1D.2	0
chr1D_477185505	chr1D	477185505	TraesCS1D01G420900	NA	correctChromosome	chr1D_475194144	1D.2	0
chr1D_477185603	chr1D	477185603	TraesCS1D01G420900	NA	correctChromosome	chr1D_475194144	1D.2	0
chr1D_475502699	chr1D	475502699	TraesCS1D01G417000	NA	correctChromosome	chr1D_475194144	1D.2	0
chr1D_473961998	chr1D	473961998	TraesCS1D01G413100	NA	correctChromosome	chr1D_475194144	1D.2	0
chr1D_475197236	chr1D	475197236	TraesCS1D01G416200	NA	correctChromosome	chr1D_475194144	1D.2	0
chr1D_473998165	chr1D	473998165	TraesCS1D01G413400	NA	correctChromosome	chr1D_475194144	1D.2	0
chr1D_473987368	chr1D	473987368	TraesCS1D01G413200	NA	correctChromosome	chr1D_475194144	1D.2	0
chr1D_476440348	chr1D	476440348	TraesCS1D01G419400	NA	correctChromosome	chr1D_475194144	1D.2	0
chr1D_475731441	chr1D	475731441	TraesCS1D01G417600	NA	correctChromosome	chr1D_475194144	1D.2	0
chr1D_475728564	chr1D	475728564	TraesCS1D01G417600	NA	correctChromosome	chr1D_475194144	1D.2	0
chr1D_475604660	chr1D	475604660	TraesCS1D01G417300	NA	correctChromosome	chr1D_475194144	1D.2	0
chr1D_475730483	chr1D	475730483	TraesCS1D01G417600	NA	correctChromosome	chr1D_475194144	1D.2	0
chr1D_476442984	chr1D	476442984	TraesCS1D01G419400	NA	correctChromosome	chr1D_475194144	1D.2	0
chr1D_475503706	chr1D	475503706	TraesCS1D01G417000	NA	correctChromosome	chr1D_475194144	1D.2	0
chr1D_475194144	chr1D	475194144	TraesCS1D01G416200	NA	correctChromosome	chr1D_475194144	1D.2	0
chr1D_475606364	chr1D	475606364	TraesCS1D01G417300	NA	correctChromosome	chr1D_475194144	1D.2	0
chr1D_473988142	chr1D	473988142	TraesCS1D01G413300	NA	correctChromosome	chr1D_475194144	1D.2	0
chr1D_476438284	chr1D	476438284	TraesCS1D01G419400	NA	correctChromosome	chr1D_475194144	1D.2	0
chr1D_474056864	chr1D	474056864	TraesCS1D01G413700	NA	correctChromosome	chr1D_475194144	1D.2	0
chr1D_473987408	chr1D	473987408	TraesCS1D01G413200	NA	correctChromosome	chr1D_475194144	1D.2	0
chr1D_475193652	chr1D	475193652	TraesCS1D01G416200	NA	correctChromosome	chr1D_475194144	1D.2	0
chr1D_477185584	chr1D	477185584	TraesCS1D01G420900	NA	correctChromosome	chr1D_475194144	1D.2	0
chr1D_476904766	chr1D	476904766	TraesCS1D01G420500	NA	correctChromosome	chr1D_475194144	1D.2	0
chr1D_475926055	chr1D	475926055	TraesCS1D01G418700	NA	correctChromosome	chr1D_475194144	1D.2	0
chr1D_473988245	chr1D	473988245	TraesCS1D01G413300	NA	correctChromosome	chr1D_475194144	1D.2	0
chr1D_475605729	chr1D	475605729	TraesCS1D01G417300	NA	correctChromosome	chr1D_475194144	1D.2	0
chr1D_476440122	chr1D	476440122	TraesCS1D01G419400	NA	correctChromosome	chr1D_475194144	1D.2	0
chr1D_473988078	chr1D	473988078	TraesCS1D01G413300	NA	correctChromosome	chr1D_475194144	1D.2	0
chr1D_475605708	chr1D	475605708	TraesCS1D01G417300	NA	correctChromosome	chr1D_475605708	1D.2	0.64919
chr1D_477213296	chr1D	477213296	TraesCS1D01G421100	NA	correctChromosome	chr1D_477213296	1D.2	1.2853
chr1D_479594351	chr1D	479594351	TraesCS1D01G426400	NA	correctChromosome	chr1D_479594351	1D.2	4.4079
chr1D_486015106	chr1D	486015106	TraesCS1D01G440500	NA	correctChromosome	chr1D_485104839	1D.2	10.9652
chr1D_493487470	chr1D	493487470	TraesCS1D01G451200	NA	correctChromosome	chr1D_485104839	1D.2	10.9652
chr1D_493765032	chr1D	493765032	TraesCS1D01G451900	NA	correctChromosome	chr1D_485104839	1D.2	10.9652
chr1D_490599036	chr1D	490599036	TraesCS1D01G448300	NA	correctChromosome	chr1D_485104839	1D.2	10.9652
chr1D_486014160	chr1D	486014160	TraesCS1D01G440500	NA	correctChromosome	chr1D_485104839	1D.2	10.9652
chr1D_484390517	chr1D	484390517	TraesCS1D01G436800	NA	correctChromosome	chr1D_485104839	1D.2	10.9652
chr1D_490926744	chr1D	490926744	TraesCS1D01G448600	NA	correctChromosome	chr1D_485104839	1D.2	10.9652
chr1D_487168829	chr1D	487168829	TraesCS1D01G443000	NA	correctChromosome	chr1D_485104839	1D.2	10.9652
chr1D_484395903	chr1D	484395903	TraesCS1D01G436800	NA	correctChromosome	chr1D_485104839	1D.2	10.9652
chr1D_492612794	chr1D	492612794	TraesCS1D01G450200	NA	correctChromosome	chr1D_485104839	1D.2	10.9652
chr1D_493487452	chr1D	493487452	TraesCS1D01G451200	NA	correctChromosome	chr1D_485104839	1D.2	10.9652
chr1D_492611715	chr1D	492611715	TraesCS1D01G450200	NA	correctChromosome	chr1D_485104839	1D.2	10.9652
chr1D_491030180	chr1D	491030180	TraesCS1D01G448700	NA	correctChromosome	chr1D_485104839	1D.2	10.9652
chr1D_484390540	chr1D	484390540	TraesCS1D01G436800	NA	correctChromosome	chr1D_485104839	1D.2	10.9652
chr1D_494469311	chr1D	494469311	TraesCS1D01G453600	NA	correctChromosome	chr1D_485104839	1D.2	10.9652
chr1D_492641722	chr1D	492641722	TraesCS1D01G450300	NA	correctChromosome	chr1D_485104839	1D.2	10.9652
chr1D_487169251	chr1D	487169251	TraesCS1D01G443000	NA	correctChromosome	chr1D_485104839	1D.2	10.9652
chr1D_492613262	chr1D	492613262	TraesCS1D01G450200	NA	correctChromosome	chr1D_485104839	1D.2	10.9652
chr1D_487951122	chr1D	487951122	TraesCS1D01G445200	NA	correctChromosome	chr1D_485104839	1D.2	10.9652
chr1D_492646322	chr1D	492646322	TraesCS1D01G450400	NA	correctChromosome	chr1D_485104839	1D.2	10.9652
chr1D_487953170	chr1D	487953170	TraesCS1D01G445200	NA	correctChromosome	chr1D_485104839	1D.2	10.9652
chr1D_491049923	chr1D	491049923	TraesCS1D01G449000	NA	correctChromosome	chr1D_485104839	1D.2	10.9652
chr1D_491050198	chr1D	491050198	TraesCS1D01G449000	NA	correctChromosome	chr1D_485104839	1D.2	10.9652
chr1D_493605277	chr1D	493605277	TraesCS1D01G451300	NA	correctChromosome	chr1D_485104839	1D.2	10.9652
chr1D_485104839	chr1D	485104839	TraesCS1D01G437900	NA	correctChromosome	chr1D_485104839	1D.2	10.9652
chr1D_484390661	chr1D	484390661	TraesCS1D01G436800	NA	correctChromosome	chr1D_485104839	1D.2	10.9652
chr1D_487956662	chr1D	487956662	TraesCS1D01G445300	NA	correctChromosome	chr1D_485104839	1D.2	10.9652
chr1D_492646643	chr1D	492646643	TraesCS1D01G450400	NA	correctChromosome	chr1D_485104839	1D.2	10.9652
chr1D_491039171	chr1D	491039171	TraesCS1D01G448700	NA	correctChromosome	chr1D_485104839	1D.2	10.9652
chr1D_485056244	chr1D	485056244	TraesCS1D01G437700	NA	correctChromosome	chr1D_485104839	1D.2	10.9652
chr1D_487168968	chr1D	487168968	TraesCS1D01G443000	NA	correctChromosome	chr1D_485104839	1D.2	10.9652
chr1D_487168883	chr1D	487168883	TraesCS1D01G443000	NA	correctChromosome	chr1D_485104839	1D.2	10.9652
chr1D_494147593	chr1D	494147593	TraesCS1D01G453100	NA	correctChromosome	chr1D_485104839	1D.2	10.9652
chr1D_491795548	chr1D	491795548	TraesCS1D01G449600	NA	correctChromosome	chr1D_485104839	1D.2	10.9652
chr1D_491633692	chr1D	491633692	TraesCS1D01G449200	NA	correctChromosome	chr1D_485104839	1D.2	10.9652
chr1D_485506377	chr1D	485506377	TraesCS1D01G438900	NA	correctChromosome	chr1D_485104839	1D.2	10.9652
chr1A_589054966	chr1A	589054966	TraesCS1A01G439800	NA	wrongChromosome	chr1D_485104839	1D.2	10.9652
chr1D_492646712	chr1D	492646712	TraesCS1D01G450400	NA	correctChromosome	chr1D_485104839	1D.2	10.9652
chr1D_491034498	chr1D	491034498	TraesCS1D01G448700	NA	correctChromosome	chr1D_485104839	1D.2	10.9652
chr1A_589055484	chr1A	589055484	TraesCS1A01G439800	NA	wrongChromosome	chr1D_485104839	1D.2	10.9652
chr1D_491633691	chr1D	491633691	TraesCS1D01G449200	NA	correctChromosome	chr1D_485104839	1D.2	10.9652
chr1D_491049397	chr1D	491049397	TraesCS1D01G449000	NA	correctChromosome	chr1D_485104839	1D.2	10.9652
chr1D_491051367	chr1D	491051367	TraesCS1D01G449000	NA	correctChromosome	chr1D_485104839	1D.2	10.9652
chr1D_491041692	chr1D	491041692	TraesCS1D01G448900	NA	correctChromosome	chr1D_485104839	1D.2	10.9652
chr1D_491044879	chr1D	491044879	TraesCS1D01G448900	NA	correctChromosome	chr1D_485104839	1D.2	10.9652
chr1D_485506597	chr1D	485506597	TraesCS1D01G438900	NA	correctChromosome	chr1D_485104839	1D.2	10.9652
chr1D_492611112	chr1D	492611112	TraesCS1D01G450200	NA	correctChromosome	chr1D_485104839	1D.2	10.9652
chr1D_491045084	chr1D	491045084	TraesCS1D01G449000	NA	correctChromosome	chr1D_485104839	1D.2	10.9652
chr1D_488575675	chr1D	488575675	TraesCS1D01G445700	NA	correctChromosome	chr1D_485104839	1D.2	10.9652
chr1D_491633937	chr1D	491633937	TraesCS1D01G449200	NA	correctChromosome	chr1D_485104839	1D.2	10.9652
chr1A_589055371	chr1A	589055371	TraesCS1A01G439800	NA	wrongChromosome	chr1D_485104839	1D.2	10.9652
chr1D_494146727	chr1D	494146727	TraesCS1D01G453100	NA	correctChromosome	chr1D_485104839	1D.2	10.9652
chr1A_589055372	chr1A	589055372	TraesCS1A01G439800	NA	wrongChromosome	chr1D_485104839	1D.2	10.9652
chr1D_491041416	chr1D	491041416	TraesCS1D01G448800	NA	correctChromosome	chr1D_485104839	1D.2	10.9652
chr1B_683482738	chr1B	683482738	TraesCS1B01G475100	NA	wrongChromosome	chr1D_485104839	1D.2	10.9652
chr1D_492534009	chr1D	492534009	TraesCS1D01G450100	NA	correctChromosome	chr1D_485104839	1D.2	10.9652
chr1D_492646694	chr1D	492646694	TraesCS1D01G450400	NA	correctChromosome	chr1D_485104839	1D.2	10.9652
chr1D_488574362	chr1D	488574362	TraesCS1D01G445700	NA	correctChromosome	chr1D_485104839	1D.2	10.9652
chr1D_485113705	chr1D	485113705	TraesCS1D01G438000	NA	correctChromosome	chr1D_485104839	1D.2	10.9652
chr1D_491049750	chr1D	491049750	TraesCS1D01G449000	NA	correctChromosome	chr1D_485104839	1D.2	10.9652
chr1D_491043140	chr1D	491043140	TraesCS1D01G448900	NA	correctChromosome	chr1D_485104839	1D.2	10.9652
chr1D_492648834	chr1D	492648834	TraesCS1D01G450400	NA	correctChromosome	chr1D_485104839	1D.2	10.9652
chr1D_491051285	chr1D	491051285	TraesCS1D01G449000	NA	correctChromosome	chr1D_485104839	1D.2	10.9652
chr1D_487171886	chr1D	487171886	TraesCS1D01G443000	NA	correctChromosome	chr1D_485104839	1D.2	10.9652
chr1D_491045112	chr1D	491045112	TraesCS1D01G449000	NA	correctChromosome	chr1D_485104839	1D.2	10.9652
chr1D_488575666	chr1D	488575666	TraesCS1D01G445700	NA	correctChromosome	chr1D_485104839	1D.2	10.9652
chr1D_485105818	chr1D	485105818	TraesCS1D01G438000	NA	correctChromosome	chr1D_485104839	1D.2	10.9652
chr1D_487177030	chr1D	487177030	TraesCS1D01G443100	NA	correctChromosome	chr1D_485104839	1D.2	10.9652
chr1D_487566461	chr1D	487566461	TraesCS1D01G444100	NA	correctChromosome	chr1D_485104839	1D.2	10.9652
chr1A_589055507	chr1A	589055507	TraesCS1A01G439800	NA	wrongChromosome	chr1D_485104839	1D.2	10.9652
chr1D_488576896	chr1D	488576896	TraesCS1D01G445700	NA	correctChromosome	chr1D_485104839	1D.2	10.9652
chr1B_683482747	chr1B	683482747	TraesCS1B01G475100	NA	wrongChromosome	chr1D_485104839	1D.2	10.9652
chr1D_489091744	chr1D	489091744	TraesCS1D01G446500	NA	correctChromosome	chr1D_485104839	1D.2	10.9652
chr1D_491795818	chr1D	491795818	TraesCS1D01G449600	NA	correctChromosome	chr1D_491795818	1D.2	9.24286
chr1D_491032916	chr1D	491032916	TraesCS1D01G448700	NA	correctChromosome	chr1D_493605325	1D.2	7.99679
chr1D_492533972	chr1D	492533972	TraesCS1D01G450100	NA	correctChromosome	chr1D_493605325	1D.2	7.99679
chr1D_491634352	chr1D	491634352	TraesCS1D01G449200	NA	correctChromosome	chr1D_493605325	1D.2	7.99679
chr1D_487957529	chr1D	487957529	TraesCS1D01G445300	NA	correctChromosome	chr1D_493605325	1D.2	7.99679
chr1A_589056276	chr1A	589056276	TraesCS1A01G439800	NA	wrongChromosome	chr1D_493605325	1D.2	7.99679
chr1D_485557679	chr1D	485557679	TraesCS1D01G439600	NA	correctChromosome	chr1D_493605325	1D.2	7.99679
chr1D_492646655	chr1D	492646655	TraesCS1D01G450400	NA	correctChromosome	chr1D_493605325	1D.2	7.99679
chr1D_493486802	chr1D	493486802	TraesCS1D01G451200	NA	correctChromosome	chr1D_493605325	1D.2	7.99679
chr1D_492613994	chr1D	492613994	TraesCS1D01G450200	NA	correctChromosome	chr1D_493605325	1D.2	7.99679
chr1D_486155509	chr1D	486155509	TraesCS1D01G440900	NA	correctChromosome	chr1D_493605325	1D.2	7.99679
chr1D_492610021	chr1D	492610021	TraesCS1D01G450200	NA	correctChromosome	chr1D_493605325	1D.2	7.99679
chr1D_493605325	chr1D	493605325	TraesCS1D01G451300	NA	correctChromosome	chr1D_493605325	1D.2	7.99679
chr1D_491050131	chr1D	491050131	TraesCS1D01G449000	NA	correctChromosome	chr1D_493605325	1D.2	7.99679
chr1D_487956613	chr1D	487956613	TraesCS1D01G445300	NA	correctChromosome	chr1D_493605325	1D.2	7.99679
chr1D_488577473	chr1D	488577473	TraesCS1D01G445700	NA	correctChromosome	chr1D_493605325	1D.2	7.99679
chr1D_487567666	chr1D	487567666	TraesCS1D01G444100	NA	correctChromosome	chr1D_493605325	1D.2	7.99679
chr1D_491050132	chr1D	491050132	TraesCS1D01G449000	NA	correctChromosome	chr1D_493605325	1D.2	7.99679
chr1D_484390604	chr1D	484390604	TraesCS1D01G436800	NA	correctChromosome	chr1D_493605325	1D.2	7.99679
chr1D_492646390	chr1D	492646390	TraesCS1D01G450400	NA	correctChromosome	chr1D_493605325	1D.2	7.99679
chr1D_492646462	chr1D	492646462	TraesCS1D01G450400	NA	correctChromosome	chr1D_493605325	1D.2	7.99679
chr1D_487169133	chr1D	487169133	TraesCS1D01G443000	NA	correctChromosome	chr1D_493605325	1D.2	7.99679
chr1D_486155872	chr1D	486155872	TraesCS1D01G440900	NA	correctChromosome	chr1D_493605325	1D.2	7.99679
chr1D_485106032	chr1D	485106032	TraesCS1D01G438000	NA	correctChromosome	chr1D_493605325	1D.2	7.99679
chr1D_486155870	chr1D	486155870	TraesCS1D01G440900	NA	correctChromosome	chr1D_493605325	1D.2	7.99679
chr1D_488576899	chr1D	488576899	TraesCS1D01G445700	NA	correctChromosome	chr1D_493605325	1D.2	7.99679
chr1D_488573902	chr1D	488573902	TraesCS1D01G445700	NA	correctChromosome	chr1D_493605325	1D.2	7.99679
chr1D_480888319	chr1D	480888319	TraesCS1D01G428900	NA	correctChromosome	chr1D_493605325	1D.2	7.99679
chr1D_487177126	chr1D	487177126	TraesCS1D01G443100	NA	correctChromosome	chr1D_493605325	1D.2	7.99679
chr1D_491039581	chr1D	491039581	TraesCS1D01G448700	NA	correctChromosome	chr1D_493605325	1D.2	7.99679
chr1D_494473300	chr1D	494473300	TraesCS1D01G453600	NA	correctChromosome	chr1D_493605325	1D.2	7.99679
chr1D_488573916	chr1D	488573916	TraesCS1D01G445700	NA	correctChromosome	chr1D_493605325	1D.2	7.99679
chr1D_488573709	chr1D	488573709	TraesCS1D01G445700	NA	correctChromosome	chr1D_493605325	1D.2	7.99679
chr1D_492611706	chr1D	492611706	TraesCS1D01G450200	NA	correctChromosome	chr1D_493605325	1D.2	7.99679
chr1D_488576481	chr1D	488576481	TraesCS1D01G445700	NA	correctChromosome	chr1D_493605325	1D.2	7.99679
chr1D_481415508	chr1D	481415508	TraesCS1D01G430600	NA	correctChromosome	chr1D_493605325	1D.2	7.99679
chr1D_487894996	chr1D	487894996	TraesCS1D01G444900	NA	correctChromosome	chr1D_493605325	1D.2	7.99679
chr1D_487957511	chr1D	487957511	TraesCS1D01G445300	NA	correctChromosome	chr1D_493605325	1D.2	7.99679
chr1D_487177224	chr1D	487177224	TraesCS1D01G443100	NA	correctChromosome	chr1D_493605325	1D.2	7.99679
chr1D_487956685	chr1D	487956685	TraesCS1D01G445300	NA	correctChromosome	chr1D_493605325	1D.2	7.99679
chr1D_50206767	chr1D	50206767	TraesCS1D01G069500	NA	correctChromosome	chr1D_50206767	1D.1	29.352
chr1D_613608	chr1D	613608	TraesCS1D01G002600	NA	correctChromosome	chr1D_577596	1D.1	0
chr1D_577596	chr1D	577596	TraesCS1D01G002500	NA	correctChromosome	chr1D_577596	1D.1	0
chr1D_613624	chr1D	613624	TraesCS1D01G002600	NA	correctChromosome	chr1D_577596	1D.1	0
chr1D_2496006	chr1D	2496006	TraesCS1D01G005400	NA	correctChromosome	chr1D_577596	1D.1	0
chr1D_613627	chr1D	613627	TraesCS1D01G002600	NA	correctChromosome	chr1D_613627	1D.1	0.64524
chr1D_69687842	chr1D	69687842	TraesCS1D01G085300-TraesCS1D01G085400	NA	correctChromosome	chr1D_69687842	1D.1	30.8286
chr1D_7899740	chr1D	7899740	TraesCS1D01G018000	NA	correctChromosome	chr1D_7876298	1D.1	1.28729
chr1D_7897509	chr1D	7897509	TraesCS1D01G017900	NA	correctChromosome	chr1D_7876298	1D.1	1.28729
chr1D_7876703	chr1D	7876703	TraesCS1D01G017700	NA	correctChromosome	chr1D_7876298	1D.1	1.28729
chr1D_7913291	chr1D	7913291	TraesCS1D01G018200	NA	correctChromosome	chr1D_7876298	1D.1	1.28729
chr1D_7913252	chr1D	7913252	TraesCS1D01G018200	NA	correctChromosome	chr1D_7876298	1D.1	1.28729
[truncated: 20,380 more rows]
